# Supplementary material for: Patient-Derived Tumor Organoids for Guidance of Personalized Drug Therapies in Recurrent Glioblastoma
Source: MDPI journal article supplement (doi:10.3390/ijms23126572), 2022-06-12
Supplement: s1 [file s1]

Table S2. Raw values of inter-individual enrichment of KEGG pathways from RNA-seq of glioblastoma tumor tissue.

| Pathways                                                      | cluster | Afatinib     | Erlotinib HCl | Dacomitinib  | Gefitinib    | Lapatinib    | Neratinib    | CO-1686       | Everolimus    | BYL719       | Pilralisib   | XL765        | Pazopanib HCl | Sunitinib Malate |
|---------------------------------------------------------------|---------|--------------|---------------|--------------|--------------|--------------|--------------|---------------|---------------|--------------|--------------|--------------|---------------|------------------|
| 1 ABC_TRANSPORTERS                                            | C3      | 0.042868983  | 0.344133884   | -0.603075154 | 0.236562809  | -0.285508155 | -0.228591303 | -0.224758684  | -0.224758684  | -0.098339820 | -0.091118024 | -0.169234872 | 0.172645329   | 0.346217840      |
| 2 ACUTE_MYELOID_LEUKEMIA                                      | C3      | 0.419581299  | 0.047191204   | 0.390363130  | -0.322163112 | -0.091031985 | 0.508968875  | 0.666596482   | -0.072568705  | -0.165894137 | 0.060900321  | -0.196497087 | 0.071498883   | 0.341592876      |
| 3 ADHERENS_JUNCTION                                           | C3      | 0.474243727  | 0.158037622   | 0.317387501  | -0.232366659 | -0.095363754 | 0.510886322  | 0.624126508   | -0.064732780  | -0.134536716 | 0.094838362  | -0.179123535 | 0.153216675   | 0.449462540      |
| 4 ADIPOCYTOKINE_SIGNALING_PATHWAY                             | C2      | 0.772671654  | 0.557024690   | 0.462027394  | 0.193483353  | 0.238367688  | 0.737196876  | 0.733448072   | 0.282494063   | 0.245681926  | 0.453788667  | 0.188231264  | 0.542590216   | 0.782399346      |
| 5 ALANINE_ASPARTATE_AND_GLUTAMATE_METABOLISM                  | C3      | -0.058882281 | 0.130742145   | 0.208176869  | 0.495489232  | 0.551890470  | -0.029296570 | -0.140159183  | 0.514176007   | 0.538308072  | 0.345230966  | 0.591758018  | 0.206981387   | -0.151373659     |
| 6 ALDOSTERONE_REGULATED_SODIUM_REABSORPTION                   | C3      | 0.285791785  | -0.159158858  | 0.518525987  | -0.443002115 | -0.042950288 | 0.472178206  | 0.697948747   | -0.051183227  | -0.182161715 | 0.013789831  | -0.180879849 | -0.076028218  | 0.105323423      |
| 7 ALLOGRAFT_REJECTION                                         | C2      | 0.926230274  | 0.667691268   | 0.824789810  | 0.408531164  | 0.622741605  | 0.964348854  | 0.957607794   | 0.645112824   | 0.578191163  | 0.747572158  | 0.548978803  | 0.728099006   | 0.819087925      |
| 8 ALPHA_LINOLENIC_ACID_METABOLISM                             | C2      | 0.564065383  | 0.535132780   | 0.795416256  | 0.700778594  | 0.942231961  | 0.640714931  | 0.553190646   | 0.917687540   | 0.883295405  | 0.821741451  | 0.918389394  | 0.659951594   | 0.381422052      |
| 9 ALZHEIMERS_DISEASE                                          | C2      | 0.906597637  | 0.760379198   | 0.556891748  | 0.453448099  | 0.462902223  | 0.841281883  | 0.769471635   | 0.508737741   | 0.490076574  | 0.665026235  | 0.433124156  | 0.750969886   | 0.920783125      |
| 10 AMINO_SUGAR_AND_NUCLEOTIDE_SUGAR_METABOLISM                | C2      | 0.774776848  | 0.641230742   | 0.354433970  | 0.290870306  | 0.231212303  | 0.685062033  | 0.630120950   | 0.284414266   | 0.276610426  | 0.467255060  | 0.209490004  | 0.598080590   | 0.839423622      |
| 11 AMINOACYL_TRNA_BIOSYNTHESIS                                | C3      | 0.185894403  | 0.574063552   | -0.081360089 | 0.814211967  | 0.496964455  | 0.004325959  | -0.272195494  | 0.511662766   | 0.625190122  | 0.464958562  | 0.617354093  | 0.528916207   | 0.310772556      |
| 12 AMYOTROPHIC_LATERAL_SCLEROSIS_ALS                          | C3      | 0.121246345  | -0.117696777  | -0.092085133 | -0.493267102 | -0.483872433 | 0.120642643  | 0.250648163   | -0.450197673  | -0.491629154 | -0.285764023 | -0.540659479 | -0.173481494  | 0.177170109      |
| 13 ANTIGEN_PROCESSING_AND_PRESENTATION                        | C2      | 0.659570418  | 0.328646760   | 0.540207967  | -0.037815833 | 0.158251837  | 0.711304144  | 0.799393621   | 0.185366843   | 0.106244730  | 0.329948709  | 0.067145603  | 0.353627508   | 0.591218328      |
| 14 APOPTOSIS                                                  | C3      | 0.556390051  | 0.171606633   | 0.560063721  | -0.178248450 | 0.100314642  | 0.658871703  | 0.798852448   | 0.115656169   | 0.014644638  | 0.236639513  | -0.011262807 | 0.219362357   | 0.443818879      |
| 15 ARACHIDONIC_ACID_METABOLISM                                | C2      | 0.490059609  | 0.081789601   | 0.561590783  | -0.253247525 | 0.066277915  | 0.618891351  | 0.785308268   | 0.074871175   | -0.036579388 | 0.180875915  | -0.054786578 | 0.141306079   | 0.354954011      |
| 16 ARGININE_AND_PROLINE_METABOLISM                            | C2      | 0.865614577  | 0.557683965   | 0.828120721  | 0.284567751  | 0.550944106  | 0.935734281  | 0.970730805   | 0.568407942   | 0.484684115  | 0.666303869  | 0.662632523  | 0.628534737   | 0.734611052      |
| 17 ARYTHMOGENIC_RIGHT_VENTRICULAR_CARDIOMYOPATHY_ARVC         | C2      | 0.760293244  | 0.473219090   | 0.572706428  | 0.115386623  | 0.265881795  | 0.780223463  | 0.822721413   | 0.298939758   | 0.234770550  | 0.450103521  | 0.189710412  | 0.490579453   | 0.711602336      |
| 18 ASCORBATE_AND_ALDARATE_METABOLISM                          | C3      | 0.485700081  | 0.662594884   | 0.617523406  | -0.249764894 | 0.112213352  | 0.636507152  | 0.11462882701 | 0.11462882701 | -0.005535688 | 0.203488898  | -0.016135172 | 0.137973792   | 0.323437601      |
| 19 ASTHMA                                                     | C2      | 0.879565680  | 0.62326058    | 0.694618275  | 0.308800426  | 0.464880469  | 0.892158700  | 0.893131113   | 0.496530100   | 0.437892288  | 0.631332055  | 0.396363128  | 0.655148825   | 0.815765873      |
| 20 AUTOIMMUNE_THYROID_DISEASE                                 | C2      | 0.671516657  | 0.338287854   | 0.560164546  | -0.024381027 | 0.179465060  | 0.726244588  | 0.813520557   | 0.205777500   | 0.125257002  | 0.347765361  | 0.087225039  | 0.366752220   | 0.597785858      |
| 21 AXON_GUIDANCE                                              | C3      | 0.119486092  | -0.077171690  | -0.157587743 | -0.450900962 | -0.500093591 | 0.088789994  | 0.190313551   | -0.460930309  | -0.486772090 | -0.287705139 | -0.541860464 | -0.150122945  | 0.207168186      |
| 22 B_CELL_RECEPTOR_SIGNALING_PATHWAY                          | C3      | 0.571795896  | 0.261150853   | 0.400714687  | -0.125091214 | 0.016424002  | 0.602779151  | 0.694676604   | 0.48498014    | -0.020143295 | 0.208206177  | -0.065779267 | 0.26265723    | 0.540123809      |
| 23 BASAL_CELL_CARCINOMA                                       | C2      | 0.279554850  | 0.538762670   | 0.723294491  | 0.823691588  | 0.738704350  | 0.209610012  | -0.00589457   | 0.729217830   | 0.788354561  | 0.627488789  | 0.809286023  | 0.574365005   | 0.265754314      |
| 24 BASAL_TRANSCRIPTION_FACTORS                                | C3      | -0.015844945 | 0.219137746   | 0.166082450  | 0.578484355  | 0.569322897  | -0.023510568 | -0.170156811  | 0.539412752   | 0.581043133  | 0.384864191  | 0.625818867  | 0.276883781   | -0.073047003     |
| 25 BASE_EXCISION_REPAIR                                       | C3      | -0.089949692 | 0.150817965   | 0.109891979  | 0.521944960  | 0.508694232  | -0.093830106 | -0.230632160  | 0.476486494   | 0.519051385  | 0.315471747  | 0.566441705  | 0.206082771   | -0.144166804     |
| 26 BETA_ALANINE_METABOLISM                                    | C1      | -0.982523203 | -0.873055990  | -0.67162120  | -0.639146597 | -0.668333264 | -0.920348238 | -0.810764659  | -0.707845609  | -0.831547132 | -0.646194331 | -0.885662638 | -0.970332826  | -0.970332826     |
| 27 BIOSYNTHESIS_OF_UNSATURATED_FATTY_ACIDS                    | C3      | 0.205030796  | 0.582257886   | -0.039602573 | 0.827437781  | 0.531963576  | 0.033074149  | -0.240276519  | 0.544562682   | 0.653281590  | 0.492631793  | 0.648026501  | 0.545294062   | 0.316373954      |
| 28 BLADDER_CANCER                                             | C3      | 0.365276644  | -0.084471816  | 0.719212365  | -0.287943332 | 0.198932555  | 0.589021989  | 0.802171237   | 0.177287382   | 0.033837580  | 0.195357489  | 0.052977585  | 0.041638169   | 0.120159615      |
| 29 BUTANOATE_METABOLISM                                       | C1      | -0.443787620 | -0.001407984  | -0.680065283 | 0.264988348  | -0.161232587 | -0.630605066 | -0.825647585  | -0.152605284  | -0.019721237 | -0.210060503 | -0.022695181 | -0.102258863  | -0.239945531     |
| 30 CALCIUM_SIGNALING_PATHWAY                                  | C3      | -0.234053635 | -0.304455044  | -0.537976297 | -0.539624390 | -0.776809809 | -0.216090221 | -0.739900735  | -0.779425587  | -0.728030729 | -0.590973658 | -0.779425587 | -0.418421674  | -0.074236793     |
| 31 CARDIAC_MUSCLE_CONTRACTION                                 | C1      | -0.402876531 | 0.015562857   | -0.508489523 | 0.345740348  | 0.015068376  | -0.544496904 | -0.733080870  | 0.009964288   | 0.125505676  | -0.089705678 | 0.140051071  | -0.044242433  | -0.264109248     |
| 32 CELL_ADHESION_MOLECULES_CAMS                               | C3      | 0.399944680  | 0.072533791   | 0.273945709  | -0.315161207 | -0.166351476 | 0.448692870  | 0.582408149   | -0.138796636  | -0.212851776 | 0.015616548  | -0.254249770 | 0.068406063   | 0.371028482      |
| 33 CELL_CYCLE                                                 | C1      | -0.407985288 | -0.156822021  | -0.144683902 | 0.241249307  | 0.209523515  | -0.395819783 | -0.481169088  | 0.169545005   | 0.213766675  | -0.008842325 | 0.269292765  | -0.116500139  | -0.444756540     |
| 34 CHEMOKINE_SIGNALING_PATHWAY                                | C3      | 0.442831529  | 0.025575670   | 0.543698524  | -0.303319428 | 0.030372425  | 0.582741492  | 0.763265994   | 0.035989624   | -0.079430465 | 0.135705869  | -0.094332401 | 0.088260301   | 0.300673464      |
| 35 CHRONIC_MYELOID_LEUKEMIA                                   | C3      | 0.360103584  | -0.091521384  | 0.656170140  | -0.335067682 | 0.117634940  | 0.567118423  | 0.782886572   | 0.102581480   | -0.036381618 | 0.143485575  | -0.025889725 | 0.017388309   | 0.140919818      |
| 36 CIRCADIAN_RHYTHM_MAMMAL                                    | C2      | 0.895154216  | 0.634962580   | 0.737075017  | 0.334713010  | 0.511217164  | 0.916840657  | 0.917334813   | 0.540015814   | 0.477896685  | 0.665617627  | 0.440074046  | 0.675804247   | 0.817038863      |
| 37 CITRATE_CYCLE_TCA_CYCLE                                    | C2      | 0.512404068  | 0.728208996   | 0.424384153  | 0.933544295  | 0.858594758  | 0.429620062  | 0.200093933   | 0.860206667   | 0.912461473  | 0.797698378  | 0.919490832  | 0.763521489   | 0.499206843      |
| 38 COLORECTAL_CANCER                                          | C3      | 0.306254522  | 0.040986490   | 0.835642793  | 0.137221970  | 0.628750717  | 0.533675611  | 0.639995846   | 0.579917889   | 0.467064564  | 0.465807861  | 0.525845457  | 0.216887792   | 0.008423073      |
| 39 COMPLEMENT_AND_COAGULATION_CASCADES                        | C3      | 0.500380862  | 0.153367605   | 0.406043437  | -0.225928700 | -0.032739025 | 0.563740758  | 0.691055337   | -0.007902328  | -0.090766856 | 0.138334541  | -0.128433277 | 0.168280570   | 0.441871103      |
| 40 CYSTEINE_AND_METHIONINE_METABOLISM                         | C3      | -0.012082659 | 0.383691353   | -0.170689480 | 0.686865228  | 0.398496778  | -0.163382862 | -0.409168199  | 0.400522158   | 0.509539649  | 0.316331002  | 0.516977026  | 0.349109033   | 0.093435902      |
| 41 CYTOKINE_CYTOKINE_RECEPTOR_INTERACTION                     | C3      | 0.543161950  | 0.133824003   | 0.628342984  | -0.189214936 | 0.147423163  | 0.676354584  | 0.833556681   | 0.154555487   | 0.040950469  | 0.254009149  | 0.024985640  | 0.202810282   | 0.394570164      |
| 42 CYTOSOLIC_DNA_SENSING_PATHWAY                              | C2      | 0.549277286  | 0.278432062   | 0.305426492  | -0.116055479 | -0.040589989 | 0.548122137  | 0.619705845   | -0.001924302  | -0.054523836 | 0.171600345  | -0.107860124 | 0.257950424   | 0.556102497      |
| 43 DILATED_CARDIOMYOPATHY                                     | C2      | 0.671583858  | 0.289547706   | 0.705959443  | -0.028353629 | 0.285514210  | 0.782518482  | 0.899310300   | 0.297360947   | 0.192806040  | 0.401865644  | 0.172315839  | 0.358315017   | 0.529714773      |
| 44 DNA_REPLICATION                                            | C1      | -0.244629266 | 0.004554813   | -0.010714628 | 0.393762096  | 0.371810255  | -0.240286817 | -0.350444723  | 0.335382341   | 0.379232442  | 0.163726613  | 0.431231822  | 0.053499302   | -0.291040805     |
| 45 DORSO_VENTRAL_AXIS_FORMATION                               | C3      | -0.060558919 | -0.258899083  | -0.268931884 | -0.603796261 | -0.640364346 | -0.070426622 | 0.067418202   | -0.608990117  | -0.638476461 | -0.455277277 | -0.684749134 | -0.331141961  | 0.022072825      |
| 46 DRUG_METABOLISM_CYTOCHROME_P450                            | C3      | 0.478976598  | 0.095103358   | 0.475596404  | -0.264533148 | -0.002998816 | 0.579093769  | 0.732807867   | 0.013051338   | -0.086055683 | 0.138943598  | -0.113402096 | 0.132718225   | 0.380377534      |
| 47 DRUG_METABOLISM_OTHER_ENZYMES                              | C3      | 0.442562885  | 0.056888420   | 0.445474855  | -0.303378452 | -0.043080311 | 0.545014259  | 0.705612259   | -0.027690670  | -0.127248020 | 0.097676921  | -0.154037704 | 0.094212034   | 0.346129073      |
| 48 ECM_RECEPTOR_INTERACTION                                   | C2      | 0.843566495  | 0.519682756   | 0.839799710  | 0.250387703  | 0.540956070  | 0.927912167  | 0.976734583   | 0.554884114   | 0.465145039  | 0.646899703  | 0.444646723  | 0.597396265   | 0.699468464      |
| 49 ENDOCYTOSIS                                                | C3      | 0.178578537  | -0.087501004  | -0.008229159 | -0.469188381 | -0.421699877 | 0.193024855  | 0.329352376   | -0.389890684  | -0.227498035 | -0.440998007 | -0.447811242 | 0.130480641   | 0.212522663      |
| 50 ENDOMETRIAL_CANCER                                         | C1      | -0.429326672 | -0.321450729  | -0.813398569 | -0.494735688 | -0.843400950 | -0.572145386 | -0.557874624  | -0.804721898  | -0.740335764 | -0.684127915 | -0.790824542 | -0.473466155  | -0.191677945     |
| 51 EPITHELIAL_CELL_SIGNALING_IN_Helicobacter_Pylori_INFECTION | C3      | 0.606237023  | 0.314948647   | 0.399285058  | -0.072027955 | 0.044357173  | 0.621461054  | 0.695129676   | 0.079720297   | 0.018281098  | 0.244827092  | -0.030809026 | 0.310414707   | 0.587165245      |
| 52 ERBB_SIGNALING_PATHWAY                                     | C1      | -0.557860851 | -0.548823463  | -0.771939449 | -0.723203565 | -0.943758740 | -0.624135274 | -0.525363586  | -0.920360247  | -0.823898696 |              |              |               |                  |

|    | Pathways                                             | Axitinib     | Tivozanib     | Vandetanib   | Regorafenib  | Selumetinib  | Trametinib   | Crizotinib   | Cabozantinib | Foretinib    | Palbociclib HCl | Ribociclib   | Abemaciclib  | Velliparib   | Olaparib     |
|----|------------------------------------------------------|--------------|---------------|--------------|--------------|--------------|--------------|--------------|--------------|--------------|-----------------|--------------|--------------|--------------|--------------|
| 1  | ABC_METEOR                                           | -0.010346404 | 0.034854692   | 0.505100234  | 0.585858472  | 0.403344917  | 0.654047231  | -0.520023335 | -0.107184028 | -0.071548389 | 0.323485205     | -0.896810476 | -0.077810526 | -0.189534280 | 0.410893986  |
| 2  | ACUTE_TMYELOID_LEUKEMIA                              | 0.426635480  | 0.106477962   | 0.087362677  | 0.245993823  | 0.439336854  | 0.620158360  | 0.335864328  | 0.407353109  | 0.304776259  | 0.372971379     | 0.074140309  | -0.248707425 | -0.199169175 | 0.278773462  |
| 3  | ADHERENS_JUNCTION                                    | 0.471555828  | 0.163587051   | 0.223593950  | 0.392146655  | 0.553739127  | 0.756628986  | 0.282038481  | 0.434820970  | 0.340638159  | 0.476497579     | -0.112914470 | -0.214582459 | 0.213831415  | 0.398117844  |
| 4  | ADIPOCYTOKINE_SIGNALING_PATHWAY                      | 0.761793764  | 0.534043922   | 0.608124448  | 0.728960125  | 0.851298835  | 0.884085798  | 0.475140666  | 0.716709985  | 0.655716755  | 0.800608203     | -0.416329507 | 0.172553071  | 0.530693232  | 0.745845881  |
| 5  | ALANINE_ASPARTATE_AND_GLUTAMATE_METABOLISM           | -0.039730486 | 0.246271132   | -0.009646047 | -0.220958994 | -0.291569365 | -0.736250258 | 0.244017911  | 0.025149121  | 0.111043795  | -0.169244048    | 0.201345655  | 0.594025427  | 0.262370215  | -0.129728541 |
| 6  | ALDOSTERONE_REGULATED_SODIUM_REABSORPTION            | 0.312192110  | 0.006200953   | -0.178609439 | -0.061773721 | 0.175892562  | 0.275903760  | 0.433054618  | 0.331426505  | 0.224465615  | 0.141950797     | 0.439057132  | -0.261707586 | 0.175197201  | 0.025809045  |
| 7  | ALLOGRAFT_REJECTION                                  | 0.934926540  | 0.770378591   | 0.626299039  | 0.659747098  | 0.826302380  | 0.599848395  | 0.836522540  | 0.932960155  | 0.887189508  | 0.839364134     | -0.199824044 | 0.507277611  | 0.830461468  | 0.766985951  |
| 8  | ALPHA_LINOLENIC_ACID_METABOLISM                      | 0.591984723  | 0.736188456   | 0.366006624  | 0.190130886  | 0.254342898  | -0.322072357 | 0.828426237  | 0.658010677  | 0.701786388  | 0.380866834     | 0.128444711  | 0.884277979  | 0.811148231  | 0.360222121  |
| 9  | ALZHEIMERS_DISEASE                                   | 0.894278615  | 0.738543232   | 0.787429370  | 0.860219043  | 0.956034575  | 0.854557354  | 0.596984206  | 0.853262833  | 0.818140275  | 0.932737362     | -0.533277792 | 0.426828143  | 0.712370357  | 0.893636870  |
| 10 | AMINO_SUGAR_AND_NUCLEOTIDE_SUGAR_METABOLISM          | 0.754562735  | 0.564333902   | 0.712572652  | 0.829797119  | 0.906688737  | 0.949232358  | 0.388476763  | 0.695431935  | 0.650340211  | 0.851086571     | -0.585030574 | 0.213052622  | 0.515298874  | 0.818664309  |
| 11 | AMINOACYL_TRNA_BIOSYNTHESIS                          | 0.164777724  | 0.467849542   | 0.546797514  | 0.395840899  | 0.210029392  | -0.110066049 | 0.027307971  | 0.154174804  | 0.264060264  | 0.277834306     | -0.564769968 | 0.684855533  | 0.315460257  | 0.374583974  |
| 12 | AMYOTROPHIC_LATERAL_SCLEROSIS_ALS                    | 0.107759779  | -0.196618287  | 0.005118076  | 0.212575356  | 0.313429148  | 0.720934260  | -0.135471883 | 0.051686994  | -0.041617408 | 0.198880624     | -0.129646716 | -0.554842060 | -0.186651085 | 0.145364005  |
| 13 | ANTIGEN_PROCESSING_AND_PRESENTATION                  | 0.663001724  | 0.381836002   | 0.354562146  | 0.484239916  | 0.666484156  | 0.723897543  | 0.514994877  | 0.640115003  | 0.554720582  | 0.618746993     | -0.110267821 | 0.023083758  | 0.448853287  | 0.533294991  |
| 14 | APOPTOSIS                                            | 0.568390331  | 0.268595710   | 0.180930423  | 0.309620300  | 0.519289919  | 0.589400949  | 0.512613993  | 0.560203491  | 0.464140415  | 0.475665353     | 0.082727634  | -0.070455651 | 0.375270480  | 0.375751979  |
| 15 | ARACHIDONIC_ACID_METABOLISM                          | 0.506589705  | 0.201328070   | 0.081857623  | 0.207973414  | 0.429358684  | 0.505575260  | 0.502610016  | 0.506635545  | 0.406223993  | 0.388686202     | 0.188008124  | -0.121364579 | 0.328154868  | 0.282398350  |
| 16 | ARGININE_AND_PROLINE_METABOLISM                      | 0.878799557  | 0.682425259   | 0.514240263  | 0.560990606  | 0.751582818  | 0.561187591  | 0.822770316  | 0.882364494  | 0.823676416  | 0.759021574     | -0.085483610 | 0.408519201  | 0.768111962  | 0.674113218  |
| 17 | ARRHYTHMOGENIC_RIGHT_VENTRICULAR_CARDIOMYOPATHY_ARVC | 0.759582255  | 0.508751385   | 0.497904680  | 0.612351765  | 0.775620627  | 0.779992716  | 0.566401968  | 0.731579741  | 0.658982231  | 0.735380420     | -0.236371330 | 0.154542817  | 0.551431010  | 0.660672408  |
| 18 | ASCORBATE_AND_ALDARATE_METABOLISM                    | 0.507102701  | 0.210207911   | 0.043992640  | 0.155035693  | 0.387592198  | 0.425635933  | 0.517254281  | 0.517254281  | 0.417681061  | 0.358158447     | 0.264486191  | -0.089641840 | 0.354889813  | 0.246789780  |
| 19 | ASTHMA                                               | 0.880787691  | 0.678638353   | 0.620486566  | 0.694893115  | 0.851363188  | 0.735617031  | 0.704604875  | 0.860995273  | 0.805138828  | 0.836448074     | -0.281597996 | 0.362938199  | 0.717268222  | 0.767400565  |
| 20 | AUTOIMMUNE_THYROID_DISEASE                           | 0.675800554  | 0.397276140   | 0.359875446  | 0.485546012  | 0.670151968  | 0.714293734  | 0.535206160  | 0.654766847  | 0.570059811  | 0.625432690     | -0.103143046 | 0.041966290  | 0.467010228  | 0.539691676  |
| 21 | AXON_GUIDANCE                                        | 0.100563738  | -0.187794166  | 0.059261158  | 0.268330244  | 0.345073758  | 0.766643139  | -0.190305303 | 0.037426847  | -0.050253623 | -0.223809632    | -0.545335688 | -0.203136506 | 0.183851874  | 0.183851874  |
| 22 | B_CELL_RECEPTOR_SIGNALING_PATHWAY                    | 0.569511265  | 0.275206322   | 0.313306105  | 0.469523334  | 0.633411598  | 0.777411428  | 0.374305146  | 0.534665209  | 0.446034326  | 0.566451516     | -0.156648411 | -0.101232539 | 0.323039167  | 0.488371793  |
| 23 | BASAL_CELL_CARCINOMA                                 | 0.281792120  | 0.575220107   | 0.430822971  | 0.130190752  | -0.358145926 | 0.355173278  | 0.314427083  | 0.413426357  | 0.242287799  | -0.226528999    | 0.836790838  | 0.517848064  | 0.300491199  | 0.300491199  |
| 24 | BASAL_TRANSCRIPTION_FACTORS                          | -0.003138824 | 0.299726842   | 0.092628420  | -0.117851747 | -0.212845935 | -0.656540581 | 0.217037154  | 0.051047759  | 0.145469747  | -0.094559315    | 0.070393998  | 0.640116995  | 0.285763419  | -0.042702606 |
| 25 | BASE_EXCISION_REPAIR                                 | -0.077049828 | 0.228177043   | 0.027717107  | -0.180692262 | -0.281483190 | -0.699172138 | 0.156287197  | -0.022083729 | 0.072113838  | -0.166056563    | 0.105734839  | 0.581385687  | 0.215314949  | -0.112212503 |
| 26 | BETA_ALANINE_METABOLISM                              | -0.974655972 | -0.883837957  | -0.862660346 | -0.882551532 | -0.969124558 | -0.729819945 | -0.729819945 | -0.948352045 | -0.933801618 | -0.978554484    | 0.526093339  | -0.639411456 | -0.860738746 | -0.946191655 |
| 27 | BIOSYNTHESIS_OF_UNSATURATED_FATTY_ACIDS              | 0.186115422  | 0.490167539   | 0.546216829  | 0.389074846  | 0.211070092  | -0.131394949 | 0.067642241  | 0.179750410  | 0.289358994  | 0.284200264     | -0.538404310 | 0.711879290  | 0.346211689  | 0.377507214  |
| 28 | BLADDER_CANCER                                       | 0.402724068  | 0.151821303   | -0.161140313 | -0.105100060 | 0.148447442  | 0.081160837  | 0.686979977  | 0.448232317  | 0.356149821  | 0.156263355     | 0.555420091  | -0.040236524 | 0.352512703  | 0.034841343  |
| 29 | BUTANOATE_METABOLISM                                 | -0.473013977 | -0.1934400824 | 0.044934217  | -0.041542666 | -0.287819661 | -0.273933440 | -0.607182014 | -0.499876667 | -0.402485649 | -0.275836739    | -0.401268227 | 0.061174791  | -0.366370290 | -0.157983402 |
| 30 | CALCIUM_SIGNALING_PATHWAY                            | -0.261746881 | -0.486300625  | -0.134428937 | 0.072596818  | 0.068352446  | 0.608298057  | -0.567775294 | -0.336086795 | -0.402210304 | -0.065618022    | -0.235740046 | -0.567310105 | -0.071581858 | 0.071581858  |
| 31 | CARDIAC_MUSCLE_CONTRACTION                           | -0.420795801 | -0.106741453  | 0.012072758  | -0.121129503 | -0.344407763 | -0.458398316 | -0.439992414 | -0.422821810 | -0.317904579 | -0.298786980    | -0.253670541 | 0.209090296  | -0.242031202 | -0.190476312 |
| 32 | CELL_ADHESION_MOLECULES_CAMS                         | 0.398603656  | 0.081358940   | 0.140968820  | 0.316310620  | 0.480809382  | 0.717094446  | 0.229867770  | 0.363689799  | 0.265019535  | 0.399095901     | -0.053500960 | -0.292276615 | 0.139855306  | 0.318325478  |
| 33 | CELL_CYCLE                                           | -0.395230582 | -0.099510196  | -0.256519304 | -0.442020639 | -0.562079071 | -0.838040660 | -0.121027205 | -0.340720828 | -0.253564155 | -0.466929049    | 0.250847083  | 0.286339464  | -0.107343187 | -0.407671096 |
| 34 | CHEMOKINE_SIGNALING_PATHWAY                          | 0.461010590  | 0.151903334   | 0.024266612  | 0.151797658  | 0.376595557  | 0.466691570  | 0.478591627  | 0.463924859  | 0.361032590  | 0.335150829     | 0.237577716  | -0.163597374 | 0.286724574  | 0.226674792  |
| 35 | CHRONIC_MYELOID_LEUKEMIA                             | 0.392837582  | 0.116171014   | -0.144996141 | -0.063128496 | 0.186717064  | 0.181921789  | 0.573873478  | 0.426843224  | 0.328029813  | 0.177535510     | 0.493901350  | -0.114346324 | 0.303504038  | 0.057174591  |
| 36 | CIRCADIAN_RHYTHM_MAMMAL                              | 0.898813622  | 0.705339665   | 0.620338592  | 0.683449228  | 0.844728864  | 0.696904375  | 0.746885967  | 0.884497750  | 0.830821309  | 0.837880971     | -0.253516497 | 0.043556679  | 0.751885762  | 0.766953748  |
| 37 | CITRATE_CYCLE_TCA_CYCLE                              | 0.512164414  | 0.763039462   | 0.625658769  | 0.445921663  | 0.371726044  | -0.143710345 | 0.515077179  | 0.535318878  | 0.624197194  | 0.478275061     | -0.351259463 | 0.943966449  | 0.782816165  | 0.524766442  |
| 38 | COLORECTAL_CANCER                                    | 0.355538194  | 0.348854553   | -0.140024320 | -0.254570125 | -0.076014528 | -0.491977318 | 0.789303603  | 0.447876041  | 0.430748434  | 0.027595592     | 0.658577000  | 0.442002120  | 0.545205788  | -0.053264561 |
| 39 | COMPLEMENT_AND_COAGULATION_CASCADES                  | 0.503346540  | 0.193677311   | 0.198994447  | 0.355451944  | 0.537288694  | 0.697262246  | 0.364579044  | 0.477133642  | 0.380566936  | 0.471156116     | -0.032882591 | -0.173534262 | 0.266748891  | 0.383493470  |
| 40 | CYSTEINE_AND_METHIONINE_METABOLISM                   | -0.027750601 | 0.298212829   | 0.344506305  | 0.178707117  | -0.014541236 | -0.315574556 | -0.076926924 | -0.025250771 | 0.087603845  | 0.059825955     | -0.398724369 | 0.580084295  | 0.165037029  | 0.158500620  |
| 41 | CYTOKINE_CYTOKINE_RECEPTOR_INTERACTION               | 0.561656720  | 0.268351732   | 0.120627164  | 0.232553729  | 0.458630549  | 0.486613038  | 0.572958678  | 0.566495798  | 0.469926373  | 0.428134148     | 0.190173230  | -0.043909492 | 0.399913225  | 0.320518179  |
| 42 | CYTOSOLIC_DNA_SENSING_PATHWAY                        | 0.540513775  | 0.253206486   | 0.353531485  | 0.518135230  | 0.657135020  | 0.841085299  | 0.287657028  | 0.494089599  | 0.409942174  | 0.579442567     | -0.254072017 | -0.131751044 | 0.250731033  | 0.512997674  |
| 43 | DILATED_CARDIOMYOPATHY                               | 0.687898475  | 0.419483613   | 0.268388097  | 0.362865917  | 0.580478605  | 0.538937926  | 0.667477079  | 0.690747977  | 0.604786818  | 0.560789682     | 0.085730056  | 0.108637134  | 0.535467169  | 0.459139100  |
| 44 | DNA_REPLICATION                                      | -0.231226451 | 0.073534503   | -0.109066656 | -0.309335738 | -0.420638053 | -0.775960018 | 0.025307248  | -0.175665414 | -0.083603730 | -0.313347531    | 0.177647846  | 0.447325699  | 0.063077658  | -0.256229246 |
| 45 | DORSO_VENTRAL_AXIS_FORMATION                         | -0.076881562 | -0.364976220  | -0.119700610 | 0.093315836  | 0.165015981  | 0.643554385  | -0.316769237 | -0.136301296 | -0.225450854 | 0.040774982     | -0.101128881 | -0.690750321 | -0.367894883 | -0.000587708 |
| 46 | DRUG_METABOLISM_CYTOCHROME_P450                      | 0.489147714  | 0.176427165   | 0.119063328  | 0.263536912  | 0.467605510  | 0.596191185  | 0.422564182  | 0.476387565  | 0.375808675  | 0.412425750     | 0.094127735  | -0.170383621 | 0.279393974  | 0.314001455  |
| 47 | DRUG_METABOLISM_OTHER_ENZYMES                        | 0.452660037  | 0.135504247   | 0.084661722  | 0.233920654  | 0.437078910  | 0.586360523  | 0.389155402  | 0.439407250  | 0.336945001  | 0.378411706     | 0.111380153  | -0.211070058 | 0.239537420  | 0.279916656  |
| 48 | ECM_RECEPTOR_INTERACTION                             | 0.859209940  | 0.657440048   | 0.470112394  | 0.517111259  | 0.715716141  | 0.526383513  | 0.828551433  | 0.866969205  | 0.805297948  | 0.725147015     | -0.033486107 | 0.388125109  | 0.754430908  | 0.635902407  |
| 49 | ENDOCYTOSIS                                          | 0.168339103  | -0.144092077  | 0.023169432  | 0.225764868  | 0.344424092  | 0.718808066  | -0.053963903 | 0.117507548  | 0.021038845  | 0.236272157     | -0.099412870 | -0.508739394 | -0.          |              |

|    | Pathways                                             | Erismedegib  | Vismodegib   | Temozolomide | Ibrutinib    | RXDX-101     | Ruxolitinib  | Alectinib    | Vemurafenib  | Dabrafenib   | Nilotinib    | Dasatinib    | Bosutinib    | ABT-199      | Dovitinib    |
|----|------------------------------------------------------|--------------|--------------|--------------|--------------|--------------|--------------|--------------|--------------|--------------|--------------|--------------|--------------|--------------|--------------|
| 1  | ABC_TRANSPORTERS                                     | 0.069545636  | 0.043377927  | 0.530033049  | 0.078904058  | 0.364322606  | 0.418996421  | -0.514636614 | 0.275726040  | 0.661757213  | -0.220224365 | -0.323709717 | 0.550382940  | -0.173389418 | 0.058820563  |
| 2  | ACUTE_MYELOID_LEUKEMIA                               | 0.568638316  | 0.285218787  | -0.085904776 | 0.628209684  | 0.483690884  | 0.188371953  | 0.110711900  | 0.261166414  | 0.208889812  | 0.421901208  | 0.218241684  | 0.373834616  | 0.303194384  | 0.420263387  |
| 3  | ADHERENS_JUNCTION                                    | 0.623860591  | 0.342349306  | 0.054369722  | 0.682829349  | 0.590657446  | 0.310292862  | 0.059890048  | 0.358893992  | 0.366178555  | 0.427539687  | 0.206402821  | 0.511885375  | 0.319875770  | 0.477752938  |
| 4  | ADIPOCYTOKINE_SIGNALING_PATHWAY                      | 0.872631317  | 0.677439033  | 0.462574883  | 0.907167561  | 0.874546465  | 0.680063079  | 0.300320929  | 0.714254260  | 0.697752398  | 0.683574889  | 0.487895853  | 0.813971651  | 0.617361972  | 0.777546469  |
| 5  | ALANINE_ASPARTATE_AND_GLUTAMATE_METABOLISM           | -0.232303866 | 0.075072546  | 0.126393534  | -0.305117759 | -0.313847178 | -0.046677092 | 0.452562067  | -0.028054886 | -0.243979815 | 0.058246441  | 0.295934846  | -0.327185589 | 0.157122298  | -0.067722848 |
| 6  | ALDOSTERONE_REGULATED_SODIUM_REABSORPTION            | 0.413858391  | 0.163290045  | -0.340499361 | 0.466400654  | 0.230327717  | -0.058799075 | 0.228950206  | 0.056844324  | -0.119275022 | 0.388792967  | 0.245754711  | 0.067079046  | 0.262443875  | 0.280488249  |
| 7  | ALLOGRAFT_REJECTION                                  | 0.964707885  | 0.868670302  | 0.500720575  | 0.972055438  | 0.854991942  | 0.720939255  | 0.712608208  | 0.808435069  | 0.591015361  | 0.935443943  | 0.826461765  | 0.726127052  | 0.886270729  | 0.924216850  |
| 8  | ALPHA_LINOLENIC_ACID_METABOLISM                      | 0.430671785  | 0.646539417  | 0.402561541  | 0.368922686  | 0.256937570  | 0.403718225  | 0.933227285  | 0.492068399  | 0.116418693  | 0.699736316  | 0.850843139  | 0.141777938  | 0.751963665  | 0.553291581  |
| 9  | ALZHEIMERS_DISEASE                                   | 0.962268511  | 0.844718079  | 0.669278352  | 0.976520303  | 0.970257301  | 0.848187352  | 0.469469227  | 0.878170099  | 0.823581183  | 0.812161372  | 0.657219875  | 0.916200637  | 0.777247966  | 0.911018668  |
| 10 | AMINO_SUGAR_AND_NUCLEOTIDE_SUGAR_METABOLISM          | 0.863433712  | 0.692749131  | 0.585652016  | 0.892848249  | 0.919530175  | 0.762669801  | 0.235224374  | 0.768459734  | 0.812394664  | 0.641747708  | 0.447562924  | 0.896937622  | 0.595057189  | 0.782148099  |
| 11 | AMINOACYL_TRNA_BIOSYNTHESIS                          | 0.032190772  | 0.315455127  | 0.682854980  | -0.035879394 | 0.161072694  | 0.458812545  | 0.224859441  | 0.381784322  | 0.417542388  | 0.097569968  | 0.240588775  | 0.269220684  | 0.229622664  | 0.189065590  |
| 12 | AMYOTROPHIC_LATERAL_SCLEROSIS_ALS                    | 0.296155059  | -0.017904171 | -0.143370307 | 0.369144640  | 0.341735014  | 0.057600900  | -0.355000899 | 0.059050347  | 0.223463489  | 0.029541719  | -0.207667371 | 0.327824305  | -0.078180256 | 0.128455107  |
| 13 | ANTIGEN_PROCESSING_AND_PRESENTATION                  | 0.779717301  | 0.544442640  | 0.187956831  | 0.824431386  | 0.704777916  | 0.453634021  | 0.311600345  | 0.525270032  | 0.438423666  | 0.640764066  | 0.448108976  | 0.595185418  | 0.543957842  | 0.660699319  |
| 14 | APOPTOSIS                                            | 0.682944850  | 0.434824719  | 0.009822450  | 0.731687364  | 0.564862528  | 0.291580111  | 0.301910469  | 0.382455297  | 0.252737433  | 0.581482695  | 0.400295151  | 0.430884674  | 0.470783754  | 0.555176237  |
| 15 | ARACHIDONIC_ACID_METABOLISM                          | 0.618146312  | 0.366884950  | -0.088964091 | 0.668345516  | 0.478210715  | 0.197088018  | 0.291259798  | 0.297081028  | 0.152844213  | 0.538954727  | 0.366999815  | 0.332983860  | 0.422360425  | 0.487547919  |
| 16 | ARGININE_AND_PROLINE_METABOLISM                      | 0.919861563  | 0.794758346  | 0.786209450  | 0.934680518  | 0.786275720  | 0.619430397  | 0.679806198  | 0.718904247  | 0.489084053  | 0.896421953  | 0.779044988  | 0.641476956  | 0.831322705  | 0.862611150  |
| 17 | ARRHYTHMOGENIC_RIGHT_VENTRICULAR_CARDIOMYOPATHY_ARVC | 0.863276254  | 0.354686750  | 0.340799058  | 0.899530580  | 0.808035793  | 0.589252484  | 0.380587961  | 0.652048156  | 0.566810215  | 0.720541032  | 0.535203423  | 0.709836418  | 0.639721169  | 0.762275585  |
| 18 | ASCORBATE_AND_ALDARATE_METABOLISM                    | 0.604503311  | 0.368046669  | -0.123248026 | 0.650931790  | 0.438519656  | 0.164300984  | 0.350598932  | 0.276112851  | 0.093057706  | 0.559580053  | 0.403607472  | 0.78369483   | 0.443513337  | 0.481625062  |
| 19 | ASTHMA                                               | 0.948352463  | 0.801779164  | 0.480313011  | 0.968876009  | 0.879630910  | 0.709988217  | 0.551724546  | 0.779114022  | 0.639702219  | 0.849996557  | 0.698739901  | 0.773675140  | 0.789365852  | 0.880309371  |
| 20 | AUTOIMMUNE_THYROID_DISEASE                           | 0.788810239  | 0.558044553  | 0.193814286  | 0.832212335  | 0.708717624  | 0.460224408  | 0.333862954  | 0.534466281  | 0.437782287  | 0.656855838  | 0.467768746  | 0.595722173  | 0.560850900  | 0.672340958  |
| 21 | AXON_GUIDANCE                                        | 0.291148987  | -0.014612832 | -0.080982123 | 0.362609286  | 0.368006480  | 0.100149158  | -0.401276647 | 0.085499585  | 0.287400519  | 0.001863210  | -0.238247905 | 0.375472907  | -0.096801045 | 0.128212356  |
| 22 | B_CELL_RECEPTOR_SIGNALING_PATHWAY                    | 0.708975148  | 0.447458455  | 0.147554116  | 0.761668040  | 0.669319320  | 0.404461564  | 0.160377120  | 0.457779647  | 0.437243846  | 0.525704540  | 0.312267300  | 0.583876754  | 0.425093488  | 0.574928627  |
| 23 | BASAL_CELL_CARCINOMA                                 | 0.103322447  | 0.414950103  | 0.555059466  | 0.025396523  | 0.097563887  | 0.384022008  | 0.559570728  | 0.374559004  | 0.214028995  | 0.304681081  | 0.497162202  | 0.117034857  | 0.422412672  | 0.275493637  |
| 24 | BASAL_TRANSCRIPTION_FACTORS                          | -0.194040101 | 0.123754673  | 0.235149847  | -0.269516226 | -0.241069476 | 0.044553009  | 0.433570598  | 0.046630570  | -0.133863007 | 0.069303332  | 0.301065725  | -0.232912113 | 0.179018941  | -0.022914267 |
| 25 | BASE_EXCISION_REPAIR                                 | -0.266189658 | 0.049777799  | 0.175085266  | -0.340079782 | -0.310145166 | -0.024263370 | 0.375658607  | -0.025736448 | -0.192572690 | -0.001869315 | 0.233696322  | -0.296513881 | 0.107135587  | -0.097070251 |
| 26 | BETA_ALANINE_METABOLISM                              | -0.994574634 | -0.952290847 | -0.770854997 | -0.978693335 | -0.919596870 | -0.648620532 | -0.958699449 | -0.835230323 | -0.913026683 | -0.810170156 | -0.914330663 | -0.902328665 | -0.984805351 | -0.984805351 |
| 27 | BIOSYNTHESIS_OF_UNSATURATED_FATTY_ACIDS              | 0.047687836  | 0.336122373  | 0.681530768  | -0.022061732 | 0.163465375  | 0.462213265  | 0.266637129  | 0.391897622  | 0.406410745  | 0.127283428  | 0.275965478  | 0.262770044  | 0.258926637  | 0.207489064  |
| 28 | BLADDER_CANCER                                       | 0.448324194  | 0.272594588  | -0.30220926  | 0.481191730  | 0.203603948  | -0.033107289 | 0.475111068  | 0.110279828  | -0.183242314 | 0.525309828  | 0.444182414  | 0.005599261  | 0.415922502  | 0.355891352  |
| 29 | BUTANOATE_METABOLISM                                 | -0.547172418 | -0.336261461 | 0.202650978  | -0.587679553 | -0.341487543 | -0.081131235 | -0.420400457 | -0.209740491 | 0.029355261  | -0.558936430 | -0.436600782 | -0.160706740 | -0.444496142 | -0.437155867 |
| 30 | CALCIUM_SIGNALING_PATHWAY                            | -0.072146213 | -0.347808698 | -0.225679554 | -0.001505544 | 0.076755022  | -0.137920487 | -0.733354032 | -0.200492787 | 0.125917410  | -0.382295951 | -0.593702954 | 0.152205662  | -0.458884954 | -0.222881963 |
| 31 | CARDIAC_MUSCLE_CONTRACTION                           | -0.538444861 | -0.275136419 | 0.182784438  | -0.592754954 | -0.394865114 | -0.102798040 | -0.224502087 | -0.202860202 | -0.069088382 | -0.460190663 | -0.287963710 | -0.250185921 | -0.337673837 | -0.400150958 |
| 32 | CELL_ADHESION_MOLECULES_CAMS                         | 0.556752109  | 0.263426633  | -0.029021739 | 0.619576601  | 0.519412550  | 0.227990356  | 0.003308828  | 0.277262605  | 0.292724646  | 0.361101748  | 0.138961828  | 0.440253685  | 0.247615207  | 0.403216733  |
| 33 | CELL_CYCLE                                           | -0.564077463 | -0.276833529 | -0.097524046 | -0.626174902 | -0.590893237 | -0.322417700 | 0.096424874  | -0.339720813 | -0.434849091 | -0.313578968 | -0.077075231 | -0.553697036 | -0.214678210 | -0.414556724 |
| 34 | CHEMOKINE_SIGNALING_PATHWAY                          | 0.573567033  | 0.317933156  | -0.146158839 | 0.625420974  | 0.426776440  | 0.140423994  | 0.266062615  | 0.242733332  | 0.097029379  | 0.500820495  | 0.331551859  | 0.278935165  | 0.380891481  | 0.439929345  |
| 35 | CHRONIC_MYELOID_LEUKEMIA                             | 0.462262655  | 0.254078551  | -0.297451065 | 0.503194142  | 0.241944256  | -0.018526213 | 0.392033263  | 0.114735332  | -0.134184051 | 0.494945414  | 0.385228060  | 0.056165621  | 0.378038040  | 0.352451235  |
| 36 | CIRCADIAN_RHYTHM_MAMMAL                              | 0.955903099  | 0.822457172  | 0.483313527  | 0.972909806  | 0.873541218  | 0.712283671  | 0.601091863  | 0.787763222  | 0.623801331  | 0.877983404  | 0.738266598  | 0.759522072  | 0.819788428  | 0.895933704  |
| 37 | CITRATE_CYCLE_TCA_CYCLE                              | 0.351180083  | 0.631029066  | 0.718268085  | 0.277238997  | 0.343493194  | 0.596032600  | 0.681464754  | 0.596387736  | 0.417256826  | 0.516519444  | 0.669228900  | 0.346308124  | 0.623934084  | 0.905932902  |
| 38 | COLORECTAL_CANCER                                    | 0.246164360  | 0.326121499  | -0.164011459 | 0.218919488  | -0.042780946 | -0.050706229 | 0.803568730  | 0.096177878  | -0.345213029 | 0.543998775  | 0.654810139  | -0.236059345 | 0.521282289  | 0.290728245  |
| 39 | COMPLEMENT_AND_COAGULATION_CASCADES                  | 0.644034613  | 0.370228053  | 0.027032801  | 0.700365407  | 0.578097351  | 0.295697101  | 0.143553255  | 0.360779108  | 0.319614528  | 0.481102708  | 0.272276142  | 0.477694652  | 0.370288283  | 0.502128525  |
| 40 | CYSTEINE_AND_METHIONINE_METABOLISM                   | -0.174615870 | 0.127084039  | 0.500814619  | -0.244296393 | -0.063523080 | 0.249744432  | 0.142067458  | 0.174595713  | 0.204293163  | -0.066821204 | 0.109556305  | 0.045153510  | 0.067088321  | -0.101614912 |
| 41 | CYTOKINE_CYTOKINE_RECEPTOR_INTERACTION               | 0.660245823  | 0.426777870  | -0.047446417 | 0.705275400  | 0.507499242  | 0.238782104  | 0.370051534  | 0.345500663  | 0.171451118  | 0.601406603  | 0.440959286  | 0.353430132  | 0.489460145  | 0.539885274  |
| 42 | CYTOSOLIC_DNA_SENSING_PATHWAY                        | 0.690174438  | 0.425294365  | 0.190926061  | 0.744486488  | 0.688007978  | 0.430489728  | 0.075836671  | 0.464790519  | 0.496753814  | 0.471929602  | 0.247534136  | 0.627619444  | 0.372029903  | 0.554367814  |
| 43 | DILATED_CARDIOMYOPATHY                               | 0.771231822  | 0.567194795  | 0.105807264  | 0.807465307  | 0.625469601  | 0.384272764  | 0.478891968  | 0.489324098  | 0.297478893  | 0.717604592  | 0.565100896  | 0.473036156  | 0.619059799  | 0.668579100  |
| 44 | DNA_REPLICATION                                      | -0.41322537  | -0.106773639 | 0.045879476  | -0.482446163 | -0.449734485 | -0.168389871 | 0.246727696  | -0.177400150 | -0.312261650 | -0.151762327 | 0.087524639  | -0.424708672 | -0.046174663 | -0.251207105 |
| 45 | DORSO_VENTRAL_AXIS_FORMATION                         | 0.116718193  | -0.195977985 | -0.250984234 | 0.192463961  | 0.188889532  | -0.083967917 | -0.523630869 | -0.101055580 | 0.119263247  | -0.160833354 | -0.390022690 | 0.201469391  | -0.264477013 | -0.052438682 |
| 46 | DRUG_METABOLISM_CYTOCHROME_P450                      | 0.618060147  | 0.349912714  | -0.054034434 | 0.672872057  | 0.513271896  | 0.225939622  | 0.203172301  | 0.309345313  | 0.218367034  | 0.495916859  | 0.303497828  | 0.389396264  | 0.379625593  | 0.478550110  |
| 47 | DRUG_METABOLISM_OTHER_ENZYMES                        | 0.585847079  | 0.311003678  | -0.088679814 | 0.642815357  | 0.483091814  | 0.190643517  | 0.167193169  | 0.272370929  | 0.109097433  | 0.459704795  | 0.265042752  | 0.361553817  | 0.340996092  | 0.442246202  |
| 48 | ECM_RECEPTOR_INTERACTION                             | 0.899328625  | 0.770942374  | 0.331283193  | 0.915089364  | 0.752956496  | 0.579910089  | 0.683342205  | 0.685286966  | 0.442871656  | 0.886781592  | 0.772481291  | 0.600576509  | 0.817831581  | 0.839883018  |
| 49 | ENDOCYTOSIS                                          | 0.351977756  | 0.037844146  | -0.132377586 | 0.423843144  | 0.375970178  | 0.085039882  | -0.278398312 | 0.098856498  | 0.228430598  | 0.101097224  | -0.101297781 | 0.345179611  | -0.0102      |              |

|     | Pathways                                                 | cluster | Afatinib     | Erlotinib HCl | Dacomitinib  | Gefitinib    | Lapatinib    | Neratinib    | CO-1686      | Everolimus    | BYL719       | Pilralisib   | XL765        | Pazopanib HCl | Sunitinib Malate |
|-----|----------------------------------------------------------|---------|--------------|---------------|--------------|--------------|--------------|--------------|--------------|---------------|--------------|--------------|--------------|---------------|------------------|
| 59  | FOLATE_BIOSYNTHESIS                                      | C1      | -0.320957654 | -0.266162661  | -0.715245038 | -0.492206218 | -0.803719165 | -0.452819498 | -0.424967191 | -0.761695322  | -0.710787866 | -0.621386640 | -0.766225186 | -0.411338962  | -0.098547453     |
| 60  | FRUCTOSE_AND_MANNOSE_METABOLISM                          | C3      | 0.159508783  | 0.390986866   | -0.500247369 | 0.211766579  | -0.265831561 | -0.097668377 | -0.267331430 | -0.200658284  | -0.091563762 | -0.040097923 | -0.169179855 | 0.225661970   | 0.446594888      |
| 61  | GALACTOSE_METABOLISM                                     | C2      | 0.969147315  | 0.948460391   | 0.590765022  | 0.757041274  | 0.698477023  | 0.862301726  | 0.700134798  | 0.742560687   | 0.755722518  | 0.861733213  | 0.704704364  | 0.941271291   | 0.998055484      |
| 62  | GAP_JUNCTION                                             | C3      | -0.153726350 | -0.454930046  | -0.136950296 | -0.766307255 | -0.634486921 | -0.069564569 | 0.148345885  | -0.624423645  | -0.696353615 | -0.515487037 | -0.718230863 | -0.475564262  | -0.165729920     |
| 63  | GLIOMA                                                   | C1      | -0.578223731 | -0.347074833  | -0.950145770 | -0.397266824 | -0.822580561 | -0.749898518 | -0.785987361 | -0.790299046  | -0.695086545 | -0.714497287 | -0.735143750 | -0.507478662  | -0.314449300     |
| 64  | GLUTATHIONE_METABOLISM                                   | C2      | 0.797555077  | 0.543046273   | 0.998771362  | 0.475212094  | 0.845998155  | 0.924643534  | 0.936511438  | 0.834025674   | 0.744438744  | 0.824335738  | 0.759047258  | 0.676847433   | 0.576006906      |
| 65  | GLYCEROLIPID_METABOLISM                                  | C2      | 0.923395028  | 0.775630129   | 0.588424695  | 0.478042633  | 0.499664898  | 0.862877030  | 0.788826146  | 0.543912908   | 0.523402466  | 0.694615223  | 0.468590412  | 0.772167186   | 0.928641898      |
| 66  | GLYCEROPHOSPHOLIPID_METABOLISM                           | C2      | 0.996513101  | 0.928433480   | 0.744640875  | 0.772865651  | 0.816634864  | 0.939791914  | 0.801386325  | 0.848379009   | 0.839078998  | 0.935944803  | 0.803067732  | 0.958951238   | 0.962026114      |
| 67  | GLYCINE_SERINE_AND_THREONINE_METABOLISM                  | C2      | 0.707255446  | 0.528377219   | 0.331302158  | 0.154942926  | 0.132791691  | 0.642651734  | 0.628325212  | 0.182762819   | 0.161238514  | 0.367570257  | 0.096679837  | 0.489459003   | 0.757931426      |
| 68  | GLYCOLYSIS_GLUconeogenesis                               | C2      | 0.750221845  | 0.741207857   | 0.208116634  | 0.437748413  | 0.241490364  | 0.591507895  | 0.463650617  | 0.303412062   | 0.336246570  | 0.487734644  | 0.260820604  | 0.664382566   | 0.882472850      |
| 69  | GLYCOSAMINOGLYCAN_BIOSYNTHESIS_CHONDROITIN_SULFATE       | C2      | 0.976283301  | 0.810297128   | 0.738289190  | 0.561360129  | 0.657732501  | 0.949436257  | 0.876318734  | 0.691817664   | 0.658008858  | 0.810609273  | 0.616302872  | 0.839653441   | 0.930051339      |
| 70  | GLYCOSAMINOGLYCAN_BIOSYNTHESIS_HEPARAN_SULFATE           | C3      | 0.091871084  | 0.164024524   | -0.470427803 | -0.121059914 | -0.474298964 | -0.094420189 | -0.152076477 | -0.413774253  | -0.229683577 | -0.426507902 | 0.014631894  | 0.331858083   |                  |
| 71  | GLYCOSAMINOGLYCAN_BIOSYNTHESIS KERATAN_SULFATE           | C2      | 0.727427579  | 0.463453789   | 0.486275021  | 0.091883539  | 0.194162529  | 0.725329563  | 0.759771698  | 0.232364071   | 0.178683633  | 0.396450897  | 0.127373807  | 0.462703028   | 0.708810395      |
| 72  | GLYCOSAMINOGLYCAN_DEGRADATION                            | C3      | 0.517513616  | 0.153575118   | 0.462508121  | -0.216149622 | 0.011303962  | 0.597036444  | 0.731531386  | 0.032397559   | -0.058100705 | 0.169324152  | -0.091218469 | 0.181051182   | 0.437901461      |
| 73  | GLYCOSPHINGOLIPID_BIOSYNTHESIS_GANGLIO_SERIES            | C3      | 0.561085512  | 0.246547029   | 0.397559711  | -0.139624424 | 0.006540531  | 0.595335353  | 0.891596026  | 0.037912187   | -0.032153043 | 0.196530484  | -0.077051398 | 0.249002155   | 0.527257523      |
| 74  | GLYCOSPHINGOLIPID_BIOSYNTHESIS_GLOBO_SERIES              | C3      | 0.487021617  | 0.065370244   | 0.804253123  | -0.149864556 | 0.327455713  | 0.695913357  | 0.677452062  | 0.309420265   | 0.170983606  | 0.331873472  | 0.186673569  | 0.181227617   | 0.242231143      |
| 75  | GLYCOSPHINGOLIPID_BIOSYNTHESIS_LACTO_AND_NEOLACTO_SERIES | C1      | -0.813404675 | -0.848064486  | -0.756442526 | -0.910909594 | -0.990724122 | -0.787607486 | -0.616544386 | -0.996279226  | -0.997963336 | -0.978295342 | -0.997329896 | -0.918381894  | -0.727901885     |
| 76  | GLYCOSYLPHOSPHATIDYLINOSITOL_GPI_ANCHOR_BIOSYNTHESIS     | C1      | -0.593801464 | -0.846520567  | -0.336549442 | -0.985954731 | -0.805914957 | -0.450970876 | -0.184625131 | -0.825169146  | -0.899416132 | -0.810724522 | -0.885042016 | -0.842994392  | -0.645650014     |
| 77  | GLYOXYLATE_AND_DICARBOXYLATE_METABOLISM                  | C3      | -0.025285995 | 0.394667499   | -0.582134053 | 0.462023686  | -0.075971855 | -0.301469882 | -0.556723225 | -0.030053763  | 0.028578111  | 0.069416812  | 0.245215303  | 0.258787782   |                  |
| 78  | GNRH_SIGNALING_PATHWAY                                   | C2      | 0.720389334  | 0.354570949   | 0.943169540  | 0.180076802  | 0.605408910  | 0.883145474  | 0.979159852  | 0.595411126   | 0.478237505  | 0.620817973  | 0.486884774  | 0.483011655   | 0.4950508395     |
| 79  | GRAFT_VERSUS_HOST_DISEASE                                | C2      | 0.806595706  | 0.487997709   | 0.721449681  | 0.168160001  | 0.402055974  | 0.865319724  | 0.918297980  | 0.424917461   | 0.343819010  | 0.547127103  | 0.331591414  | 0.538642288   | 0.703796244      |
| 80  | HEDGEHOG_SIGNALING_PATHWAY                               | C1      | -0.591859422 | -0.294177820  | -0.396295044 | 0.093309341  | -0.030838212 | -0.612149195 | -0.692396331 | -0.065164882  | -0.001427952 | -0.228762681 | 0.046661580  | -0.291200481  | -0.569246494     |
| 81  | HEMATOPOIETIC_CELL_LINEAGE                               | C3      | 0.854399872  | 0.138211944   | 0.622638033  | -0.187613653 | 0.143635231  | 0.675662941  | 0.831164708  | 0.151577714   | 0.039128124  | 0.253186160  | 0.022181603  | 0.205221891   | 0.400163659      |
| 82  | HERPES_SIMPLEX_VIRUS_1_INFECTION                         | C2      | 0.565253692  | 0.544089094   | 0.816402222  | 0.264353981  | 0.529889481  | 0.926779855  | 0.966180701  | 0.547421970   | 0.643368834  | 0.648429179  | 0.438577428  | 0.613157633   | 0.727223869      |
| 83  | HISTIDINE_METABOLISM                                     | C2      | -0.007395117 | -0.447108753  | 0.355342094  | -0.663966064 | -0.236504494 | 0.216206099  | 0.491548725  | -0.259783023  | -0.396296082 | -0.236387743 | -0.377385602 | -0.357379006  | -0.203508790     |
| 84  | HOMOLOGOUS_RECOMBINATION                                 | C3      | -0.221322958 | 0.099438810   | -0.121443574 | 0.477374927  | 0.344972587  | -0.276036196 | -0.438218541 | 0.320741748   | 0.392870011  | 0.172766298  | 0.431029465  | 0.114670725   | 0.206450417      |
| 85  | HUMAN_PAPILLOMAVIRUS_INFECTION                           | C2      | 0.863384497  | 0.572009756   | 0.754423592  | 0.269165551  | 0.484823771  | 0.907879891  | 0.933451551  | 0.509315694   | 0.435988735  | 0.628727182  | 0.402738879  | 0.626237031   | 0.765462851      |
| 86  | HUNTINGTONS_DISEASE                                      | C2      | 0.670862706  | 0.736348511   | 0.706952094  | 0.880343553  | 0.977394502  | 0.664603257  | 0.499574937  | 0.971140397   | 0.974448256  | 0.911259598  | 0.988949905  | 0.891305349   | 0.567116572      |
| 87  | HYPERTROPHIC_CARDIOMYOPATHY_HCM                          | C2      | 0.764141701  | 0.422106539   | 0.718585262  | 0.100592945  | 0.362521038  | 0.840798011  | 0.916023646  | 0.381832536   | 0.292347517  | 0.498989769  | 0.263833489  | 0.478917846   | 0.647875721      |
| 88  | INOSITOL_PHOSPHATE_METABOLISM                            | C1      | -0.523552458 | -0.391002440  | -0.872793749 | -0.523616155 | -0.878771690 | -0.662526308 | -0.646749933 | -0.845064950  | -0.776324819 | -0.743606924 | -0.820380373 | -0.542182924  | -0.285892512     |
| 89  | INSULIN_SIGNALING_PATHWAY                                | C2      | 0.993459185  | 0.873926238   | 0.730116110  | 0.657653376  | 0.719174227  | 0.946856032  | 0.841524126  | 0.754267663   | 0.733558576  | 0.865118628  | 0.691854637  | 0.899248917   | 0.959970270      |
| 90  | INTESTINAL_IMMUNE_NETWORK_FOR_IGA_PRODUCTION             | C2      | 0.732944732  | 0.410746135   | 0.614036744  | 0.059364444  | 0.263219045  | 0.782543370  | 0.851627957  | 0.289981009   | 0.211891522  | 0.428768092  | 0.173988563  | 0.443846423   | 0.654912467      |
| 91  | JAK_STAT_SIGNALING_PATHWAY                               | C3      | 0.518397761  | 0.116652327   | 0.570687906  | -0.221972200 | 0.087531817  | 0.639796621  | 0.797048649  | 0.098050098   | -0.010607456 | 0.208035898  | -0.030949805 | 0.173832667   | 0.388340517      |
| 92  | LEISHMANIA_INFECTION                                     | C2      | 0.737847646  | 0.444046361   | 0.556822113  | 0.081790675  | 0.235844399  | 0.761492392  | 0.812304523  | 0.268471836   | 0.202389965  | 0.420294734  | 0.157629594  | 0.460719815   | 0.688828474      |
| 93  | LEUKOCYTE_TRANSENDOTHELIAL_MIGRATION                     | C2      | 0.596334555  | 0.284781410   | 0.427960999  | -0.098690574 | 0.048803350  | 0.628366416  | 0.716301274  | 0.080624150   | 0.011189956  | 0.238823866  | 0.091269949  | 0.289646973   | 0.5599773054     |
| 94  | LIMONENE_AND_PINENE_DEGRADATION                          | C1      | -0.159369619 | -0.374510956  | 0.496039148  | -0.181291609 | 0.285807620  | 0.092217003  | 0.251590712  | 0.220470537   | 0.115682062  | 0.055578515  | 0.193931048  | -0.209915534  | -0.443153589     |
| 95  | LINOLEIC_ACID_METABOLISM                                 | C2      | 0.525045717  | 0.663404343   | -0.126663171 | 0.422435664  | 0.053502034  | 0.294876929  | 0.116535800  | 0.121730341   | 0.202521695  | 0.301205964  | 0.121106710  | 0.535984368   | 0.749538098      |
| 96  | LONG_TERM_DEPRESSION                                     | C1      | -0.724880626 | -0.624554358  | -0.907369322 | -0.697533766 | -0.970574714 | -0.805819439 | -0.734084782 | -0.954495872  | -0.904716278 | -0.897905211 | -0.928106313 | -0.750082443  | -0.535040787     |
| 97  | LONG_TERM_POTENTIATION                                   | C1      | -0.833489200 | -0.676441109  | -0.960298332 | -0.663515286 | -0.948593491 | -0.912676613 | -0.857090160 | -0.941106086  | -0.880813217 | -0.922719674 | -0.892349317 | -0.795711111  | -0.647826730     |
| 98  | LYSINE_DEGRADATION                                       | C3      | -0.137575052 | 0.172495885   | -0.043190240 | 0.542460311  | 0.425431897  | -0.191083778 | -0.361894821 | 0.402301877   | 0.471131300  | 0.257552054  | 0.508172634  | 0.194634975   | -0.132903555     |
| 99  | LYSOSOME                                                 | C2      | 0.689840297  | 0.384781404   | 0.519995269  | 0.014428649  | 0.172881628  | 0.761975738  | 0.786403719  | 0.204668914   | 0.135607081  | 0.357954960  | 0.091331319  | 0.399263731   | 0.641641196      |
| 100 | MAPK_SIGNALING_PATHWAY                                   | C3      | 0.577902829  | 0.181625533   | 0.623424447  | -0.151084585 | 0.161291470  | 0.695873922  | 0.638787819  | 0.172392676   | 0.064784107  | 0.280981142  | 0.044241222  | 0.243293974   | 0.442991938      |
| 101 | MAPK_SIGNALING_PATHWAY.1                                 | C3      | 0.538064113  | 0.181930245   | 0.664523815  | -0.190218847 | 0.025760211  | 0.610024971  | 0.735975969  | 0.048643021   | -0.038702901 | 0.189071937  | -0.073801067 | 0.206492690   | 0.464388041      |
| 102 | MATURITY_ONSET_DIABETES_OF_THE_YOUNG                     | C1      | -0.774922200 | -0.732494545  | -0.856764283 | -0.803424110 | -0.996740079 | -0.810696399 | -0.694118522 | -0.989716292  | -0.961667244 | -0.948503220 | -0.975128896 | -0.836202377  | -0.627247780     |
| 103 | MELANOGENESIS                                            | C3      | 0.326114626  | -0.124578827  | 0.707506798  | -0.314216092 | 0.183094926  | 0.558266720  | 0.778989024  | 0.158368884   | 0.012934294  | 0.167654786  | 0.035778465  | 0.005256480   | 0.074340473      |
| 104 | MELANOMA                                                 | C3      | -0.049080757 | -0.449393926  | 0.159379449  | -0.729569860 | -0.419286431 | 0.118229677  | 0.377714116  | -0.426786442  | -0.540229320 | -0.357841141 | -0.541098857 | -0.407807996  | -0.168318774     |
| 105 | METABOLISM_OF_XENOBIOTICS_BY_CYTOCHROME_P450             | C3      | 0.413166000  | 0.006197017   | 0.479809385  | -0.336760133 | -0.033089114 | 0.540174571  | 0.719963102  | -0.024046884  | -0.133687458 | 0.085882983  | -0.152982802 | 0.056263413   | 0.291044310      |
| 106 | MISMATCH_REPAIR                                          | C1      | -0.283511370 | -0.026872713  | -0.147250063 | 0.412929469  | 0.297143469  | -0.324688328 | -0.469191840 | 0.269188756   | 0.336630027  | 0.113253683  | 0.378925832  | 0.045676760   | -0.276814220     |
| 107 | MTOR_SIGNALING_PATHWAY                                   | C3      | 0.678926442  | 0.071853334   | 0.726660596  | -0.276235897 | 0.209552166  | 0.599224577  | 0.809680085  | 0.188357709   | 0.045321129  | 0.207323097  | 0.063980941  | 0.054295285   | 0.132178211      |
| 108 | N_GLYCAN_BIOSYNTHESIS                                    | C2      | 0.688191438  | 0.502167796   | 0.961140056  | 0.542984900  | 0.905384881  | 0.865799405  | 0.806828526  | 0.882519636   | 0.804694746  | 0.821449841  | 0.637428055  | 0.647413945   | 0.456381592      |
| 109 | NATURAL_KILLER_CELL_MEDIATED_CYTOTOXICITY                | C3      | 0.508473238  | 0.127250954   | 0.498083865  | -0.231894471 | 0.028929739  | 0.605817019  | 0.752490955  | 0.045682333</ |              |              |              |               |                  |

| Pathways                                                    | Axitinib     | Tivozanib    | Vandetanib   | Regorafenib  | Selumetinib  | Trametinib   | Crizotinib   | Cabozantinib | Foretinib    | Palbociclib HCl | Ribociclib   | Abemaciclib  | Veliparib    | Olaparib     |
|-------------------------------------------------------------|--------------|--------------|--------------|--------------|--------------|--------------|--------------|--------------|--------------|-----------------|--------------|--------------|--------------|--------------|
| 59 FOLATE_BIOSYNTHESIS                                      | -0.358180537 | -0.507522664 | -0.080214431 | -0.105293891 | -0.031959489 | -0.572584546 | -0.721124026 | -0.442991161 | -0.481874754 | -0.100071650    | -0.385102904 | -0.719822849 | -0.621541828 | -0.072647109 |
| 60 FRUCTOSE_AND_MANNOSE_METABOLISM                          | -0.107563743 | -0.094829473 | -0.556651808 | -0.663977661 | -0.519376750 | -0.786305990 | -0.424390259 | -0.007127669 | -0.024712230 | -0.429672288    | -0.901801340 | -0.087572287 | -0.113267308 | -0.499096652 |
| 61 GALACTOSE_METABOLISM                                     | 0.954671852  | -0.920420682 | 0.944428027  | 0.944227374  | 0.984338336  | -0.721034680 | 0.665337381  | 0.921431777  | 0.927805351  | 0.999018785     | -0.652809154 | 0.715308903  | 0.858684511  | 0.989738794  |
| 62 GAP_JUNCTION                                             | -0.152785372 | -0.465631456 | -0.360061902 | -0.162898056 | -0.033277775 | 0.408532673  | -0.219195852 | -0.181599026 | -0.286612296 | -0.139048125    | 0.230151672  | -0.754313644 | -0.392693499 | -0.209257335 |
| 63 GLIOMA                                                   | -0.619054002 | -0.621685131 | -0.174155526 | -0.057126384 | -0.224927662 | 0.261508762  | -0.934803047 | -0.695585902 | -0.688133620 | -0.330700315    | -0.395883105 | -0.663601182 | -0.778959821 | -0.258048301 |
| 64 GLUTATHIONE_METABOLISM                                   | 0.828414215  | 0.770764189  | 0.406222718  | 0.335135693  | 0.514306561  | 0.073676725  | 0.997196023  | 0.879489691  | 0.858778395  | 0.594594929     | 0.164885365  | 0.694761405  | 0.898444216  | 0.517491050  |
| 65 GLYCEROLIPID_METABOLISM                                  | 0.912541617  | 0.763565555  | 0.794846150  | 0.859575121  | 0.958191749  | 0.832656556  | 0.629219774  | 0.874942242  | 0.841691367  | 0.940594386     | -0.520445402 | 0.460529753  | 0.741645961  | 0.900520742  |
| 66 GLYCEROPHOSPHOLIPID_METABOLISM                           | 0.992960079  | 0.966414659  | 0.884272791  | 0.855217301  | 0.927923711  | 0.577572082  | 0.808381554  | 0.981190684  | 0.986279040  | 0.966316632     | -0.492920983 | 0.796524198  | 0.946668521  | 0.942185161  |
| 67 GLYCINE_SERINE_AND_THREONINE_METABOLISM                  | 0.689820805  | 0.462965144  | 0.605127726  | 0.742503111  | 0.839299923  | 0.937439120  | 0.348970120  | 0.632511819  | 0.573490587  | 0.773507911     | -0.492855085 | 0.092386431  | 0.433767114  | 0.730078641  |
| 68 GLYCOLYSIS_GLUconeogenesis                               | 0.718976244  | 0.599589264  | 0.830715043  | 0.928917784  | 0.938477390  | 0.970899099  | 0.271136107  | 0.645936684  | 0.628000683  | 0.884037077     | -0.784564202 | 0.290969362  | 0.491164383  | 0.884710536  |
| 69 GLYCOSAMINOGLYCAN_BIOSYNTHESIS_CHONDROITIN_SULFATE       | 0.974194904  | 0.853558467  | 0.789095963  | 0.815509002  | 0.932759999  | 0.697538269  | 0.777438110  | 0.955944663  | 0.929324603  | 0.942873979     | -0.416377754 | 0.596741686  | 0.860213012  | 0.895290597  |
| 70 GLYCOSAMINOGLYCAN_BIOSYNTHESIS_HEPARAN_SULFATE           | 0.047752324  | -0.093047848 | 0.344152790  | 0.516970090  | 0.448259833  | 0.852689397  | -0.438333903 | -0.050315443 | -0.078610162 | 0.328498311     | -0.685711779 | -0.371739942 | -0.241287386 | 0.358392629  |
| 71 GLYCOSAMINOGLYCAN_BIOSYNTHESIS KERATAN_SULFATE           | 0.721725444  | 0.467066648  | 0.507707128  | 0.636272980  | 0.783071166  | 0.835201799  | 0.483643432  | 0.683983163  | 0.611795199  | 0.730980974     | -0.300388856 | 0.100658730  | 0.491276283  | 0.663587546  |
| 72 GLYCOSAMINOGLYCAN_DEGRADATION                            | 0.524030497  | 0.215816855  | 0.185927479  | 0.33209614   | 0.526701623  | 0.656322595  | 0.417822053  | 0.504674370  | 0.407448056  | 0.468385397     | 0.015884924  | -0.142091881 | 0.302673852  | 0.375459732  |
| 73 GLYCOSPHINGOLIPID_BIOSYNTHESIS_GANGLIO_SERIES            | 0.559261028  | 0.262610377  | 0.300522398  | 0.455782383  | 0.621358882  | 0.769800260  | 0.369314618  | 0.525081003  | 0.435371463  | 0.553915151     | -0.143347550 | -0.113422247 | 0.312916887  | 0.474869134  |
| 74 GLYCOSPHINGOLIPID_BIOSYNTHESIS_GLOBO_SERIES              | 0.523396459  | 0.290018351  | -0.033431659 | 0.007707031  | 0.259000730  | 0.127230806  | 0.735276912  | 0.568308420  | 0.483910447  | 0.276938636     | 0.475239307  | 0.096087982  | 0.481251586  | 0.158310402  |
| 75 GLYCOSPHINGOLIPID_BIOSYNTHESIS_LACTO_AND_NEOLACTO_SERIES | -0.821801575 | -0.948838572 | -0.732636428 | -0.594649663 | -0.623668706 | -0.085909542 | -0.827343667 | -0.848401998 | -0.897087556 | -0.722672756    | 0.289871322  | -0.990702407 | -0.946135461 | -0.720846500 |
| 76 GLYCOSYLPHOSPHATIDYLINOSITOL_GPI_ANCHOR_BIOSYNTHESIS     | -0.581050796 | -0.812210839 | -0.785829211 | -0.639835069 | -0.541254456 | -0.093150006 | -0.444543441 | -0.578264164 | -0.666447765 | -0.623212833    | 0.580023344  | -0.926858111 | -0.704418379 | -0.681571607 |
| 77 GLYOXYLATE_AND_DICARBOXYLATE_METABOLISM                  | -0.073284455 | -0.115225640 | 0.508290519  | 0.488291945  | 0.253965599  | 0.324191088  | -0.477887453 | -0.145849732 | -0.065991076 | 0.225392481     | -0.849024829 | 0.169465831  | -0.118291441 | 0.339915217  |
| 78 GNRH_SIGNALING_PATHWAY                                   | 0.752498265  | 0.582496187  | 0.250191528  | 0.249176328  | 0.476148738  | 0.197554548  | 0.909423779  | 0.795012717  | 0.735966624  | 0.518931808     | 0.272089321  | 0.408360572  | 0.740286230  | 0.415789202  |
| 79 GRAFT_VERSUS_HOST_DISEASE                                | 0.815073640  | 0.580686060  | 0.474634337  | 0.557495121  | 0.745481982  | 0.654907640  | 0.709812853  | 0.806064255  | 0.735947389  | 0.729595139     | -0.116974118 | 0.263326465  | 0.656283674  | 0.644156508  |
| 80 HEDGEHOG_SIGNALING_PATHWAY                               | -0.587847323 | -0.299401723 | -0.351134318 | -0.504306518 | -0.661682731 | -0.800836595 | -0.374798769 | -0.550245389 | -0.464447547 | -0.594520356    | 0.196219645  | 0.078814132  | -0.338790853 | -0.519861575 |
| 81 HEMATOPOIETIC_CELL_LINEAGE                               | 0.563277905  | 0.269326582  | 0.127121848  | 0.240659714  | 0.465305390  | 0.497032006  | 0.568042729  | 0.566867179  | 0.470318780  | 0.433578433     | 0.179600912  | -0.045816733 | 0.398453663  | 0.326641850  |
| 82 HERPES_SIMPLEX_VIRUS_1_INFECTION                         | 0.869126877  | 0.666302134  | 0.504102598  | 0.555933738  | 0.747294844  | 0.570962692  | 0.809387286  | 0.871482629  | 0.801780627  | 0.752045938     | -0.083284418 | 0.386325874  | 0.752229196  | 0.666319159  |
| 83 HISTIDINE_METABOLISM                                     | 0.024637660  | -0.265780329 | -0.470964278 | -0.359854871 | -0.132715999 | 0.032909595  | 0.246844650  | 0.056827482  | -0.050827252 | -0.167172793    | 0.654286432  | -0.462862219 | -0.074186814 | -0.281136707 |
| 84 HOMOLOGOUS_RECOMBINATION                                 | -0.219130895 | 0.106468200  | -0.014458829 | -0.177187495 | -0.329795490 | -0.654069671 | -0.064923714 | -0.182199032 | -0.078878151 | -0.234342891    | -0.017019809 | 0.466969137  | -0.047591831 | -0.157043115 |
| 85 HUMAN_PAPILLOMAVIRUS_INFECTION                           | 0.870684993  | 0.661738936  | 0.551762830  | 0.618538393  | 0.795759367  | 0.657970163  | 0.563816014  | 0.861819044  | 0.801214659  | 0.788844742     | -0.173324289 | 0.358788202  | 0.726478034  | 0.709697543  |
| 86 HUNTINGTONS_DISEASE                                      | 0.684196046  | 0.858709010  | 0.600240345  | 0.430537864  | 0.443704891  | -0.124648995 | 0.772819254  | 0.725226084  | 0.785841759  | 0.559105250     | 0.168462675  | 0.981073828  | 0.867237817  | 0.564354347  |
| 87 HYPERTROPHIC_CARDIOMYOPATHY_HCM                          | 0.775269041  | 0.527536294  | 0.406423511  | 0.494167349  | 0.693211895  | 0.620185860  | 0.697663265  | 0.770078959  | 0.694040706  | 0.675625949     | -0.049020511 | 0.210116028  | 0.617148587  | 0.584205999  |
| 88 INOSITOL_PHOSPHATE_METABOLISM                            | -0.560990955 | -0.644228564 | -0.210082256 | -0.053780284 | -0.171558627 | 0.371269454  | -0.876626562 | -0.639182720 | -0.658808296 | -0.293834390    | -0.328293670 | -0.764138650 | -0.771092502 | -0.246079129 |
| 89 INSULIN_SIGNALING_PATHWAY                                | 0.989293577  | 0.906862626  | 0.847774347  | 0.854245721  | 0.949441406  | 0.672851693  | 0.781785858  | 0.970833873  | 0.957765266  | 0.968828809     | -0.475347495 | 0.677990976  | 0.896730427  | 0.932730895  |
| 90 INTESTINAL_IMMUNE_NETWORK_FOR_IGA_PRODUCTION             | 0.737543297  | 0.475610534  | 0.422669803  | 0.534331611  | 0.717045418  | 0.713887257  | 0.596443687  | 0.718605059  | 0.639999067  | 0.681448502     | -0.133445327 | 0.129555843  | 0.542357836  | 0.597030683  |
| 91 JAK_STAT_SIGNALING_PATHWAY                               | 0.533799104  | 0.231308423  | 0.117877916  | 0.243151179  | 0.461850771  | 0.530016414  | 0.515671398  | 0.531904701  | 0.433186883  | 0.421507272     | 0.155806502  | -0.095635441 | 0.352677708  | 0.316872539  |
| 92 LEISHMANIA_INFECTION                                     | 0.737345528  | 0.479302965  | 0.471502233  | 0.591104011  | 0.756575681  | 0.777670090  | 0.547141299  | 0.709079330  | 0.633753781  | 0.713226104     | -0.219557587 | 0.129181869  | 0.542638543  | 0.637065793  |
| 93 LEUKOCYTE_TRANSENDOTHELIAL_MIGRATION                     | 0.594672779  | 0.304040693  | 0.334276939  | 0.483661987  | 0.649643464  | 0.775372862  | 0.543169498  | 0.561313704  | 0.473959130  | 0.586288207     | -0.159386282 | -0.070240482 | 0.253309786  | 0.507576718  |
| 94 LIMONENE_AND_PINENE_DEGRADATION                          | -0.107884503 | -0.080723653 | -0.542727275 | -0.657912124 | -0.521088199 | -0.803034951 | 0.424068672  | -0.006895290 | -0.019565564 | -0.427632942    | 0.887609589  | 0.114730116  | 0.122411216  | -0.493047842 |
| 95 LINOIC_ACID_METABOLISM                                   | 0.480327980  | 0.430718797  | 0.792237873  | 0.887741095  | 0.808326987  | 0.928249444  | -0.044801895 | 0.389112426  | 0.396404686  | 0.739563401     | -0.932665652 | 0.183306586  | 0.255559404  | 0.781360131  |
| 96 LONG_TERM_DEPRESSION                                     | -0.751986902 | -0.828908633 | -0.466858022 | -0.325253122 | -0.428202776 | 0.125742698  | -0.936510227 | -0.809421005 | -0.833421437 | -0.540496622    | -0.074416447 | -0.886083402 | -0.913295271 | -0.501730691 |
| 97 LONG_TERM_POTENTIATION                                   | -0.858153678 | -0.872321527 | -0.537164724 | -0.432925808 | -0.564197494 | -0.057459203 | -0.985316090 | -0.904738558 | -0.910363104 | -0.658207381    | -0.017860499 | -0.845845796 | -0.959755440 | -0.605760667 |
| 98 LYSINE_DEGRADATION                                       | -0.134389746 | 0.190340287  | 0.197313674  | -0.118469828 | -0.261545979 | -0.624802991 | -0.127967011 | -0.095854972 | 0.007849858  | -0.160091466    | -0.038290487 | 0.541616435  | 0.134711999  | -0.086396084 |
| 99 LYSOSOME                                                 | 0.689533636  | 0.418019041  | 0.418426414  | 0.548399116  | 0.716942057  | 0.772945282  | 0.503865421  | 0.660420356  | 0.579996737  | 0.667106948     | -0.188539342 | 0.054164481  | 0.467573440  | 0.588659249  |
| 100 MAPK_SIGNALING_PATHWAY                                  | 0.592694481  | 0.302348419  | 0.174646153  | 0.289171262  | 0.508464492  | 0.536404551  | 0.574316724  | 0.593493056  | 0.499032127  | 0.475535414     | 0.130043663  | 0.020430320  | 0.422197807  | 0.371531367  |
| 101 MAPK_SIGNALING_PATHWAY.1                                | 0.543373561  | 0.238372265  | 0.216072254  | 0.362817371  | 0.552621004  | 0.677288623  | 0.423496959  | 0.521989880  | 0.426534876  | 0.494232938     | -0.014286808 | -0.122530797 | 0.319447249  | 0.403341035  |
| 102 MATURITY_ONSET_DIABETES_OF_THE_YOUNG                    | -0.794364809 | -0.895322217 | -0.590245943 | -0.447253552 | -0.519371635 | 0.037857355  | -0.904706654 | -0.839483212 | -0.874919146 | -0.628072947    | 0.082634342  | -0.947879708 | -0.943125016 | -0.604927475 |
| 103 MELANOGENESIS                                           | 0.365135389  | 0.118728438  | -0.205238826 | -0.153144867 | 0.100488762  | 0.033998069  | 0.621584882  | 0.414174720  | 0.322480304  | 0.110490987     | 0.596255754  | -0.059115192 | 0.325221694  | -0.011283519 |
| 104 MELANOMA                                                | -0.030375001 | -0.349552772 | -0.418301206 | -0.259728132 | -0.064433547 | 0.234601231  | 0.059165327  | -0.026279154 | -0.138826143 | -0.134408302    | 0.471955446  | -0.607801443 | -0.204928279 | -0.234538462 |
| 105 METABOLISM_OF_XENOBIOTICS_BY_CYTOCHROME_P450            | 0.428046411  | 0.111189107  | 0.019906961  | 0.160587493  | 0.376382225  | 0.508132898  | 0.415345759  | 0.423990737  | 0.319438389  | 0.324911837     | 0.201442712  | 0.217493480  | 0.234737719  | 0.220163977  |
| 106 MISMATCH_REPAIR                                         | -0.279338328 | 0.041732510  | -0.059441251 | -0.249156924 | -0.398100962 | -0.703603691 | -0.098424480 | -0.238938111 | -0.138634596 | -0.303815893    | 0.044937799  | 0.411699089  | -0.007496382 | -0.229017831 |
| 107 MTOR_SIGNALING_PATHWAY                                  | 0.414227061  | 0.164229870  | -0.148986221 | -0.093761739 | 0.159761891  | 0.087622815  | 0.645513633  | 0.459537331  | 0.367943802  | 0.168190284     | 0.547214776  | -0.028986215 | 0.363699431  | 0.046962601  |
| 108 N_GLYCAN_BIOSYNTHESIS                                   | 0.725253973  | 0.745781241  | 0.337886866  | 0.215918137  | 0.362461258  | -0.154634076 | 0.966159634  |              |              |                 |              |              |              |              |

|     | Pathways                                                 | Erismodegib  | Vismodegib   | Temozolomide | Ibrutinib    | RXDX-101      | Ruxolitinib   | Alectinib    | Vemurafenib  | Dabrafenib   | Nilotinib    | Dasatinib    | Bosutinib    | ABT-199      | Dovitinib    |
|-----|----------------------------------------------------------|--------------|--------------|--------------|--------------|---------------|---------------|--------------|--------------|--------------|--------------|--------------|--------------|--------------|--------------|
| 59  | FOLATE_BIOSYNTHESIS                                      | -0.186699719 | -0.405981531 | -0.130501245 | -0.127307688 | 0.024989506   | -0.118464543  | -0.837734300 | -0.218366252 | 0.178205054  | -0.509268285 | -0.692678664 | 0.152248392  | -0.553512894 | -0.307522713 |
| 60  | FRUCTOSE_AND_MANNOSE_METABOLISM                          | 0.211271993  | 0.136249642  | 0.168416617  | 0.230195454  | 0.488530041   | 0.490747005   | -0.460357762 | 0.362823876  | 0.730752663  | -0.104184048 | -0.245507854 | 0.651576542  | -0.077992947 | 0.175540177  |
| 61  | GALACTOSE_METABOLISM                                     | 0.957425343  | 0.961436290  | 0.880739173  | 0.942234173  | 0.982895891   | 0.978625576   | 0.620193229  | 0.993805651  | 0.907730795  | 0.871039564  | 0.789391606  | 0.951558712  | 0.885433056  | 0.972900520  |
| 62  | GAP_JUNCTION                                             | 0.024116148  | -0.294874141 | -0.500186898 | 0.101556940  | 0.004163337   | -0.298099665  | -0.433624156 | -0.271804521 | -0.156921778 | -0.167439878 | -0.367825684 | -0.039150782 | -0.291792705 | -0.150587272 |
| 63  | GLIOMA                                                   | -0.508872241 | -0.602694270 | -0.141711870 | -0.474685644 | -0.252705297  | -0.262469546  | -0.947446093 | -0.400074542 | 0.037199233  | -0.767887702 | -0.857356542 | -0.068786749 | -0.758865737 | -0.564912662 |
| 64  | GLUTATHIONE_METABOLISM                                   | 0.761097815  | 0.794324951  | 0.335270442  | 0.738437057  | 0.543791809   | 0.503855538   | 0.959967749  | 0.632509802  | 0.242089817  | 0.927927271  | 0.947621397  | 0.366928986  | 0.905484047  | 0.787712689  |
| 65  | GLYCEROLIPID_METABOLISM                                  | 0.973103897  | 0.865311053  | 0.678879845  | 0.984687044  | 0.972599409   | 0.857124899   | 0.506843630  | 0.891166639  | 0.819824321  | 0.836334493  | 0.689095525  | 0.913355800  | 0.803587559  | 0.927273263  |
| 66  | GLYCEROPHOSPHOLIPID_METABOLISM                           | 0.968316621  | 0.996754108  | 0.821659280  | 0.946148440  | 0.932595190   | 0.934253206   | 0.773381225  | 0.978964164  | 0.801090461  | 0.952728778  | 0.902664147  | 0.863089829  | 0.964802509  | 0.996774921  |
| 67  | GLYCINE_SERINE_AND_THREONINE_METABOLISM                  | 0.816353886  | 0.609049622  | 0.464020976  | 0.855251384  | 0.858032652   | 0.663958445   | 0.172624385  | 0.677334463  | 0.724820240  | 0.587128340  | 0.377297407  | 0.825084813  | 0.523434226  | 0.714223430  |
| 68  | GLYCOLYSIS_GLYCONEOGENESIS                               | 0.812237503  | 0.695247001  | 0.739699028  | 0.830205006  | 0.935750434   | 0.847884595   | 0.162172299  | 0.816031683  | 0.929584019  | 0.567815372  | 0.393527034  | 0.964539965  | 0.553865248  | 0.760296983  |
| 69  | GLYCOSAMINOGLYCAN_BIOSYNTHESIS_CHONDROITIN_SULFATE       | 0.999178136  | 0.934872060  | 0.682894416  | 0.999052155  | 0.949540085   | 0.860744305   | 0.678121304  | 0.917832096  | 0.759898651  | 0.933632855  | 0.825618845  | 0.860953883  | 0.908205880  | 0.977049432  |
| 70  | GLYCOSAMINOGLYCAN_BIOSYNTHESIS_HEPARAN_SULFATE           | 0.209177834  | 0.013595189  | 0.277744083  | 0.256975986  | 0.437445188   | 0.314351058   | -0.558464131 | 0.216638013  | 0.575538087  | -0.140231255 | -0.344975207 | 0.557695167  | -0.169028992 | 0.106889714  |
| 71  | GLYCOSAMINOGLYCAN_BIOSYNTHESIS KERATAN_SULFATE           | 0.838757473  | 0.621799064  | 0.351431101  | 0.878754262  | 0.812587869   | 0.590781531   | 0.293660094  | 0.639008170  | 0.599998763  | 0.663361987  | 0.464230368  | 0.733447109  | 0.583275236  | 0.731025179  |
| 72  | GLYCOSAMINOGLYCAN_DEGRADATION                            | 0.656004449  | 0.389589396  | 0.013402519  | 0.710066319  | 0.569654556   | 0.288398714   | 0.199242518  | 0.363613035  | 0.291145180  | 0.515622624  | 0.316175699  | 0.456030061  | 0.403817743  | 0.518128088  |
| 73  | GLYCOSPHINGOLIPID_BIOSYNTHESIS_GANGLIO_SERIES            | 0.695877743  | 0.435733189  | 0.132155271  | 0.752966559  | 0.657798264   | 0.390334865   | 0.154137580  | 0.444553366  | 0.423451074  | 0.517377406  | 0.303786251  | 0.517226449  | 0.415396214  | 0.564112503  |
| 74  | GLYCOSPHINGOLIPID_BIOSYNTHESIS_GLOBO_SERIES              | 0.555871839  | 0.403382599  | -0.172280593 | 0.581425129  | 0.311838451   | 0.095238668   | 0.383326003  | 0.240291307  | -0.075992093 | 0.639992495  | 0.564861885  | 0.110977156  | 0.540434855  | 0.464129627  |
| 75  | GLYCOSPHINGOLIPID_BIOSYNTHESIS_LACTO_AND_NEOLACTO_SERIES | -0.697452563 | -0.884170033 | -0.750564763 | -0.640049917 | -0.616864236  | -0.757672967  | -0.907384468 | -0.808974371 | -0.534712673 | -0.844497650 | -0.929815130 | -0.546245002 | -0.905670929 | -0.808573101 |
| 76  | GLYCOSYLPHOSPHATIDYLINOSITOL_GPI_ANCHOR_BIOSYNTHESIS     | -0.452181223 | -0.699893254 | -0.866354498 | -0.385408367 | -0.507745409  | -0.746091165  | -0.590069437 | -0.719542167 | -0.624605544 | -0.532184585 | -0.638850111 | -0.543731215 | -0.640364577 | -0.594676203 |
| 77  | GLYOXYLATE_AND_DICARBOXYLATE_METABOLISM                  | -0.079307927 | 0.040159149  | 0.597779727  | -0.103532150 | 0.200855425   | 0.389146539   | -0.369155246 | 0.241714953  | 0.561386377  | -0.250580568 | -0.244934488 | 0.398194943  | -0.152646968 | -0.012365474 |
| 78  | GNRH_SIGNALING_PATHWAY                                   | 0.747905128  | 0.666519594  | 0.129929626  | 0.753348586  | 0.519576283   | 0.370332075   | 0.795950401  | 0.509709425  | 0.158241316  | 0.850914911  | 0.801434119  | 0.325743622  | 0.782874579  | 0.711416611  |
| 79  | GRAFT_VERSUS_HOST_DISEASE                                | 0.889171829  | 0.716214109  | 0.322140472  | 0.916529190  | 0.781936805   | 0.578243131   | 0.539099542  | 0.666073268  | 0.495795118  | 0.812684205  | 0.659933904  | 0.651479036  | 0.734232576  | 0.805511041  |
| 80  | HEDGEHOG_SIGNALING_PATHWAY                               | -0.726627287 | -0.469747568 | -0.185321862 | -0.778037867 | -0.695867965  | -0.437459034  | -0.163815852 | -0.486644680 | -0.473407855 | -0.537080627 | -0.322731808 | -0.615751470 | -0.440067690 | -0.595443611 |
| 81  | HEMATOPOIETIC_CELL_LINEAGE                               | 0.663401401  | 0.428482843  | -0.041346377 | 0.708781944  | 0.513879765   | 0.244640363   | 0.364297635  | 0.349919816  | 0.180324748  | 0.600467982  | 0.437951046  | 0.361619193  | 0.488613224  | 0.542317936  |
| 82  | HERPES_SIMPLEX_VIRUS_1_INFECTION                         | 0.914788162  | 0.782277995  | 0.363531854  | 0.931521031  | 0.782950807   | 0.609774833   | 0.366193670  | 0.708595048  | 0.485004819  | 0.885277802  | 0.763093241  | 0.863807712  | 0.834262246  | 0.853424938  |
| 83  | HISTIDINE_METABOLISM                                     | 0.120099075  | -0.124765277 | -0.611260175 | 0.175517512  | -0.077672361  | -0.360787431  | 0.066612054  | -0.246948723 | -0.408127186 | 0.131901614  | 0.020117105  | -0.234857805 | 0.002537202  | -0.014726263 |
| 84  | HOMOLOGOUS_RECOMBINATION                                 | -0.391871870 | -0.078353040 | -0.179259046 | -0.462331375 | -0.368185048  | -0.064267791  | 0.165448627  | -0.102918691 | -0.165415455 | -0.181984199 | 0.043528696  | -0.304390310 | -0.062073088 | -0.225145130 |
| 85  | HUMAN_PAPILLOMAVIRUS_INFECTION                           | 0.930545101  | 0.784659704  | 0.408540866  | 0.950719463  | 0.828637320   | 0.650906265   | 0.593548440  | 0.735970197  | 0.555339108  | 0.864025406  | 0.723780171  | 0.702031953  | 0.797183593  | 0.862335766  |
| 86  | HUNTINGTONS_DISEASE                                      | 0.530530291  | 0.762743358  | 0.647283245  | 0.433817996  | 0.464310115   | 0.615135047   | 0.890297287  | 0.667326788  | 0.732084419  | 0.33381595   | 0.865683147  | 0.365269029  | 0.807306718  | 0.664168203  |
| 87  | HYPERTROPHIC_CARDIOMYOPATHY_HCM                          | 0.853353119  | 0.668246797  | 0.249487987  | 0.884045041  | 0.732784873   | 0.514742170   | 0.519582055  | 0.608745827  | 0.431020886  | 0.783522633  | 0.629565050  | 0.594344217  | 0.697632908  | 0.762423506  |
| 88  | INOSITOL_PHOSPHATE_METABOLISM                            | -0.415926526 | -0.581923440 | -0.218856304 | -0.365861809 | -0.187335517  | -0.2731110878 | -0.944425757 | -0.390742982 | 0.031857272  | -0.703341231 | -0.838856069 | -0.032647312 | -0.726116045 | -0.510512740 |
| 89  | INSULIN_SIGNALING_PATHWAY                                | 0.996681405  | 0.968518321  | 0.758951020  | 0.987928397  | 0.960397578   | 0.908856050   | 0.707744582  | 0.957457989  | 0.800883626  | 0.942741236  | 0.854358909  | 0.883931122  | 0.933519375  | 0.994496087  |
| 90  | INTESTINAL_IMMUNE_NETWORK_FOR_IGA_PRODUCTION             | 0.837955407  | 0.627820699  | 0.261339091  | 0.875508690  | 0.754055629   | 0.522938793   | 0.405860731  | 0.599498262  | 0.482550593  | 0.719535860  | 0.540723763  | 0.637984664  | 0.631027322  | 0.733429994  |
| 91  | JAK_STAT_SIGNALING_PATHWAY                               | 0.644780821  | 0.396411022  | -0.052947545 | 0.693934220  | 0.509761578   | 0.232245614   | 0.305283845  | 0.330438062  | 0.188012757  | 0.561174631  | 0.387567287  | 0.366656671  | 0.446834729  | 0.516201874  |
| 92  | LEISHMANIA_INFECTION                                     | 0.845623109  | 0.632558650  | 0.312283237  | 0.884151190  | 0.789901401   | 0.563616128   | 0.356755789  | 0.626537228  | 0.546548415  | 0.699170047  | 0.510127944  | 0.691529727  | 0.614993673  | 0.739865066  |
| 93  | LEUKOCYTE_TRANSENDOTHELIAL_MIGRATION                     | 0.729732442  | 0.474201263  | 0.166951025  | 0.780583765  | 0.685598873   | 0.424765848   | 0.197125195  | 0.480623092  | 0.449031790  | 0.553007453  | 0.342952150  | 0.529739642  | 0.453983963  | 0.599290986  |
| 94  | LIMONENE_AND_PINENE_DEGRADATION                          | -0.218592228 | -0.129853418 | -0.527386488 | -0.240712892 | -0.492258592  | -0.480638727  | 0.469829670  | -0.355388888 | -0.723937862 | 0.103048146  | 0.252742545  | -0.651345529 | 0.082672319  | -0.175409078 |
| 95  | LINOLEIC_ACID_METABOLISM                                 | 0.572783618  | 0.493020254  | 0.747045255  | 0.586525275  | 0.787854573   | 0.763161137   | -0.108382692 | 0.676963542  | 0.921973714  | 0.285892496  | 0.129507104  | 0.891739534  | 0.301470913  | 0.538815554  |
| 96  | LONG_TERM_DEPRESSION                                     | -0.621741069 | -0.779224386 | -0.463570356 | -0.571254333 | -0.4389935009 | -0.526015536  | -0.991996633 | -0.627337882 | -0.242801167 | -0.847833401 | -0.948705283 | -0.302904010 | -0.877832170 | -0.714879410 |
| 97  | LONG_TERM_POTENTIATION                                   | -0.761908369 | -0.860310118 | -0.498985033 | -0.723783011 | -0.581383831  | -0.611989590  | -0.994523787 | -0.719185266 | -0.347056350 | -0.937755798 | -0.988925942 | -0.434378359 | -0.946998439 | -0.824592343 |
| 98  | LYSINE_DEGRADATION                                       | -0.312540214 | 0.006513305  | 0.239179953  | -0.385697204 | -0.298886200  | 0.006217890   | 0.246290162  | -0.025395687 | -0.113137026 | -0.095380264 | 0.130036563  | -0.245120890 | 0.025379663  | -0.141789261 |
| 99  | LYSOSOME                                                 | 0.807040614  | 0.06001793   | 0.255268160  | 0.850081285  | 0.751822748   | 0.511400434   | 0.304937818  | 0.573728679  | 0.506331593  | 0.652350065  | 0.456049361  | 0.654263552  | 0.561890520  | 0.691991379  |
| 100 | MAPK_SIGNALING_PATHWAY                                   | 0.695023336  | 0.461836369  | 0.006031345  | 0.739635462  | 0.555510514   | 0.290103919   | 0.370960301  | 0.391248964  | 0.229995301  | 0.621947283  | 0.455232288  | 0.408330660  | 0.512919774  | 0.575410590  |
| 101 | MAPK_SIGNALING_PATHWAY.1                                 | 0.675050258  | 0.411389762  | 0.044154891  | 0.728227259  | 0.594500659   | 0.317082246   | 0.206265306  | 0.389836227  | 0.321324439  | 0.529883021  | 0.329064638  | 0.483943972  | 0.420385485  | 0.538995851  |
| 102 | MATURITY_ONSET_DIABETES_OF_THE_YOUNG                     | -0.663969267 | -0.837741473 | -0.596608170 | -0.609416655 | -0.522552840  | -0.635345877  | -0.972480106 | -0.716534056 | -0.373225349 | -0.860161286 | -0.956647790 | -0.412830670 | -0.904565201 | -0.766986610 |
| 103 | MELANOGENESIS                                            | 0.406935473  | 0.235506535  | -0.342382418 | 0.439294456  | 0.155958681   | -0.077808645  | 0.464252734  | 0.067264129  | -0.231246960 | 0.495259073  | 0.421940786  | -0.043640300 | 0.385961013  | 0.316239349  |
| 104 | MELANOMA                                                 | 0.109520898  | -0.184892957 | -0.568634846 | 0.178230886  | -0.014565492  | -0.323573365  | -0.152758000 | -0.244231022 | -0.286105816 | 0.022764926  | -0.140128725 | -0.127755421 | -0.111407329 | -0.051490965 |
| 105 | METABOLISM_OF_XENOBIOTICS_BY_CYTOCHROME_P450             | 0.552847112  | 0.283160680  | -0.152328025 | 0.608717264  | 0.425284781   | 0.131412124   | 0.196308362  | 0.224248807  | 0.112384234  | 0.454884844  | 0.273009793  | 0.289727641  | 0.333125681  | 0.411398960  |
| 106 | MISMATCH_REPAIR                                          | -0.450676436 | -0.142644299 | 0.106155553  | -0.519007093 | -0.434925903  | -0.137345192  | 0.130678562  | -0.173504211 | -0.236626941 | -0.233108713 | -0.004176724 | -0.373833833 | -0.117279033 | -0.287829983 |
| 107 | MTOR_SIGNALING_PATHWAY                                   | 0.459172202  | 0.284781628  | -0.290235883 | 0.491551228  | 0.214759342   | -0.020792853  | 0.484073737  |              |              |              |              |              |              |              |



|     | Pathways                                  | cluster | Afatinib     | Erlotinib HCl | Dacomitinib  | Gefitinib    | Lapatinib    | Neratinib    | CO-1686      | Everolimus   | BYL719       | Pilralisib   | XL765        | Pazopanib HCl | Sunitinib Malate |
|-----|-------------------------------------------|---------|--------------|---------------|--------------|--------------|--------------|--------------|--------------|--------------|--------------|--------------|--------------|---------------|------------------|
| 117 | NOTCH_SIGNALING_PATHWAY                   | C1      | -0.792358136 | -0.551570489  | -0.997038380 | -0.499713550 | -0.865041827 | -0.916866927 | -0.921017983 | -0.852126680 | -0.765632940 | -0.836272482 | -0.781781762 | -0.686240667  | -0.571204894     |
| 118 | NUCLEOTIDE_EXCISION_REPAIR                | C3      | -0.117532570 | 0.108628096   | 0.114692327  | 0.483648678  | 0.492252827  | -0.107942852 | -0.230737162 | 0.456962727  | 0.493668284  | 0.289908654  | 0.544494757  | 0.169829237   | -0.183366139     |
| 119 | O_GLYCAN_BIOSYNTHESIS                     | C3      | 0.091045040  | -0.293775538  | 0.181232685  | -0.624041126 | -0.368845225 | 0.219128583  | 0.444053465  | -0.363549409 | -0.465283287 | -0.259998439 | -0.481398347 | -0.270171651  | 0.005459032      |
| 120 | OLFACTORY_TRANSDUCTION                    | C3      | -0.230918123 | -0.301259241  | -0.536386038 | -0.591126233 | -0.774752358 | -0.303404204 | -0.214031524 | -0.737670296 | -0.725700006 | -0.58828285  | -0.777297043 | -0.415337302  | -0.070855955     |
| 121 | ONE_CARBOON_POOL_BY_FOLATE                | C3      | 0.147250090  | 0.368044842   | 0.281252738  | 0.694424119  | 0.689940528  | 0.129107655  | -0.038215965 | 0.666102765  | 0.706039680  | 0.529545262  | 0.743704159  | 0.428769591   | 0.087078442      |
| 122 | OOCYTE_MEIOSIS                            | C1      | -0.295138361 | -0.079296854  | 0.001320819  | 0.312942475  | 0.336119284  | -0.263777147 | -0.347920552 | 0.293891079  | 0.325209059  | 0.112100511  | 0.383541740  | -0.018677618  | -0.365252354     |
| 123 | OTHER_GLYCAN_DEGRADATION                  | C3      | 0.593774947  | 0.314856216   | 0.363900662  | -0.075314294 | 0.019485964  | 0.598919587  | 0.667280905  | 0.056928689  | 0.000577976  | 0.226626620  | -0.051065082 | 0.302817045   | 0.587564295      |
| 124 | OXIDATIVE_PHOSPHORYLATION                 | C2      | 0.961279090  | 0.979333076   | 0.661809537  | 0.878640455  | 0.846681792  | 0.867726596  | 0.681940198  | 0.880319312  | 0.896304830  | 0.955608750  | 0.859796776  | 0.995142425   | 0.960040142      |
| 125 | P53_SIGNALING_PATHWAY                     | C1      | -0.524504855 | -0.531820796  | 0.052299872  | -0.204709315 | 0.056218719  | -0.351093829 | -0.254781767 | -0.008813577 | -0.051689947 | -0.207813484 | 0.028938463  | -0.421794915  | -0.704876287     |
| 126 | PANCREATIC_CANCER                         | C3      | 0.355693211  | -0.011784475  | 0.859199175  | -0.033768026 | 0.500088773  | 0.602310418  | 0.764140380  | 0.458293746  | 0.322254465  | 0.389776517  | 0.369616057  | 0.158749447   | 0.053458109      |
| 127 | PANTOTHENATE_AND_COA_BIOSYNTHESIS         | C2      | 0.723606415  | 0.341688534   | 0.861065128  | 0.095236419  | 0.478408658  | 0.865205638  | 0.971485108  | 0.478670097  | 0.364741193  | 0.542262771  | 0.359669492  | 0.445500064   | 0.529293107      |
| 128 | PARKINSONS_DISEASE                        | C2      | 0.927831814  | 0.954239556   | 0.715341241  | 0.916219914  | 0.926324368  | 0.857956667  | 0.672334877  | 0.949806379  | 0.960964872  | 0.990115850  | 0.937630704  | 0.991734181   | 0.893844976      |
| 129 | PATHOGENIC_ESCHERICHIA_COLI_INFECTION     | C2      | 0.964694626  | 0.755220180   | 0.803127134  | 0.510418994  | 0.671332644  | 0.972026851  | 0.927799740  | 0.698539714  | 0.647972456  | 0.804605082  | 0.614005493  | 0.803939536   | 0.882800772      |
| 130 | PATHWAYS_IN_CANCER                        | C3      | 0.552687815  | 0.140509442   | 0.653189769  | -0.174711451 | 0.173905118  | 0.691190319  | 0.848300375  | 0.179431073  | 0.063717833  | 0.273790520  | 0.049833769  | 0.1248605031  | 0.395803126      |
| 131 | PENTOSE_AND_GLUCURONATE_INTERCONVERSIONS  | C3      | 0.485288142  | 0.074029122   | 0.566962715  | -0.257837893 | 0.068380984  | 0.617916437  | 0.787006478  | 0.075946870  | -0.037009545 | 0.179346363  | -0.053991956 | 0.135862384   | 0.346133179      |
| 132 | PENTOSE_PHOSPHATE_PATHWAY                 | C2      | 0.925847478  | 0.970128079   | 0.761977774  | 0.926126586  | 0.905220796  | 0.840212030  | 0.644006746  | 0.932172976  | 0.950797512  | 0.980119387  | 0.923399628  | 0.937305901   | 0.909979207      |
| 133 | PEROXISOME                                | C2      | 0.973418823  | 0.970135572   | 0.627383282  | 0.818067207  | 0.770869320  | 0.871623927  | 0.697435656  | 0.810614921  | 0.825196150  | 0.910993803  | 0.780290257  | 0.973209377   | 0.989055618      |
| 134 | PHENYLALANINE_METABOLISM                  | C2      | 0.649705492  | 0.327900815   | 0.981706344  | 0.264359757  | 0.721603772  | 0.833366849  | 0.913747098  | 0.697493665  | 0.582753186  | 0.667658829  | 0.610369062  | 0.481585629   | 0.385608726      |
| 135 | PHYSLATIDYLDINOSITOL_SIGNALING_SYSTEM     | C3      | 0.024302066  | 0.175191319   | -0.570131315 | -0.062562823 | -0.482174342 | -0.191317890 | -0.283559251 | -0.421076293 | -0.335902550 | -0.250012642 | -0.411332424 | 0.008110105   | 0.294309218      |
| 136 | PI3KAKT_SIGNALING_PATHWAY                 | C3      | 0.513064409  | 0.155165119   | 0.443459325  | -0.218205739 | -0.003046183 | 0.586648588  | 0.718278159  | 0.019447181  | -0.068302498 | 0.159852636  | -0.103114939 | 0.178172241   | 0.440992928      |
| 137 | PORPHYRIN_AND_CHLOROPHYLL_METABOLISM      | C3      | 0.516992058  | 0.108269233   | 0.593768557  | -0.221685074 | 0.105483256  | 0.647512925  | 0.809214361  | 0.113521017  | 0.001140273  | 0.216807759  | -0.016168299 | 0.172110161   | 0.375789818      |
| 138 | PPAR_SIGNALING_PATHWAY                    | C3      | 0.511188487  | 0.142746488   | 0.467336088  | -0.224843344 | 0.010389492  | 0.595212935  | 0.733615799  | 0.030402629  | -0.062031169 | 0.164951156  | -0.093905046 | 0.172617360   | 0.427178280      |
| 139 | PRIMARY_BILE_ACID_BIOSYNTHESIS            | C3      | 0.276061081  | -0.135412802  | 0.378697727  | -0.470382524 | -0.165190798 | 0.414921378  | 0.622481974  | -0.160118223 | -0.271933674 | -0.057661426 | -0.287155546 | -0.089590687  | 0.156894932      |
| 140 | PRIMARY_IMMUNODEFICIENCY                  | C3      | 0.448858589  | 0.008069791   | 0.672567667  | -0.264482872 | 0.154342735  | 0.613511805  | 0.824731055  | 0.147065192  | 0.015550513  | 0.208543352  | 0.016839511  | 0.105898254   | 0.249957844      |
| 141 | PRION_DISEASES                            | C3      | 0.125026153  | -0.216459147  | 0.098884347  | -0.575266668 | -0.404569231 | 0.207102730  | 0.399446490  | -0.387879026 | -0.469851453 | -0.257134011 | -0.499420135 | -0.221311869  | 0.089461054      |
| 142 | PROGESTERONE_MEDIATED_OOCYTE_MATURATION   | C1      | -0.554362761 | -0.449800601  | -0.081949976 | -0.077911434 | 0.062005300  | -0.441454906 | -0.409256501 | 0.004238588  | -0.002439131 | -0.195068204 | 0.071411169  | -0.369415082  | -0.675102872     |
| 143 | PROPANOATE_METABOLISM                     | C3      | -0.051551506 | 0.375000797   | -0.592822754 | 0.457323775  | -0.078962611 | -0.324843935 | -0.579550888 | -0.035080490 | 0.114101794  | 0.016091052  | 0.067673436  | 0.227455758   | 0.229928362      |
| 144 | PROSTATE_CANCER                           | C3      | 0.542077757  | 0.195226747   | 0.446989798  | -0.181090320 | 0.018265859  | 0.605188368  | 0.724732845  | 0.043206510  | -0.040144531 | 0.188285111  | -0.077649329 | 0.214319453   | 0.478090083      |
| 145 | PROTEASOME                                | C2      | 0.749637301  | 0.781175873   | 0.763099237  | 0.881686300  | 0.994485825  | 0.745598549  | 0.587648246  | 0.992190237  | 0.988097931  | 0.950716065  | 0.997137382  | 0.864886688   | 0.641881472      |
| 146 | PROTEIN_DIGESTION_AND_ABSORPTION          | C3      | 0.326222110  | -0.114536696  | 0.530817450  | -0.409215477 | -0.021378991 | 0.503145153  | 0.719069416  | -0.026583278 | -0.154753940 | 0.046203044  | -0.157016227 | -0.035093723  | 0.152814436      |
| 147 | PROTEIN_EXPORT                            | C3      | 0.102870502  | 0.507364486   | -0.158215302 | 0.761782997  | 0.426935783  | -0.081183405 | -0.352760875 | 0.440232350  | 0.558351253  | 0.387960937  | 0.552173902  | 0.455752904   | 0.238041209      |
| 148 | PROXIMAL_TUBULE_BICARBONATE_RECLAMATION   | C1      | -0.383234392 | 0.066403781   | -0.665958806 | 0.314918319  | -0.132632545 | -0.585849710 | -0.796261243 | -0.119031376 | 0.018671686  | -0.163572793 | 0.009855326  | -0.041155193  | -0.166953862     |
| 149 | PURINE_METABOLISM                         | C1      | -0.623336695 | -0.884802523  | -0.040346030 | -0.823180670 | -0.450792547 | -0.381273032 | -0.106708851 | -0.506415856 | -0.609750607 | -0.611493198 | -0.548557983 | -0.791223970  | -0.814650293     |
| 150 | PYRIMIDINE_METABOLISM                     | C3      | -0.027631089 | 0.276440393   | 0.036879164  | 0.629437815  | 0.515268229  | -0.088416138 | -0.275435775 | 0.495815014  | 0.564158591  | 0.360965153  | 0.597083095  | 0.301394729   | -0.025718948     |
| 151 | PYRUVATE_METABOLISM                       | C3      | -0.217820166 | 0.092310878   | -0.098382756 | 0.472329679  | 0.357238417  | -0.263915598 | -0.420209058 | 0.312231668  | 0.399100350  | 0.179603025  | 0.439138813  | 0.113193867   | -0.212932992     |
| 152 | REGULATION_OF_ACTIN_CYTOSKELETON          | C3      | 0.519576270  | 0.139180428   | 0.507343857  | -0.219438071 | 0.041672972  | 0.616157884  | 0.760283119  | 0.058607302  | -0.039488629 | 0.185244471  | -0.067610560 | 0.178635313   | 0.419495683      |
| 153 | REGULATION_OF_AUTOPHAGY                   | C3      | 0.494344407  | 0.057966713   | 0.784875103  | -0.162877172 | 0.300650737  | 0.695746259  | 0.877248412  | 0.285697394  | 0.148986317  | 0.318679574  | 0.160679081  | 0.179883069   | 0.260180343      |
| 154 | RENAL_CELL_CARCINOMA                      | C3      | 0.505656686  | 0.104303261   | 0.555203395  | -0.236713581 | 0.068933182  | 0.626131727  | 0.785504718  | 0.079736661  | -0.028415909 | 0.191042717  | -0.049207919 | 0.159368133   | 0.378613897      |
| 155 | RENIN_ANGIOTENSIN_SYSTEM                  | C2      | 0.612679492  | 0.209604064   | 0.701706063  | -0.098983490 | 0.248026688  | 0.745392642  | 0.885822677  | 0.254521958  | 0.141124512  | 0.347921866  | 0.126637255  | 0.287200910   | 0.453245370      |
| 156 | RETINOL_METABOLISM                        | C3      | 0.328527654  | -0.046013727  | 0.318757348  | -0.412099783 | -0.183006228 | 0.424238524  | 0.599816707  | -0.166706686 | -0.260902758 | -0.036820977 | -0.289387276 | -0.052775133  | 0.254528802      |
| 157 | RIBOFLAVIN_METABOLISM                     | C1      | -0.454275269 | -0.763281971  | -0.191546478 | -0.946078212 | -0.713045570 | -0.294963894 | -0.018882206 | -0.730574580 | -0.820833111 | -0.702232712 | -0.809167528 | -0.745236019  | -0.532867684     |
| 158 | RIBOSOME                                  | C3      | 0.271856573  | -0.180787882  | 0.673101318  | -0.363778021 | 0.137536042  | 0.510412801  | 0.887183196  | 0.110616365  | -0.036193447 | 0.114873630  | -0.010929267 | -0.051027630  | 0.018778359      |
| 159 | RIG_I_LIKE_RECEPTOR_SIGNALING_PATHWAY     | C2      | 0.759880425  | 0.431353582   | 0.670239350  | 0.094667998  | 0.323244447  | 0.819862518  | 0.877313177  | 0.346979568  | 0.264521854  | 0.476076207  | 0.230577502  | 0.475487774   | 0.664709211      |
| 160 | RNA_DEGRADATION                           | C1      | -0.476695570 | -0.202964215  | -0.242212048 | 0.194124681  | 0.123345468  | -0.479065087 | -0.565745038 | 0.085666458  | 0.138726707  | -0.087760288 | 0.191363301  | -0.177443248  | -0.489289657     |
| 161 | RNA_POLYMERASE                            | C1      | -0.472676359 | -0.039513314  | -0.814862978 | 0.146050855  | -0.343018388 | -0.688598709 | -0.871630983 | -0.322102516 | -0.182128677 | -0.335009293 | -0.201498555 | -0.174064749  | -0.219164038     |
| 162 | SELENOAMINO_ACID_METABOLISM               | C3      | 0.285037548  | 0.671573879   | -0.083880715 | 0.851587983  | 0.490846347  | 0.073675656  | -0.219212724 | 0.5717128068 | 0.637412875  | 0.506345836  | 0.615180212  | 0.607648880   | 0.440519213      |
| 163 | SMALL_CELL_LUNG_CANCER                    | C2      | 0.770498798  | 0.410314891   | 0.908581282  | 0.190356721  | 0.570842090  | 0.906582986  | 0.990534455  | 0.510193802  | 0.460796058  | 0.624043982  | 0.457792095  | 0.519908410   | 0.571252728      |
| 164 | SNARE_INTERACTIONS_IN_VESICULAR_TRANSPORT | C3      | 0.337794274  | -0.103786211  | 0.545682289  | -0.396249399 | -0.004208881 | 0.515917212  | 0.730201740  | -0.009743808 | -0.138552848 | 0.061709614  | -0.140325644 | -0.022206458  | 0.161257174      |
| 165 | SPHINGOLIPID_METABOLISM                   | C3      | -0.113040817 | -0.277829021  | -0.348241769 | -0.609817702 | -0.687003264 | -0.139734825 | -0.013143922 | -0.653982782 | -0.672376090 | -0.500621610 | -0.720294186 | -0.362256413  | -0.008416928     |
| 166 | SPLICEOSOME                               | C1      | -0.333213638 | -0.126291355  | -0.015828907 | 0.267399797  | 0.301199190  | -0.293292605 | 0.364984967  | 0.256945565  | 0.284888474  | 0.071732184  | 0.345357168  | -0.063950878  | -0.407964805     |
| 167 | STAPHYLOCOCCUS_AUREUS_INFECTION           | C2      | 0.626444440  | 0.251881977   | 0.614202426  | -0.092288830 | 0.183111040  | 0.721524572  | 0.842306126  | 0.199881908  | 0.101687484  | 0.320849640  | 0.07467572   |               |                  |

| Pathways                                      | Axitinib     | Tivozanib    | Vandetanib   | Regorafenib  | Selumetinib  | Trametinib   | Crizotinib   | Cabozantinib | Foretinib    | Palbociclib HCl | Ribociclib   | Abemaciclib  | Veliparib    | Olaparib     |
|-----------------------------------------------|--------------|--------------|--------------|--------------|--------------|--------------|--------------|--------------|--------------|-----------------|--------------|--------------|--------------|--------------|
| 117 NOTCH_SIGNALING_PATHWAY                   | -0.823315520 | -0.779876540 | -0.410745308 | -0.331052524 | -0.503893436 | -0.047282401 | -0.998218043 | -0.875997141 | -0.859850201 | -0.588591124    | -0.162176945 | -0.719018821 | -0.904947273 | -0.514753457 |
| 118 NUCLEOTIDE_EXCISION_REPAIR                | -0.102381264 | -0.197455905 | -0.018662416 | -0.227004108 | -0.320405315 | -0.733956571 | -0.155108018 | -0.043600746 | -0.047625215 | -0.204080485    | -0.156886662 | -0.555410446 | -0.195125565 | -0.154139638 |
| 119 O_GLYCAN_BIOSYNTHESIS                     | 0.102430227  | -0.228884202 | -0.243907823 | -0.070110891 | 0.117870112  | 0.419482435  | 0.097047272  | 0.091066420  | -0.020928384 | 0.038259548     | 0.296784125  | -0.538884410 | -0.112676082 | -0.057218329 |
| 120 OLFACTORY_TRANSDUCTION                    | -0.258684842 | -0.483352211 | -0.131157058 | 0.075925146  | 0.071728838  | 0.610988120  | -0.565909367 | -0.333183248 | -0.399276918 | -0.062243334    | -0.238279529 | -0.755788963 | -0.544089042 | -0.068198827 |
| 121 ONE_CARBOON_POOL_BY_FOLATE                | 0.158858198  | 0.451685096  | 0.237625845  | 0.026940358  | -0.055254283 | -0.546137630 | 0.342027315  | 0.209572489  | 0.303153986  | 0.066572725     | -0.015937767 | 0.757117193  | 0.433638505  | 0.113918535  |
| 122 OOCYTE_MEIOSIS                            | -0.277646100 | 0.012475432  | -0.200350626 | -0.398198660 | -0.492876819 | -0.836591317 | 0.024846559  | -0.214950273 | -0.130025340 | -0.384881875    | 0.278959205  | 0.391182438  | 0.023650826  | -0.336485144 |
| 123 OTHER_GLYCAN_DEGRADATION                  | 0.586911240  | 0.303544123  | 0.379713689  | 0.535611860  | 0.682010104  | 0.831483246  | 0.347342477  | 0.544383996  | 0.461363270  | 0.611390744     | -0.245343507 | -0.078009465 | 0.330340809  | 0.542039582  |
| 124 OXIDATIVE_PHOSPHORYLATION                 | 0.952737547  | 0.987261775  | 0.936736704  | 0.882628236  | 0.910351606  | 0.529479710  | 0.743663855  | 0.937610577  | 0.964211889  | 0.957192451     | -0.585839338 | 0.868725385  | 0.934671709  | 0.955322305  |
| 125 P53_SIGNALING_PATHWAY                     | -0.486697205 | -0.337480196 | -0.665861356 | -0.807841495 | -0.793782396 | -0.994501880 | 0.002158621  | -0.398764227 | -0.370709652 | -0.705915677    | 0.774763725  | -0.010561834 | -0.211605231 | -0.714549437 |
| 126 PANCREATIC_CANCER                         | 0.404412872  | 0.293362967  | -0.164646894 | -0.216914725 | 0.009433955  | -0.294697944 | 0.793156276  | 0.485227733  | 0.434660295  | 0.081549940     | 0.675933597  | 0.274227127  | 0.509384443  | -0.023790377 |
| 127 PANTOTHENATE_AND_COA_BIOSYNTHESIS         | 0.749034578  | 0.529409207  | 0.273245628  | 0.316243742  | 0.544505259  | 0.366335428  | 0.825060517  | 0.773929642  | 0.701164248  | 0.559601782     | 0.186260623  | 0.286282994  | 0.670971694  | 0.454684261  |
| 128 PARKINSONS_DISEASE                        | 0.92566939   | 0.998526220  | 0.881821601  | 0.792820747  | 0.821094066  | 0.367819000  | 0.795319226  | 0.926542798  | 0.962887505  | 0.889872855     | -0.486047166 | 0.940899658  | 0.963711622  | 0.888313903  |
| 129 PATHOGENIC_ESCHERICHIA_COLI_INFECTION     | 0.968851196  | 0.834188001  | 0.718005713  | 0.740613088  | 0.882650358  | 0.631407964  | 0.830122790  | 0.961117318  | 0.927369126  | 0.899018198     | -0.304118535 | 0.582773270  | 0.869128677  | 0.839311017  |
| 130 PATHWAYS_IN_CANCER                        | 0.572586073  | 0.287733084  | 0.226380850  | 0.455454702  | 0.465267746  | 0.596764393  | 0.580535092  | 0.485087776  | 0.429497601  | 0.206294599     | -0.020896199 | -0.020596605 | 0.320687768  | 0.326877668  |
| 131 PENTOSE_AND_GLUCURONATE_INTERCONVERSIONS  | 0.502568654  | 0.187452518  | 0.071766478  | 0.196292751  | 0.419497827  | 0.492507359  | 0.506774956  | 0.504109827  | 0.403494147  | 0.380064373     | 0.202142537  | -0.121708015 | 0.327579355  | 0.272897765  |
| 132 PENTOSE_PHOSPHATE_PATHWAY                 | 0.920545265  | 0.995908157  | 0.907532589  | 0.823629677  | 0.840887523  | 0.404423243  | 0.760740854  | 0.915708645  | 0.954043139  | 0.904665861     | -0.536815033 | 0.9048081992 | 0.947949936  | 0.908327817  |
| 133 PEROXISOME                                | 0.961486852  | 0.957998347  | 0.948725016  | 0.924230353  | 0.959019251  | 0.640638204  | 0.705867289  | 0.936119439  | 0.951680210  | 0.988300428     | -0.628139199 | 0.790252861  | 0.899820317  | 0.982315627  |
| 134 PHENYLALANINE_METABOLISM                  | 0.689123203  | 0.596318787  | 0.182022415  | 0.122418190  | 0.333030674  | -0.056356970 | 0.951241722  | 0.753349654  | 0.715988722  | 0.409782208     | 0.385506232  | 0.529484194  | 0.767676820  | 0.315466925  |
| 135 PHOSPHATIDYLINOSITOL_SIGNALING_SYSTEM     | -0.024012901 | -0.113088152 | 0.355277435  | 0.508808211  | 0.399359651  | 0.793081978  | -0.525197765 | -0.124779097 | -0.135335204 | 0.284789668     | -0.746980552 | -0.343155909 | -0.288604642 | 0.334374484  |
| 136 PI3KAKT_SIGNALING_PATHWAY                 | 0.518292156  | 0.209574087  | 0.192204199  | 0.342701063  | 0.532091385  | 0.671960310  | 0.400058451  | 0.496452486  | 0.399449080  | 0.471046786     | -0.002561102 | -0.151912905 | 0.291417509  | 0.379990403  |
| 137 PORPHYRYN_AND_CHLOROPHYLL_METABOLISM      | 0.534383397  | 0.234601923  | 0.102222503  | 0.221779393  | 0.445380392  | 0.498675050  | 0.536657205  | 0.536545319  | 0.437942101  | 0.409429696     | 0.187202612  | -0.083768592 | 0.363411821  | 0.302539979  |
| 138 PPAR_SIGNALING_PATHWAY                    | 0.518528674  | 0.209431090  | 0.173020926  | 0.319465481  | 0.515453002  | 0.643721661  | 0.420953413  | 0.500660607  | 0.402756984  | 0.458011126     | 0.032391799  | -0.146161443 | 0.299862898  | 0.363822175  |
| 139 PRIMARY_BILE_ACID_BIOSYNTHESIS            | 0.291634119  | -0.034748305 | -0.112596419 | 0.039709381  | 0.251940024  | 0.446875221  | 0.302207113  | 0.288280784  | 0.178623532  | 0.191375917     | 0.278685404  | -0.352613241 | 0.095173934  | 0.086599779  |
| 140 PRIMARY_IMMUNODEFICIENCY                  | 0.477153704  | 0.194834708  | -0.034715936 | 0.055113662  | 0.300046789  | 0.293175024  | 0.600624756  | 0.501945165  | 0.404074385  | 0.285766486     | 0.385185340  | 0.3645867541 | 0.165427337  | 0.168533366  |
| 141 PRION_DISEASES                            | 0.127329880  | -0.202906292 | -0.138948125 | 0.051272873  | 0.212958659  | 0.554695020  | 0.029108065  | 0.098719582  | -0.009039589 | 0.119039441     | 0.134842245  | -0.542315527 | -0.123859851 | 0.036321932  |
| 142 PROGESTERONE_MEDIATED_OOCYTE_MATURATION   | -0.526191336 | -0.312437635 | -0.568186773 | -0.727959402 | -0.774493840 | -0.983908805 | -0.106726491 | -0.450124991 | -0.397582592 | -0.685219252    | 0.603010359  | 0.055297319  | -0.238918872 | -0.664106857 |
| 143 PROPANOATE_METABOLISM                     | -0.098772628 | 0.098765246  | 0.479152580  | 0.459434541  | 0.221652184  | 0.286700714  | -0.489266297 | -0.168902927 | -0.086703807 | 0.195949191     | -0.828912686 | 0.167739859  | -0.133274825 | 0.312034121  |
| 144 PROSTATE_CANCER                           | 0.545660021  | 0.2411779325 | 0.234532961  | 0.383963171  | 0.568185342  | 0.700351576  | 0.408760195  | 0.521092759  | 0.507235528  | -0.044411751    | -0.123476609 | 0.315616719  | 0.419039388  | 0.018892461  |
| 145 PROTEASOME                                | 0.762670139  | 0.905761870  | 0.649909216  | 0.495852936  | 0.527623109  | -0.032210136 | 0.827379217  | 0.799829551  | 0.851225691  | 0.636719139     | -0.194070954 | 0.985403438  | 0.918970550  | 0.633020549  |
| 146 PROTEIN_DIGESTION_AND_ABSORPTION          | 0.350992403  | 0.043621650  | -0.130767117 | -0.011836782 | 0.224285868  | 0.319494977  | 0.449818001  | 0.366893355  | 0.260605143  | 0.189111504     | 0.395285597  | -0.235725522 | 0.205902034  | 0.074097026  |
| 147 PROTEIN_EXPORT                            | 0.080787299  | 0.390667236  | 0.486667766  | 0.337950098  | 0.140125006  | -0.148758321 | -0.052154358 | 0.069218765  | 0.180670305  | 0.203900336     | -0.546165406 | 0.622804353  | 0.233851276  | 0.305573615  |
| 148 PROXIMAL_TUBULE_BICARBONATE_RECLAMATION   | -0.415343836 | -0.138474093 | 0.118905971  | 0.036684559  | -0.212707779 | -0.203075651 | -0.586071422 | -0.447916522 | -0.349598215 | -0.203408703    | -0.472068817 | 0.097389697  | -0.322718561 | -0.083505657 |
| 149 PURINE_METABOLISM                         | -0.584873006 | -0.698432735 | -0.940640625 | -0.918333037 | -0.793626062 | -0.634727360 | -0.157414635 | -0.521470181 | -0.581192384 | -0.793226405    | 0.952297173  | -0.618429431 | -0.512173288 | -0.861340961 |
| 150 PYRIMIDINE_METABOLISM                     | -0.025015611 | 0.297444614  | 0.178612868  | -0.022231964 | -0.158130489 | -0.559770578 | 0.044781899  | 0.011947693  | 0.116497972  | -0.052535319    | -0.095843036 | 0.630126021  | 0.238780074  | 0.018892461  |
| 151 PYRUVATE_METABOLISM                       | -0.213928441 | 0.109490187  | 0.002086557  | -0.191948342 | -0.338051081 | -0.071407225 | -0.104363802 | -0.171983798 | -0.071985431 | -0.240020336    | 0.009775681  | 0.072208619  | 0.273890738  | -0.165795698 |
| 152 REGULATION_OF_ACTIN_CYTOSKELETON          | 0.529672304  | 0.222613439  | 0.159209032  | 0.298237172  | 0.502514524  | 0.608101525  | 0.458346538  | 0.517232722  | 0.419048984  | 0.451164795     | 0.072022297  | -0.124196533 | 0.323602793  | 0.353216013  |
| 153 REGULATION_OF_AUTOPHAGY                   | 0.528708106  | 0.283971841  | -0.018430878 | 0.033435875  | 0.284000166  | 0.175474029  | 0.716446082  | 0.568653139  | 0.481382372  | 0.295078991     | 0.444875004  | 0.071992757  | 0.469477158  | 0.176597200  |
| 154 RENAL_CELL_CARCINOMA                      | 0.520628343  | 0.215615948  | 0.108475402  | 0.236854543  | 0.454405443  | 0.533463088  | 0.499347850  | 0.517697562  | 0.418155990  | 0.411801786     | 0.155796405  | -0.113365565 | 0.335942257  | 0.307509281  |
| 155 RENIN_ANGIOTENSIN_SYSTEM                  | 0.632568040  | 0.356871858  | 0.182396860  | 0.277002934  | 0.504691141  | 0.474289402  | 0.653023495  | 0.616348553  | 0.551186088  | 0.486024281     | 0.173133002  | 0.056051611  | 0.489468275  | 0.378824560  |
| 156 RETINOL_METABOLISM                        | 0.335678508  | 0.008243369  | 0.001684370  | 0.169368212  | 0.359632268  | 0.585797682  | 0.256533199  | 0.316077364  | 0.209935991  | 0.286266732     | 0.120035105  | -0.341744615 | 0.103912675  | 0.192361873  |
| 157 RIBOFLAVIN_METABOLISM                     | -0.438428960 | -0.703204810 | -0.712257203 | -0.559546359 | -0.426426913 | -0.012430874 | -0.302124553 | -0.433416436 | -0.532073734 | -0.505981009    | 0.582777255  | -0.861187536 | -0.577232350 | -0.579901551 |
| 158 RIBOSE                                    | 0.311602535  | 0.063506834  | -0.259922831 | -0.205438782 | 0.047272464  | 0.000480712  | 0.582298404  | 0.361983738  | 0.268780672  | 0.055154062     | 0.633113663  | 0.066926887  | 0.273890738  | -0.066810773 |
| 159 RIG_I_LIKE_RECEPTOR_SIGNALING_PATHWAY     | 0.767308171  | 0.514668091  | 0.429591574  | 0.528246932  | 0.717625083  | 0.674877926  | 0.652792183  | 0.754606242  | 0.678311500  | 0.691546123     | -0.104357801 | 0.182357524  | 0.590496740  | 0.604508335  |
| 160 RNA_DEGRADATION                           | -0.467525064 | -0.170801965 | -0.286687364 | -0.461720282 | -0.598350691 | -0.825840485 | -0.218101240 | -0.419568422 | -0.331576784 | -0.513053709    | 0.223592844  | 0.214999177  | -0.192505683 | -0.446714819 |
| 161 RNA_POLYMERASE                            | -0.510809928 | -0.286857740 | 0.053864263  | 0.021378259  | -0.230202093 | -0.081954170 | -0.744774602 | -0.560034260 | -0.477882890 | -0.253553012    | -0.505600062 | -0.109267712 | -0.483298195 | -0.134864262 |
| 162 SELENOAMINO_ACID_METABOLISM               | 0.257386178  | 0.532221264  | 0.667628480  | 0.542253102  | 0.355702969  | 0.069864553  | 0.033453297  | 0.231322430  | 0.335661759  | 0.407998493     | -0.701356604 | 0.689148587  | 0.358507760  | 0.505467678  |
| 163 SMALL_CELL_LUNG_CANCER                    | 0.796587499  | 0.605358074  | 0.328691422  | 0.571704350  | 0.335519424  | 0.881212087  | 0.825430788  | 0.762331759  | 0.599514266  | 0.162563692     | 0.368158998  | 0.742933149  | 0.499110216  | 0.113897016  |
| 164 SNARE_INTERACTIONS_IN_VESICULAR_TRANSPORT | 0.363023217  | 0.057802415  | -0.122877280 | -0.006822987 | 0.230614565  | 0.315629109  | 0.465324484  | 0.3799979108 | 0.274367571  | 0.197571109     | 0.396445956  | -0.219640389 | 0.221331758  | 0.082114662  |
| 165 SPHINGOLIPID_METABOLISM                   | -0.132607078 | -0.405732952 | -0.128775209 | 0.084608529  | 0.135841286  | 0.636966991  | -0.391854624 | -0.196570149 | -0.280230397 | 0.007672731     | -0.136607501 | 0.718816304  | -0.424316982 | -0.024263764 |
| 166 SPLICEOSOME                               | -0.314599904 | -0.030324147 | -0.246950152 | -0.441598885 | -0.532957808 | -0.860843793 | 0.002407277  | -0.250256884 | -0.168154712 | -0.426817271    | 0.316872603  |              |              |              |



|     | Pathways                                  | Erismodegib  | Vismodegib   | Temozolomide | Ibrutinib    | RXDX-101     | Ruxotinib    | Alectinib    | Vemurafenib  | Dabrafenib   | Nilotinib    | Dasatinib    | Bosutinib    | ABT-199      | Dovitinib    |
|-----|-------------------------------------------|--------------|--------------|--------------|--------------|--------------|--------------|--------------|--------------|--------------|--------------|--------------|--------------|--------------|--------------|
| 117 | NOTCH_SIGNALING_PATHWAY                   | -0.748246989 | -0.795429610 | -0.346759687 | -0.722376466 | -0.531721557 | -0.505167188 | -0.970979225 | -0.632371571 | -0.238251559 | -0.924351761 | -0.953788819 | -0.357288448 | -0.907232237 | -0.782343140 |
| 118 | NUCLEOTIDE_EXCISION_REPAIR                | -0.291795289 | 0.002027460  | 0.127312738  | -0.364496959 | -0.347097380 | -0.067516428 | 0.372216224  | -0.240584586 | -0.017941563 | 0.220321752  | -0.339918848 | -0.087212423 | -0.125213431 |              |
| 119 | O_GLYCAN_BIOSYNTHESIS                     | 0.257146046  | -0.051069905 | -0.406279728 | 0.327425520  | 0.165070948  | -0.150377425 | -0.128881011 | -0.081943555 | -0.094125309 | 0.122140403  | -0.070292901 | 0.064021402  | -0.009921144 | 0.090870252  |
| 120 | OLFACTORY_TRANSDUCTION                    | -0.069020910 | -0.344709511 | -0.222612186 | 0.001537493  | 0.080110176  | -0.134576634 | -0.731648811 | -0.197170023 | 0.129166786  | -0.379610835 | -0.591350079 | 0.155550004  | -0.456140083 | -0.219726033 |
| 121 | ONE_CARBOON_POOL_BY_FOLATE                | -0.031916819 | 0.284155065  | 0.367265102  | -0.109482479 | -0.082359959 | 0.198210260  | 0.548633544  | 0.206816475  | 0.002797014  | 0.222254964  | 0.440783104  | -0.084759746 | 0.332026529  | 0.140442785  |
| 122 | OOCYTE_MEIOSIS                            | -0.458165435 | -0.163162464 | -0.050180981 | -0.524215914 | -0.517589439 | -0.252400087 | 0.238983827  | -0.250776931 | -0.404723269 | -0.180253983 | 0.061646773  | -0.506261266 | -0.083740748 | -0.303243957 |
| 123 | OTHER_GLYCAN_DEGRADATION                  | 0.728532686  | 0.472869166  | 0.216511625  | 0.779834468  | 0.713785086  | 0.460821576  | 0.138587892  | 0.502045527  | 0.508818065  | 0.525095149  | 0.306962384  | 0.644110110  | 0.431608956  | 0.598186684  |
| 124 | OXIDATIVE_PHOSPHORYLATION                 | 0.906227584  | 0.986369177  | 0.905298860  | 0.872809213  | 0.904419016  | 0.964300529  | 0.749206649  | 0.987798547  | 0.838270170  | 0.897806286  | 0.876467330  | 0.864846390  | 0.935393058  | 0.962488207  |
| 125 | P53_SIGNALING_PATHWAY                     | -0.619974025 | -0.450702024 | -0.572889188 | -0.654288972 | -0.789608956 | -0.668661266 | 0.131585438  | -0.610824687 | -0.831388739 | -0.312759865 | -0.107853453 | -0.853359570 | -0.286194222 | -0.537174060 |
| 126 | PANCREATIC_CANCER                         | 0.351131046  | 0.329496042  | -0.240385058 | 0.347058900  | 0.054979916  | -0.050956175 | 0.733965308  | 0.107574271  | -0.310257297 | 0.582041000  | 0.621423241  | -0.157554286 | 0.520373620  | 0.341373227  |
| 127 | PANTOTHENATE_AND_COA_BIOSYNTHESIS         | 0.784910723  | 0.645125263  | 0.130097460  | 0.804535855  | 0.589640435  | 0.394512788  | 0.673908903  | 0.521413123  | 0.234652399  | 0.817242503  | 0.718341509  | 0.410140288  | 0.733702968  | 0.717214656  |
| 128 | PARKINSONS_DISEASE                        | 0.846896037  | 0.971979792  | 0.869500262  | 0.802963120  | 0.814497323  | 0.908771667  | 0.831010708  | 0.943527370  | 0.741297641  | 0.899667995  | 0.920266047  | 0.762097716  | 0.947942600  | 0.926705463  |
| 129 | PATHOGENIC_ESCHERICHIA_COLI_INFECTION     | 0.989549155  | 0.919247865  | 0.605089391  | 0.990562400  | 0.905028477  | 0.801345263  | 0.724216965  | 0.875782120  | 0.676435947  | 0.952460949  | 0.850993293  | 0.793665741  | 0.918038311  | 0.963731974  |
| 130 | PATHWAYS_IN_CANCER                        | 0.665350203  | 0.439051763  | -0.045726266 | 0.708439657  | 0.504690084  | 0.240409464  | 0.398512456  | 0.350858232  | 0.162676758  | 0.618028072  | 0.463931152  | 0.345864455  | 0.507330757  | 0.548917345  |
| 131 | PENTOSE_AND_GLUCURONATE_INTERCONVERSIONS  | 0.612588568  | 0.362525140  | -0.098688068 | 0.662526086  | 0.468760197  | 0.187781122  | 0.296159099  | 0.289487217  | 0.140337027  | 0.538098608  | 0.368429320  | 0.321388023  | 0.427116600  | 0.482562809  |
| 132 | PENTOSE_PHOSPHATE_PATHWAY                 | 0.846782660  | 0.965892529  | 0.896833434  | 0.803574119  | 0.831992505  | 0.929212403  | 0.796705353  | 0.955310395  | 0.776848317  | 0.882271002  | 0.896769050  | 0.390885046  | 0.933512164  | 0.925668285  |
| 133 | PEROXISOME                                | 0.942064921  | 0.980442347  | 0.899079257  | 0.918532054  | 0.955527465  | 0.980178596  | 0.683225913  | 0.999188309  | 0.883917239  | 0.890062040  | 0.834929163  | 0.920281136  | 0.915048596  | 0.976059629  |
| 134 | PHENYLALANINE_METABOLISM                  | 0.630809979  | 0.632066849  | 0.101022692  | 0.617385161  | 0.371596789  | 0.292604429  | 0.895894825  | 0.439941922  | 0.025380847  | 0.823840122  | 0.845137375  | 0.171098771  | 0.780219076  | 0.637745679  |
| 135 | PHOSPHATIDYLINOSITOL_SIGNALING_SYSTEM     | 0.120587955  | -0.033424121 | 0.317181013  | 0.159973929  | 0.379439923  | 0.304660543  | -0.610411524 | 0.187110551  | 0.577848703  | -0.223415579 | -0.402859320 | 0.527867337  | -0.231392487 | 0.040156255  |
| 136 | PI3KAT_SIGNALING_PATHWAY                  | 0.653326370  | 0.384363240  | 0.019805201  | 0.708151910  | 0.574272171  | 0.292669499  | 0.180583012  | 0.364304671  | 0.302786606  | 0.504835976  | 0.301967568  | 0.465301138  | 0.393433983  | 0.514082919  |
| 137 | PORPHYRIN_AND_CHLOROPHYLL_METABOLISM      | 0.639954603  | 0.396497995  | -0.067424619 | 0.494224919  | 0.218864129  | 0.329119326  | 0.321969712  | 0.163815936  | 0.569913847  | 0.403074002  | 0.344878410  | 0.455523973  | 0.514153616  |              |
| 138 | PPAR_SIGNALING_PATHWAY                    | 0.649631131  | 0.383097846  | 0.000390671  | 0.703760728  | 0.559010427  | 0.276585069  | 0.202246920  | 0.353741141  | 0.276562097  | 0.513492723  | 0.315659362  | 0.442915489  | 0.400775598  | 0.511564425  |
| 139 | PRIMARY_BILE_ACID_BIOSYNTHESIS            | 0.426646508  | 0.140227075  | -0.282458248 | 0.488569467  | 0.301905475  | -0.004788376 | 0.078934818  | 0.083772990  | -0.001420962 | 0.323887338  | 0.140713900  | 0.173023923  | 0.195274800  | 0.274331883  |
| 140 | PRIMARY_IMMUNODEFICIENCY                  | 0.554452421  | 0.339823552  | -0.193882823 | 0.595822843  | 0.353466796  | 0.090816785  | 0.411420789  | 0.217486384  | -0.014724297 | 0.559019925  | 0.432426719  | 0.175039691  | 0.444128479  | 0.442539710  |
| 141 | PRION_DISEASES                            | 0.298080415  | -0.019609101 | -0.301550262 | 0.370712581  | 0.254394260  | -0.057357841 | -0.209094798 | -0.011309330 | 0.038589305  | 0.110106412  | -0.104999288 | 0.181926917  | -0.015976389 | 0.127612871  |
| 142 | PROGESTERONE_MEDIATED_OOCYTE_MATURATION   | -0.674169221 | -0.455858669 | -0.442171116 | -0.718853310 | -0.784268939 | -0.600745482 | 0.063355844  | -0.576493894 | -0.735208733 | -0.385357832 | -0.161119878 | -0.802043168 | -0.329340731 | -0.564688315 |
| 143 | PROPANOATE_METABOLISM                     | -0.110086359 | 0.017858811  | 0.580191522  | -0.135948035 | 0.167856625  | 0.363904183  | -0.373864681 | 0.216258293  | 0.532998276  | -0.271694922 | -0.257535695 | 0.366076167  | -0.171232852 | -0.038936229 |
| 144 | PROSTATE_CANCER                           | 0.679997903  | 0.415300823  | 0.063119345  | 0.733481323  | 0.608849786  | 0.332941993  | 0.191423707  | 0.401219299  | 0.344775908  | 0.525269396  | 0.320801259  | 0.504071120  | 0.417211997  | 0.543527903  |
| 145 | PROTEASOME                                | 0.623183541  | 0.828460353  | 0.678150711  | 0.562081625  | 0.521600642  | 0.675118346  | 0.921725610  | 0.733767297  | 0.432938407  | 0.806523234  | 0.915473099  | 0.442749208  | 0.870099224  | 0.743274981  |
| 146 | PROTEIN_DIGESTION_AND_ABSORPTION          | 0.454803715  | 0.203030851  | -0.295179860 | 0.507109881  | 0.278003636  | -0.011053931 | 0.243375555  | 0.102502563  | -0.069352625 | 0.420019143  | 0.271056417  | 0.116962811  | 0.294839428  | 0.321392322  |
| 147 | PROTEIN_EXPORT                            | -0.049737238 | 0.233980205  | -0.630249863 | -0.116532822 | 0.089427917  | 0.391655042  | 0.150902500  | 0.307094788  | 0.366042230  | 0.012226062  | 0.159309826  | 0.208445745  | 0.145722817  | 0.106362761  |
| 148 | PROXIMAL_TUBULE_BICARBONATE_RECLAMATION   | -0.485231537 | -0.277249561 | 0.272582481  | -0.525800820 | -0.267593715 | -0.007680794 | -0.403403465 | -0.140272905 | 0.108072051  | -0.514029959 | -0.401851840 | -0.082420612 | -0.397902245 | -0.375868172 |
| 149 | PURINE_METABOLISM                         | -0.570699454 | -0.667734745 | -0.966886407 | -0.540819798 | -0.757974999 | -0.890090491 | -0.208614338 | -0.808959617 | -0.938462520 | -0.424515573 | -0.388979276 | -0.859996155 | -0.108790239 | -0.633361509 |
| 150 | PYRIMIDINE_METABOLISM                     | -0.205889962 | 0.116709984  | 0.332078548  | -0.281576044 | -0.195147001 | 0.110802456  | 0.330826522  | 0.083584405  | -0.022605887 | 0.008893279  | 0.228779177  | -0.148332835 | 0.131334797  | -0.031768235 |
| 151 | PYRUVATE_METABOLISM                       | -0.389044836 | -0.075128769 | 0.165496871  | -0.459777102 | -0.375088109 | -0.073485314 | 0.185254001  | -0.107237177 | -0.182894187 | -0.170248484 | 0.057969411  | -0.317735784 | -0.052017639 | 0.222149631  |
| 152 | REGULATION_OF_ACTIN_CYTOSKELETON          | 0.653741433  | 0.393554094  | -0.013261359 | 0.706044197  | 0.547608838  | 0.266808334  | 0.242242876  | 0.351482303  | 0.250779719  | 0.535557106  | 0.345720027  | 0.421784422  | 0.422321959  | 0.519068651  |
| 153 | REGULATION_OF_AUTOPHAGY                   | 0.571106478  | 0.404977761  | -0.162799981 | 0.599901023  | 0.336947604  | 0.110113329  | 0.555543123  | 0.251374628  | -0.047807660 | 0.636309303  | 0.548512076  | 0.140503633  | 0.533597294  | 0.485704983  |
| 154 | RENAL_CELL_CARCINOMA                      | 0.634447365  | 0.382211197  | -0.062849946 | 0.684743270  | 0.502297204  | 0.222127232  | 0.287195329  | 0.318776153  | 0.183090035  | 0.546422728  | 0.370386971  | 0.361229028  | 0.431079213  | 0.503634300  |
| 155 | RENIN_ANGIOTENSIN_SYSTEM                  | 0.715469950  | 0.505609377  | 0.018972347  | 0.753743849  | 0.552599823  | 0.302216666  | 0.461965971  | 0.414423804  | 0.209822634  | 0.677429423  | 0.530408536  | 0.391306995  | 0.572953646  | 0.608710300  |
| 156 | RETINOL_METABOLISM                        | 0.485713665  | 0.189731858  | -0.170421654 | 0.549672439  | 0.404575442  | 0.099995956  | 0.027734486  | 0.168996284  | 0.137489859  | 0.333025328  | 0.126972475  | 0.300235942  | 0.295993882  | 0.329357439  |
| 157 | RIBOFLAVIN_METABOLISM                     | -0.303809267 | -0.572384368 | -0.816063446 | -0.234575353 | -0.386406660 | -0.653705105 | -0.471594790 | -0.608355420 | -0.557344180 | -0.382994628 | -0.507462447 | -0.449479409 | -0.502945013 | -0.455914018 |
| 158 | RIBOSOME                                  | 0.355397878  | 0.180040492  | -0.395195410 | 0.389485353  | 0.103200437  | -0.133746684 | 0.424949695  | 0.010616603  | -0.281392835 | 0.445813691  | 0.374475585  | -0.094952468 | 0.334365712  | 0.261835106  |
| 159 | RIG_I_LIKE_RECEPTOR_SIGNALING_PATHWAY     | 0.855697762  | 0.660335608  | 0.270952883  | 0.889142616  | 0.755420835  | 0.533313567  | 0.469605598  | 0.617806130  | 0.470761591  | 0.760577051  | 0.594287003  | 0.629138236  | 0.674689320  | 0.759363142  |
| 160 | RNA_DEGRADATION                           | -0.626542082 | -0.347383852 | -0.123352289 | -0.685390453 | -0.629818410 | -0.361497686 | -0.000634536 | -0.391391633 | -0.445195139 | -0.398415319 | -0.168524235 | -0.574880818 | -0.298614325 | -0.482091296 |
| 161 | RNA_POLYMERASE                            | -0.535254954 | -0.393713308 | 0.187723824  | -0.558329848 | -0.282974582 | -0.074632869 | -0.600419033 | -0.222642624 | 0.106755884  | -0.635428843 | -0.571229849 | -0.078781649 | -0.538271519 | -0.462677905 |
| 162 | SELENOAMINO_ACID_METABOLISM               | 0.148782225  | 0.400866299  | 0.786027632  | 0.086961745  | 0.306349472  | 0.581078112  | 0.206809872  | 0.494739478  | 0.567506453  | 0.159735858  | 0.265522897  | 0.424451659  | 0.286427058  | 0.290414470  |
| 163 | SMALL_CELL_LUNG_CANCER                    | 0.813380037  | 0.705556148  | 0.196513559  | 0.824693752  | 0.614038589  | 0.447068353  | 0.749386875  | 0.575255360  | 0.265316299  | 0.788655528  | 0.433367631  | 0.796320450  | 0.763554410  |              |
| 164 | SNARE_INTERACTIONS_IN_VESICULAR_TRANSPORT | 0.464197877  | 0.215891389  | -0.286909200 | 0.515472097  | 0.284409155  | -0.002383979 | 0.260420483  | 0.112762630  | -0.065686645 | 0.433744165  | 0.287062784  | 0.121264621  | 0.309385999  | 0.332787378  |
| 165 | SPHINGOLIPID_METABOLISM                   | 0.061719099  | -0.243727744 | -0.249982741 | 0.136824077  | 0.155672679  | -0.103681185 | -0.589088080 | -0.133560607 | 0.118514961  | -0.227118598 | -0.453235362 | 0.185871580  | -0.324329656 | -0.10        |

|     | Pathways                                   | cluster | Afatinib     | Erlotinib HCl | Dacomitinib  | Gefitinib    | Lapatinib    | Neratinib    | CO-1686      | Everolimus   | BYL719       | Pilralisib   | XL765        | Pazopanib HCl | Sunitinib Malate |
|-----|--------------------------------------------|---------|--------------|---------------|--------------|--------------|--------------|--------------|--------------|--------------|--------------|--------------|--------------|---------------|------------------|
| 175 | TAURINE_AND_HYPOTAUROINE_METABOLISM        | C1      | -0.492888090 | -0.191378701  | -0.306544331 | 0.201645194  | 0.086259030  | -0.516895755 | -0.617692527 | 0.052881840  | 0.116922259  | -0.111892110 | 0.164569323  | -0.180514197  | -0.479708503     |
| 176 | TERPENOID_BACKBONE_BIOSYNTHESIS            | C3      | -0.053310729 | 0.227911421   | 0.064189495  | 0.589901930  | 0.514100215  | -0.092324439 | -0.260666517 | 0.489574516  | 0.548309909  | 0.343812879  | 0.587014283  | 0.264659162   | -0.073030169     |
| 177 | TGF_BETA_SIGNALING_PATHWAY                 | C3      | 0.118406605  | -0.318149547  | 0.369670083  | -0.594497682 | -0.214394280 | 0.308043828  | 0.559177369  | -0.225158638 | -0.353309189 | -0.164751588 | -0.349695041 | -0.247058651  | -0.046106400     |
| 178 | THYROID_CANCER                             | C3      | 0.271451313  | -0.126524798  | 0.335553672  | -0.473085816 | -0.198010823 | 0.395291879  | 0.595520001  | -0.189133371 | -0.294392312 | -0.076835937 | -0.314235049 | -0.091824824  | 0.170993952      |
| 179 | TIGHT_JUNCTION                             | C2      | 0.598643728  | 0.202154914   | 0.912803388  | 0.046038291  | 0.520868387  | 0.796621244  | 0.933599604  | 0.501723925  | 0.371180989  | 0.507683199  | 0.390072215  | 0.343050969   | 0.343023463      |
| 180 | TOLL LIKE RECEPTOR SIGNALING PATHWAY       | C2      | 0.697988074  | 0.366250859   | 0.590235708  | 0.009557608  | 0.219052605  | 0.753403836  | 0.834837982  | 0.244916847  | 0.164080284  | 0.384115389  | 0.126854191  | 0.398579020   | 0.619114951      |
| 181 | TRYPTOPHAN_METABOLISM                      | C3      | 0.459665463  | 0.017198581   | 0.734000028  | -0.223217546 | 0.228125707  | 0.657837188  | 0.849693704  | 0.215218442  | 0.078888983  | 0.257727596  | 0.087524553  | 0.130633084   | 0.236913667      |
| 182 | TYPE_I_DIABETES_MELLITUS                   | C2      | 0.936816585  | 0.683923341   | 0.877169068  | 0.458664822  | 0.696565950  | 0.985891403  | 0.973295451  | 0.714009383  | 0.644786241  | 0.798181243  | 0.622194860  | 0.757605948   | 0.810361296      |
| 183 | TYPE_II_DIABETES_MELLITUS                  | C1      | -0.757650298 | -0.943940785  | -0.454338728 | -0.997888548 | -0.849166288 | -0.618638200 | -0.364372314 | -0.876373573 | -0.936152803 | -0.898302796 | -0.910889147 | -0.942399756  | -0.801080378     |
| 184 | TYROSINE_METABOLISM                        | C3      | 0.101073627  | -0.288037663  | 0.198588383  | -0.617151256 | -0.353922847 | 0.232469630  | 0.458190568  | -0.349274402 | -0.452801326 | -0.247267919 | -0.468115208 | -0.261409015  | 0.010504010      |
| 185 | UBIQUITIN_MEDIATED_PROTEOLYSIS             | C1      | -0.622787252 | -0.479386882  | -0.195141389 | -0.102102962 | -0.018550500 | -0.533440136 | -0.512741577 | -0.072871629 | -0.065447206 | -0.267124192 | 0.004444040  | -0.417846002  | -0.710987261     |
| 186 | VALINE_LEUCINE_AND_ISOLEUCINE_BIOSYNTHESIS | C2      | 0.666868766  | 0.840926951   | 0.519053538  | 0.976493845  | 0.911218753  | 0.577320607  | 0.346166922  | 0.921337652  | 0.966368433  | 0.891698475  | 0.962356149  | 0.874057091   | 0.653723384      |
| 187 | VALINE_LEUCINE_AND_ISOLEUCINE_DEGRADATION  | C3      | 0.223462383  | 0.618632692   | -0.110680170 | 0.825345848  | 0.471119011  | 0.020158649  | -0.267127649 | 0.493097481  | 0.613409650  | 0.467988482  | 0.596558069  | 0.558468797   | 0.373034459      |
| 188 | VASCULAR_SMOOTH_MUSCLE_CONTRACTION         | C3      | 0.475584713  | 0.061581305   | 0.566410794  | -0.267922746 | 0.063493518  | 0.611661904  | 0.784193333  | 0.070132964  | -0.044119707 | 0.171387648  | -0.060036980 | 0.124932456   | 0.333541551      |
| 189 | VASOPRESSIN_REGULATED_WATER_REABSORPTION   | C3      | -0.120355037 | -0.215654004  | -0.444438443 | -0.534620008 | -0.699399907 | -0.191780151 | -0.106876925 | -0.659150562 | -0.653196766 | -0.497221452 | -0.708774896 | -0.324205816  | 0.030282130      |
| 190 | VEGF_SIGNALING_PATHWAY                     | C2      | 0.740205296  | 0.435507991   | 0.583276016  | 0.077930427  | 0.251927217  | 0.773887855  | 0.830928762  | 0.282277312  | 0.211506337  | 0.428858602  | 0.169441598  | 0.459005526   | 0.679347643      |
| 191 | VIBRIO_CHOLERAЕ_INFECTION                  | C3      | 0.290022009  | 0.262866585   | -0.231883723 | -0.082479853 | -0.331728965 | 0.141937594  | 0.110038523  | -0.271653759 | -0.238406289 | -0.073124131 | -0.315120479 | 0.142853103   | 0.476049057      |
| 192 | VIRAL_MYOCARDITIS                          | C2      | 0.843310513  | 0.522262694   | 0.928625041  | 0.313953086  | 0.655834340  | 0.953421528  | 0.999758430  | 0.659612194  | 0.563069668  | 0.716769551  | 0.555829135  | 0.625587128   | 0.660434060      |
| 193 | WNT_SIGNALING_PATHWAY                      | C3      | 0.391613365  | -0.010723451  | 0.852214745  | -0.093739758 | 0.437435771  | 0.634642187  | 0.812181689  | 0.401892699  | 0.260542749  | 0.361235059  | 0.299139170  | 0.150211168   | 0.100159386      |

| Pathways                                       | Axitinib     | Tivozanib    | Vandetanib   | Regorafenib  | Selumetinib  | Trametinib   | Crizotinib   | Cabozantinib | Foretinib    | Palbociclib HCl | Ribociclib   | Abemaciclib  | Veliparib    | Olaparib     |
|------------------------------------------------|--------------|--------------|--------------|--------------|--------------|--------------|--------------|--------------|--------------|-----------------|--------------|--------------|--------------|--------------|
| 175 TAURINE_AND_HYPOTAURINE_METABOLISM         | -0.488035294 | -0.185434285 | -0.261412832 | -0.430203588 | -0.584038975 | -0.785921200 | -0.276478391 | -0.447669829 | -0.356306778 | -0.505571478    | 0.158643691  | 0.196060349  | -0.225600102 | -0.431171142 |
| 176 TERPENOID_BACKBONE_BIOSYNTHESIS            | -0.046702537 | 0.270743493  | 0.119893947  | -0.084832606 | -0.207947162 | -0.617278197 | 0.124025583  | -0.002580496 | 0.098482463  | -0.098093783    | -0.017697915 | 0.613264305  | 0.229516218  | -0.033058859 |
| 177 TGF_BETA_SIGNALING_PATHWAY                 | 0.143517300  | -0.170542653 | -0.320395790 | -0.187109895 | 0.037988265  | 0.223746548  | 0.273131693  | 0.159900611  | 0.048689204  | -0.009797766    | 0.497334590  | -0.427793757 | -0.003121512 | -0.122022614 |
| 178 THYROID_CANCER                             | 0.283764439  | -0.045362613 | -0.091832761 | 0.069168627  | 0.272124087  | 0.492142441  | 0.262427372  | 0.273950422  | 0.164575162  | 0.204531782     | 0.229572676  | -0.374658996 | 0.072086681  | 0.104002471  |
| 179 TIGHT_JUNCTION                             | 0.636319587  | 0.455294431  | 0.090174606  | 0.090749233  | 0.331106013  | 0.081649208  | 0.861282521  | 0.688621726  | 0.622315350  | 0.373979239     | 0.421571333  | 0.302351333  | 0.639228941  | 0.262964802  |
| 180 TOLL_LIKE_RECEPTOR_SIGNALING_PATHWAY       | 0.702980214  | 0.431118979  | 0.381922723  | 0.500645740  | 0.686430203  | 0.707294060  | 0.567589498  | 0.683891247  | 0.601438237  | 0.646528569     | -0.106761985 | 0.080964214  | 0.501981904  | 0.560049860  |
| 181 TRYPTOPHAN_METABOLISM                      | 0.492209048  | 0.230040210  | -0.046042162 | 0.022083128  | 0.272150699  | 0.210239007  | 0.661745575  | 0.527049602  | 0.434313697  | 0.272544769     | 0.439305167  | 0.000118777  | 0.412366372  | 0.153501185  |
| 182 TYPE_I_DIABETES_MELLITUS                   | 0.948998315  | 0.808271277  | 0.623584994  | 0.634685402  | 0.802366343  | 0.521085281  | 0.890412173  | 0.955993794  | 0.916851125  | 0.829871836     | -0.159596611 | 0.577461214  | 0.877128672  | 0.757655497  |
| 183 TYPE_II_DIABETES_MELLITUS                  | -0.744326188 | -0.914665240 | -0.891870073 | -0.775543831 | -0.713820330 | -0.277542533 | -0.559992238 | -0.734035806 | -0.804512527 | -0.784198206    | 0.634572016  | -0.945118563 | -0.815837455 | -0.825506597 |
| 184 TYROSINE_METABOLISM                        | 0.113239243  | -0.217956980 | -0.241429125 | -0.069856471 | 0.121227932  | 0.413874547  | 0.114058259  | 0.103347437  | -0.008780298 | 0.043605949     | 0.304779644  | -0.526951397 | -0.098745881 | -0.053221058 |
| 185 UBIQUITIN_MEDIATED_PROTEOLYSIS             | -0.599587834 | -0.375095772 | -0.579960618 | -0.732338875 | -0.804034564 | -0.968635193 | -0.215411175 | -0.531750937 | -0.474644687 | -0.724025214    | 0.548752338  | -0.001704469 | -0.323134532 | -0.691552484 |
| 186 VALINE_LEUCINE_AND_ISOLEUCINE_BIOSYNTHESIS | 0.664630008  | 0.872246718  | 0.747370007  | 0.590038040  | 0.539845346  | 0.027100488  | 0.612652290  | 0.679330344  | 0.756694375  | 0.637299474     | -0.432722242 | 0.983673033  | 0.811015055  | 0.673111837  |
| 187 VALINE_LEUCINE_AND_ISOLEUCINE_DEGRADATION  | 0.197541100  | 0.486086164  | 0.609001188  | 0.474915997  | 0.283260122  | -0.004977508 | 0.003466266  | 0.176272355  | 0.283685797  | 0.339751822     | -0.652215884 | 0.669860083  | 0.317070594  | 0.439302252  |
| 188 VASCULAR_SMOOTH_MUSCLE_CONTRACTION         | 0.493467490  | 0.188208533  | 0.058084964  | 0.182152030  | 0.406701170  | 0.480562690  | 0.504705906  | 0.496120873  | 0.395014414  | 0.367690674     | 0.216286230  | -0.128681868 | 0.320640864  | 0.259777042  |
| 189 VASOPRESSIN_REGULATED_WATER_REABSORPTION   | -0.147646666 | -0.388726187 | -0.049536788 | 0.160736508  | 0.173246010  | 0.684922933  | -0.471088079 | -0.223130773 | -0.293413135 | 0.040836945     | -0.272698909 | -0.690956760 | -0.445252803 | 0.027813866  |
| 190 VEGF_SIGNALING_PATHWAY                     | 0.741750045  | 0.482922118  | 0.456248277  | 0.571949924  | 0.744312166  | 0.752962554  | 0.570878417  | 0.717293785  | 0.640960549  | 0.704551092     | -0.187306591 | 0.130269438  | 0.536628725  | 0.625155843  |
| 191 VIBRIO_CHOLERAE_INFECTION                  | 0.253050578  | 0.058424309  | 0.421861441  | 0.602214670  | 0.593802380  | 0.940547470  | -0.208458790 | 0.162773546  | 0.116558697  | 0.480512592     | -0.634688075 | -0.280021871 | -0.051670225 | 0.482868578  |
| 192 VIRAL_MYOCARDITIS                          | 0.866076517  | 0.702746215  | 0.439155697  | 0.446994307  | 0.650826346  | 0.370946318  | 0.916710967  | 0.891188159  | 0.839425479  | 0.685354696     | 0.063336205  | 0.492136823  | 0.820119878  | 0.594580156  |
| 193 WNT_SIGNALING_PATHWAY                      | 0.437716330  | 0.280133780  | -0.144076861 | -0.164394053 | 0.076902456  | -0.168614132 | 0.781404358  | 0.508861959  | 0.444458819  | 0.131429438     | 0.639365416  | 0.202323524  | 0.495250982  | 0.018315801  |

| Pathways                                       | Erismodegib  | Vismodegib   | Temozolomide | Ibrutinib    | RXDX-101     | Ruxolitinib  | Alectinib    | Vemurafenib  | Dabrafenib   | Nilotinib    | Dasatinib    | Bosutinib    | ABT-199      | Dovitinib    |
|------------------------------------------------|--------------|--------------|--------------|--------------|--------------|--------------|--------------|--------------|--------------|--------------|--------------|--------------|--------------|--------------|
| 175 TAURINE_AND_HYPOTAURINE_METABOLISM         | -0.640868358 | -0.362814828 | -0.094014475 | -0.698886565 | -0.619011290 | -0.344674273 | -0.056746439 | -0.387964613 | -0.406339238 | -0.435320284 | -0.211899173 | -0.547085330 | -0.331269357 | -0.496990588 |
| 176 TERPENOID_BACKBONE_BIOSYNTHESIS            | -0.231636431 | 0.089966332  | 0.271859597  | -0.306973175 | -0.241926300 | 0.057790067  | 0.348334956  | 0.040320287  | -0.089575953 | 0.003383949  | 0.230498433  | -0.207600901 | 0.121225276  | -0.058602691 |
| 177 TGF_BETA_SIGNALING_PATHWAY                 | 0.259978032  | -0.010435745 | -0.477483514 | 0.319928109  | 0.091939948  | -0.209031213 | 0.065311182  | -0.104618517 | -0.232818737 | 0.218472964  | 0.070890294  | -0.055269616 | 0.086273441  | 0.113773427  |
| 178 THYROID_CANCER                             | 0.427032329  | 0.133093631  | -0.262405812 | 0.491035356  | 0.320331372  | 0.011538174  | 0.035765674  | 0.091514255  | 0.033086342  | 0.302946341  | 0.109968441  | 0.202491802  | 0.174926635  | 0.270764808  |
| 179 TIGHT_JUNCTION                             | 0.632274056  | 0.540335917  | -0.029732272 | 0.641718040  | 0.378927262  | 0.214887418  | 0.744627073  | 0.363831043  | -0.001195547 | 0.759093621  | 0.719077284  | 0.173672405  | 0.681323501  | 0.588198975  |
| 180 TOLL_LIKE_RECEPTOR_SIGNALING_PATHWAY       | 0.809675707  | 0.588117624  | 0.217599641  | 0.850441012  | 0.724746274  | 0.483173410  | 0.370823859  | 0.559977760  | 0.450306735  | 0.686687226  | 0.503135780  | 0.608388869  | 0.593421242  | 0.698494022  |
| 181 TRYPTOPHAN_METABOLISM                      | 0.549432894  | 0.361370687  | -0.196694977 | 0.584070128  | 0.325897612  | 0.081898308  | 0.488392010  | 0.218322712  | -0.054524856 | 0.592166581  | 0.489170109  | 0.135463533  | 0.482993942  | 0.451809715  |
| 182 TYPE_I_DIABETES_MELLITUS                   | 0.958230758  | 0.891340112  | 0.508348460  | 0.958296849  | 0.830458592  | 0.718696736  | 0.784536222  | 0.813544689  | 0.560338627  | 0.964831944  | 0.879976644  | 0.692821744  | 0.923198130  | 0.933464458  |
| 183 TYPE_II_DIABETES_MELLITUS                  | -0.642357504 | -0.838713353 | -0.935425862 | -0.585148603 | -0.687839490 | -0.872673246 | -0.660577563 | -0.859231531 | -0.751078881 | -0.684893159 | -0.746109513 | -0.702974074 | -0.773271033 | -0.759152773 |
| 184 TYROSINE_METABOLISM                        | 0.265859377  | -0.040557106 | -0.404337244 | 0.335500121  | 0.168947732  | -0.146276275 | -0.111565936 | -0.075271929 | -0.095612638 | 0.135823883  | -0.054830148 | 0.064473394  | 0.003595126  | 0.100644848  |
| 185 UBIQUITIN_MEDIATED_PROTEOLYSIS             | -0.740308310 | -0.522307373 | -0.444870026 | -0.783477054 | -0.818507580 | -0.625585780 | -0.039221301 | -0.619110046 | -0.728157309 | -0.476143948 | -0.255552699 | -0.812201006 | -0.414720909 | -0.631609287 |
| 186 VALINE_LEUCINE_AND_ISOLEUCINE_BIOSYNTHESIS | 0.524206320  | 0.767534553  | 0.811937108  | 0.456567199  | 0.516099695  | 0.731888836  | 0.745751557  | 0.739312763  | 0.554889487  | 0.654208235  | 0.769733746  | 0.506582876  | 0.749168278  | 0.664653548  |
| 187 VALINE_LEUCINE_AND_ISOLEUCINE_DEGRADATION  | 0.080809627  | 0.345229483  | 0.736812150  | 0.016931787  | 0.233132963  | 0.518962199  | 0.188083711  | 0.432633270  | 0.501362850  | 0.109249451  | 0.229847336  | 0.352374199  | 0.239041793  | 0.228229900  |
| 188 VASCULAR_SMOOTH_MUSCLE_CONTRACTION         | 0.602983794  | 0.352730118  | -0.112148690 | 0.653075827  | 0.456356961  | 0.174591279  | 0.294218083  | 0.277416289  | 0.125895223  | 0.531573883  | 0.363327814  | 0.307629533  | 0.413959239  | 0.472697523  |
| 189 VASOPRESSIN_REGULATED_WATER_REABSORPTION   | 0.044928881  | -0.239791653 | -0.154395347 | 0.115832935  | 0.184308318  | -0.043193462 | -0.649645195 | -0.097159841 | 0.206619196  | -0.270525521 | -0.494542637 | 0.246826664  | -0.351376749 | -0.109262684 |
| 190 VEGF_SIGNALING_PATHWAY                     | 0.846243332  | 0.635402846  | 0.296317691  | 0.884070535  | 0.779040000  | 0.551668701  | 0.380887577  | 0.620207498  | 0.524242154  | 0.711618157  | 0.527090245  | 0.673359166  | 0.626092735  | 0.741595265  |
| 191 VIBRIO_CHOLERAE_INFECTION                  | 0.420466148  | 0.193139817  | 0.319217335  | 0.472086849  | 0.594708854  | 0.424161953  | -0.365508130 | 0.361045541  | 0.638205108  | 0.084925475  | -0.142277166 | 0.666225611  | 0.035589428  | 0.303167563  |
| 192 VIRAL_MYOCARDITIS                          | 0.870838424  | 0.790520958  | 0.316831280  | 0.874770248  | 0.687988421  | 0.550163136  | 0.801582686  | 0.670485079  | 0.362522626  | 0.924753961  | 0.853523718  | 0.517668196  | 0.866812242  | 0.837022508  |
| 193 WNT_SIGNALING_PATHWAY                      | 0.413540163  | 0.344166535  | -0.243335871 | 0.420327941  | 0.126488992  | -0.022318535 | 0.688128346  | 0.135862259  | -0.256289454 | 0.600753565  | 0.602078616  | -0.087622800 | 0.523271331  | 0.378547744  |
