# Supplementary material for: Patient-Derived Tumor Organoids for Guidance of Personalized Drug Therapies in Recurrent Glioblastoma
Source: MDPI journal article supplement (doi:10.3390/ijms23126572), 2022-06-12
Supplement: s1 [file s1]

Table S1. Mean area-under-the-curve values for all tested drugs in the individual patients MA01-MA04 and their corresponding mean z-score. The color-coding of the drugs is analogous to the colors used to group drugs in Figure 4. Abbreviation: SD, standard deviation

|                    | MA01     |        |         |            | MA02     |        |         |            | MA03     |        |         |            | MA04     |        |         |            |
|--------------------|----------|--------|---------|------------|----------|--------|---------|------------|----------|--------|---------|------------|----------|--------|---------|------------|
|                    | mean AUC | SD AUC | z-score | SD z-score | mean AUC | SD AUC | z-score | SD z-score | mean AUC | SD AUC | z-score | SD z-score | mean AUC | SD AUC | z-score | SD z-score |
| Afatinib           | 236.50   | 8.75   | -0.94   | 0.21       | 251.34   | 11.55  | -0.90   | 0.22       | 269.39   | 0.00   | -1.52   | 0.00       | 247.87   | 10.61  | -0.72   | 0.20       |
| Erlotinib HCl      | 317.44   | 19.03  | 1.03    | 0.46       | 340.57   | 18.43  | 0.83    | 0.36       | 402.13   | 0.00   | 0.40    | 0.00       | 313.45   | 5.19   | 0.53    | 0.10       |
| Dacomitinib        | 266.66   | 10.57  | -0.20   | 0.26       | 295.59   | 25.40  | -0.04   | 0.49       | 363.81   | 0.00   | -0.16   | 0.00       | 326.53   | 3.70   | 0.77    | 0.07       |
| Gefitinib          | 298.58   | 11.91  | 0.57    | 0.29       | 329.50   | 20.42  | 0.62    | 0.40       | 377.46   | 0.00   | 0.04    | 0.00       | 300.50   | 6.74   | 0.28    | 0.13       |
| Lapatinib          | 297.68   | 23.25  | 0.55    | 0.57       | 341.94   | 20.23  | 0.86    | 0.39       | 403.91   | 0.00   | 0.42    | 0.00       | 328.40   | 9.29   | 0.81    | 0.18       |
| Neratinib          | 246.04   | 29.20  | -0.71   | 0.71       | 264.88   | 11.62  | -0.63   | 0.23       | 358.82   | 0.00   | -0.23   | 0.00       | 281.11   | 4.56   | -0.09   | 0.09       |
| CO-1686            | 259.14   | 20.76  | -0.39   | 0.50       | 265.69   | 13.86  | -0.62   | 0.27       | 404.44   | 0.00   | 0.43    | 0.00       | 309.10   | 8.54   | 0.44    | 0.16       |
| Everolimus         | 198.39   | 29.86  | -1.86   | 0.73       | 306.76   | 26.45  | 0.18    | 0.51       | 392.42   | 0.00   | 0.26    | 0.00       | 262.85   | 9.62   | -0.44   | 0.18       |
| BYL719             | 242.87   | 28.11  | -0.78   | 0.68       | 319.46   | 28.02  | 0.42    | 0.54       | 396.18   | 0.00   | 0.31    | 0.00       | 277.00   | 8.61   | -0.17   | 0.16       |
| Pilralisib         | 266.05   | 30.62  | -0.22   | 0.74       | 333.54   | 22.54  | 0.70    | 0.44       | 444.82   | 0.00   | 1.01    | 0.00       | 303.60   | 9.59   | 0.34    | 0.18       |
| XL765              | 239.24   | 32.01  | -0.87   | 0.78       | 316.76   | 17.44  | 0.37    | 0.34       | 366.60   | 0.00   | -0.12   | 0.00       | 278.20   | 9.80   | -0.14   | 0.19       |
| Pazopanib HCl      | 323.66   | 15.43  | 1.18    | 0.37       | 344.22   | 19.80  | 0.90    | 0.38       | 422.07   | 0.00   | 0.68    | 0.00       | 327.75   | 11.57  | 0.80    | 0.22       |
| Sunitinib Malate   | 271.55   | 22.58  | -0.09   | 0.55       | 283.14   | 18.90  | -0.28   | 0.37       | 299.68   | 0.00   | -1.08   | 0.00       | 263.00   | 9.48   | -0.43   | 0.18       |
| Axitinib           | 281.06   | 19.45  | 0.15    | 0.47       | 302.67   | 20.37  | 0.10    | 0.39       | 405.54   | 0.00   | 0.45    | 0.00       | 301.07   | 7.19   | 0.29    | 0.14       |
| Tivozanib          | 300.44   | 33.49  | 0.62    | 0.81       | 336.15   | 14.43  | 0.75    | 0.28       | 411.60   | 0.00   | 0.53    | 0.00       | 315.78   | 11.12  | 0.57    | 0.21       |
| Vandetanib         | 265.97   | 18.43  | -0.22   | 0.45       | 286.17   | 20.70  | -0.22   | 0.40       | 293.45   | 0.00   | -1.17   | 0.00       | 248.72   | 11.95  | -0.70   | 0.23       |
| Regorafenib        | 286.45   | 30.31  | 0.28    | 0.74       | 293.00   | 16.50  | -0.09   | 0.32       | 351.20   | 0.00   | -0.34   | 0.00       | 251.58   | 9.28   | -0.65   | 0.18       |
| Selumetinib        | 312.24   | 16.07  | 0.90    | 0.39       | 312.73   | 14.12  | 0.29    | 0.27       | 368.50   | 0.00   | -0.09   | 0.00       | 299.57   | 5.73   | 0.26    | 0.11       |
| Trametinib         | 315.14   | 36.23  | 0.97    | 0.88       | 263.47   | 10.45  | -0.66   | 0.20       | 348.18   | 0.00   | -0.38   | 0.00       | 257.30   | 10.74  | -0.54   | 0.20       |
| Crizotinib         | 144.80   | 15.57  | -3.17   | 0.38       | 210.33   | 8.54   | -1.69   | 0.17       | 357.23   | 0.00   | -0.25   | 0.00       | 266.48   | 10.46  | -0.37   | 0.20       |
| Cabozantinib       | 289.08   | 31.68  | 0.34    | 0.77       | 314.97   | 19.27  | 0.34    | 0.37       | 445.26   | 0.00   | 1.02    | 0.00       | 317.09   | 12.44  | 0.59    | 0.24       |
| Foretinib          | 221.30   | 28.18  | -1.31   | 0.68       | 254.15   | 21.66  | -0.84   | 0.42       | 359.50   | 0.00   | -0.22   | 0.00       | 246.98   | 14.55  | -0.74   | 0.28       |
| Palbociclib HCl    | 308.28   | 20.56  | 0.81    | 0.50       | 321.24   | 16.25  | 0.46    | 0.31       | 384.65   | 0.00   | 0.14    | 0.00       | 299.20   | 10.58  | 0.25    | 0.20       |
| Ribociclib         | 354.52   | 8.40   | 1.93    | 0.20       | 354.80   | 15.12  | 1.11    | 0.29       | 366.04   | 0.00   | -0.12   | 0.00       | 376.47   | 8.42   | 1.72    | 0.16       |
| Abermaciclib       | 258.22   | 35.16  | -0.41   | 0.85       | 318.66   | 13.25  | 0.41    | 0.26       | 304.97   | 0.00   | -1.01   | 0.00       | 282.83   | 12.50  | -0.06   | 0.24       |
| Veliparib          | 269.58   | 46.00  | -0.13   | 1.12       | 322.62   | 13.67  | 0.48    | 0.26       | 430.52   | 0.00   | 0.81    | 0.00       | 313.02   | 6.51   | 0.52    | 0.12       |
| Olaparib           | 325.23   | 14.37  | 1.22    | 0.35       | 338.64   | 12.04  | 0.79    | 0.23       | 420.74   | 0.00   | 0.67    | 0.00       | 311.94   | 8.17   | 0.50    | 0.16       |
| Erismodegib        | 279.50   | 27.41  | 0.11    | 0.67       | 286.43   | 19.77  | -0.22   | 0.38       | 437.26   | 0.00   | 0.90    | 0.00       | 293.60   | 15.05  | 0.15    | 0.29       |
| Vismodegib         | 297.19   | 31.69  | 0.54    | 0.77       | 328.28   | 12.73  | 0.59    | 0.25       | 438.32   | 0.00   | 0.92    | 0.00       | 314.07   | 15.54  | 0.54    | 0.30       |
| Temsirolimus       | 286.89   | 15.67  | 0.29    | 0.38       | 308.91   | 10.83  | 0.22    | 0.21       | 286.38   | 0.00   | -1.28   | 0.00       | 272.75   | 10.04  | -0.25   | 0.19       |
| Ibrutinib          | 273.96   | 27.27  | -0.03   | 0.66       | 272.14   | 13.01  | -0.49   | 0.25       | 476.38   | 0.00   | 1.47    | 0.00       | 286.06   | 14.59  | 0.01    | 0.28       |
| RXDX-101           | 250.38   | 6.64   | -0.60   | 0.16       | 249.40   | 12.65  | -0.93   | 0.24       | 255.76   | 0.00   | -1.72   | 0.00       | 239.35   | 5.77   | -0.88   | 0.11       |
| Ruxolitinib        | 316.13   | 20.99  | 1.00    | 0.51       | 340.12   | 17.25  | 0.82    | 0.33       | 371.40   | 0.00   | -0.05   | 0.00       | 300.77   | 7.48   | 0.28    | 0.14       |
| Certinib/Alectinib | 255.53   | 12.91  | -0.47   | 0.31       | 341.00   | 21.89  | 0.84    | 0.42       | 448.39   | 0.00   | 1.06    | 0.00       | 354.84   | 10.87  | 1.31    | 0.21       |
| Vemurafenib        | 292.84   | 32.79  | 0.43    | 0.80       | 310.96   | 25.14  | 0.26    | 0.49       | 436.02   | 0.00   | 0.89    | 0.00       | 291.05   | 11.35  | 0.10    | 0.22       |
| Dabrafenib         | 333.66   | 37.46  | 1.42    | 0.91       | 336.52   | 14.35  | 0.75    | 0.28       | 441.21   | 0.00   | 0.96    | 0.00       | 291.72   | 6.21   | 0.11    | 0.12       |
| Nilotinib          | 329.77   | 7.59   | 1.33    | 0.18       | 350.83   | 12.96  | 1.03    | 0.25       | 444.30   | 0.00   | 1.01    | 0.00       | 358.15   | 16.55  | 1.37    | 0.31       |
| Dasatinib          | 198.55   | 40.45  | -1.86   | 0.98       | 267.25   | 10.37  | -0.59   | 0.20       | 374.29   | 0.00   | -0.01   | 0.00       | 270.17   | 6.24   | -0.30   | 0.12       |
| Bosutinib          | 269.74   | 24.13  | -0.13   | 0.59       | 266.60   | 12.51  | -0.60   | 0.24       | 292.55   | 0.00   | -1.19   | 0.00       | 243.01   | 5.86   | -0.81   | 0.11       |
| ABT-199            | 245.37   | 46.77  | -0.72   | 1.14       | 295.34   | 18.54  | -0.04   | 0.36       | 429.02   | 0.00   | 0.78    | 0.00       | 292.99   | 7.52   | 0.14    | 0.14       |
| Dovitinib          | 252.19   | 22.11  | -0.56   | 0.54       | 273.20   | 17.85  | -0.47   | 0.35       | 353.35   | 0.00   | -0.31   | 0.00       | 267.30   | 7.73   | -0.35   | 0.15       |
| Bortezomib         | 52.62    | 6.32   | -5.41   | 0.15       | 49.74    | 2.71   | -4.80   | 0.05       | 102.53   | 0.00   | -3.93   | 0.00       | 20.09    | 1.17   | -5.05   | 0.02       |
