# Supplementary material for: Patient-Derived Tumor Organoids for Guidance of Personalized Drug Therapies in Recurrent Glioblastoma
Source: MDPI journal article supplement (doi:10.3390/ijms23126572), 2022-06-12
Supplement: s1 [file s1]

Table S3. Pearson correlation coefficients of PD-GBO drug response score and specific inter-individual KEGG pathway enrichment levels from RNA-seq of glioblastoma tumor tissue.

|                                                          | Patient ID   |              |              |              |
|----------------------------------------------------------|--------------|--------------|--------------|--------------|
|                                                          | MA01         | MA02         | MA03         | MA04         |
| N_GLYCAN_BIOSYNTHESIS                                    | -0.575057848 | 1.439325655  | -0.097342393 | -0.766925414 |
| OTHER_GLYCAN_DEGRADATION                                 | 0.108933002  | -0.261672798 | 1.282188339  | -1.129448543 |
| O_GLYCAN_BIOSYNTHESIS                                    | -0.6064274   | -0.506166616 | 1.493609241  | -0.381015225 |
| GLYCOSAMINOGLYCAN_DEGRADATION                            | -0.28818805  | -0.126198375 | 1.39360873   | -0.979222306 |
| GLYCOSAMINOGLYCAN_BIOSYNTHESIS_KERATAN_SULFATE           | 0.163788922  | -0.032738805 | 1.151749416  | -1.282799533 |
| GLYCEROLIPID_METABOLISM                                  | 0.484891581  | 0.318766881  | 0.67991343   | -1.483571892 |
| GLYCOSYLPHOSPHATIDYLINOSITOL_GPI_ANCHOR_BIOSYNTHESIS     | -0.807092358 | -0.904789107 | 1.035787229  | 0.676094235  |
| GLYCEROPHOSPHOLIPID_METABOLISM                           | 0.458856872  | 0.846101862  | 0.12921858   | -1.434177314 |
| ETHER_LIPID_METABOLISM                                   | -0.694294278 | -0.148602199 | 1.456009886  | -0.613113409 |
| ARACHIDONIC_ACID_METABOLISM                              | -0.550610942 | 0.058327646  | 1.380217054  | -0.887933758 |
| LINOLEIC_ACID_METABOLISM                                 | 1.29336618   | -0.517374964 | 0.227815194  | -1.00380641  |
| ALPHA_LINOLENIC_ACID_METABOLISM                          | -0.331681031 | 1.487682653  | -0.643644329 | -0.512357293 |
| SPHINGOLIPID_METABOLISM                                  | 0.161265938  | -1.193721475 | 1.228983028  | -0.196527491 |
| GLYCOSPHINGOLIPID_BIOSYNTHESIS_LACTO_AND_NEOLACTO_SERIES | -0.245763043 | -1.292928521 | 0.564223256  | 0.974468308  |
| GLYCOSPHINGOLIPID_BIOSYNTHESIS_GLOBO_SERIES              | -0.979853933 | 0.639918677  | 1.056706701  | -0.716771446 |
| GLYCOSPHINGOLIPID_BIOSYNTHESIS_GANGLIO_SERIES            | -0.046390879 | -0.224392121 | 1.341798219  | -1.07101522  |
| RIBOFLAVIN_METABOLISM                                    | -0.866089182 | -0.787779502 | 1.188633232  | 0.465235452  |
| NICOTINATE_AND_NICOTINAMIDE_METABOLISM                   | -0.453035563 | 1.148670766  | 0.43747218   | -1.133107383 |
| PANTOTHENATE_AND_COA_BIOSYNTHESIS                        | -0.592613981 | 0.684824599  | 0.996864619  | -1.089075236 |
| AMINOACYL_TRNA_BIOSYNTHESIS                              | 0.934070134  | 0.510744386  | -1.363854319 | -0.080960201 |
| BASAL_TRANSCRIPTION_FACTORS                              | -0.006598709 | 1.000850067  | -1.364301474 | 0.370050116  |
| NON_HOMOLOGOUS_END_JOINING                               | 0.120717757  | 0.735760943  | -1.447382416 | 0.590903716  |
| SNARE_INTERACTIONS_IN_VESICULAR_TRANSPORT                | -0.832386664 | 0.085379249  | 1.378698412  | -0.631690996 |
| LYSOSOME                                                 | -0.006928037 | -0.003313716 | 1.229843003  | -1.21960125  |
| CARDIAC_MUSCLE_CONTRACTION                               | 0.630025264  | 0.021489719  | -1.419002769 | 0.767487786  |
| RENIN_ANGIOTENSIN_SYSTEM                                 | -0.555677024 | 0.321968448  | 1.248280272  | -1.014571696 |
| CIRCADIAN_RHYTHM_MAMMAL                                  | 0.057360381  | 0.476155473  | 0.879467655  | -1.412983509 |
| TASTE_TRANSDUCTION                                       | -0.615506676 | 1.098039899  | -1.047194883 | 0.56466166   |
| PROXIMAL_TUBULE_BICARBONATE_RECLAMATION                  | 0.956767941  | -0.339838488 | -1.25154583  | 0.634616376  |
| PATHOGENIC_ESCHERICHIA_COLI_INFECTION                    | 0.134886696  | 0.701596219  | 0.616098064  | -1.452580979 |
| SYSTEMIC_LUPUS_ERYTHEMATOSUS                             | 0.376308432  | 0.886586153  | -1.429853702 | 0.166959118  |
| PRIMARY_IMMUNODEFICIENCY                                 | -0.841748028 | 0.314989765  | 1.276666991  | -0.749908728 |
| HYPERTROPHIC_CARDIOMYOPATHY_HCM                          | -0.242761243 | 0.362857251  | 1.123630598  | -1.243726607 |
| ARRHYTHMOGENIC_RIGHT_VENTRICULAR_CARDIOMYOPATHY_ARVC     | 0.053451961  | 0.109793727  | 1.13734468   | -1.300590368 |

|                                                        |              |              |              |              |
|--------------------------------------------------------|--------------|--------------|--------------|--------------|
| DILATED_CARDIOMYOPATHY                                 | -0.433575213 | 0.325484343  | 1.215990068  | -1.107899198 |
| GLYCOLYSIS_GLUONEOGENESIS                              | 0.966052474  | -0.194436708 | 0.544579546  | -1.316195313 |
| CITRATE_CYCLE_TCA_CYCLE                                | 0.477538893  | 1.128870435  | -1.125177243 | -0.481232084 |
| PENTOSE_PHOSPHATE_PATHWAY                              | 0.583826661  | 0.995383912  | -0.330582258 | -1.248628315 |
| PENTOSE_AND_GLUCURONATE_INTER<br>CONVERSIONS           | -0.571307765 | 0.070152349  | 1.378209676  | -0.87705426  |
| FRUCTOSE_AND_MANNOSE_METABOL<br>ISM                    | 1.370911296  | -0.933916783 | 0.05801636   | -0.495010873 |
| GALACTOSE_METABOLISM                                   | 0.717505951  | 0.576955891  | 0.163475986  | -1.457937828 |
| ASCORBATE_AND_ALDARATE_METAB<br>OLISM                  | -0.667337578 | 0.174344137  | 1.342567752  | -0.849574311 |
| FATTY_ACID_METABOLISM                                  | 0.441271629  | -0.938665897 | 1.197508273  | -0.700114005 |
| STEROID_BIOSYNTHESIS                                   | -0.131556609 | 1.441068575  | -0.498865915 | -0.810646051 |
| PRIMARY_BILE_ACID_BIOSYNTHESIS                         | -0.633997106 | -0.225526325 | 1.473264299  | -0.613740868 |
| STEROID_HORMONE_BIOSYNTHESIS                           | -0.624347641 | -0.187600721 | 1.465541527  | -0.653593165 |
| OXIDATIVE_PHOSPHORYLATION                              | 0.636781135  | 0.862204997  | -0.146321193 | -1.352664939 |
| PURINE_METABOLISM                                      | -1.347387155 | -0.115357586 | 0.506173134  | 0.956571607  |
| PYRIMIDINE_METABOLISM                                  | 0.266200994  | 0.832335118  | -1.452862126 | 0.354326015  |
| ALANINE_ASPARTATE_AND_GLUTAM<br>ATE_METABOLISM         | -0.205619403 | 1.047658133  | -1.28866517  | 0.44662644   |
| GLYCINE_SERINE_AND_THREONINE_<br>METABOLISM            | 0.483176388  | -0.223863684 | 1.028532771  | -1.287845475 |
| CYSTEINE_AND_METHIONINE_METAB<br>OLISM                 | 0.741076605  | 0.483461064  | -1.468809731 | 0.244272062  |
| VALINE_LEUCINE_AND_ISOLEUCINE_<br>DEGRADATION          | 1.05572676   | 0.413534682  | -1.298131157 | -0.171130286 |
| VALINE_LEUCINE_AND_ISOLEUCINE_<br>BIOSYNTHESIS         | 0.543772034  | 1.132595587  | -0.928834267 | -0.747533354 |
| LYSINE_DEGRADATION                                     | 0.210351392  | 0.740966147  | -1.464147245 | 0.512829705  |
| ARGININE_AND_PROLINE_METABOLIS<br>M                    | -0.199938433 | 0.633549915  | 0.893291027  | -1.326902509 |
| HISTIDINE_METABOLISM                                   | -1.127104345 | -0.079973861 | 1.308777034  | -0.101698829 |
| TYROSINE_METABOLISM                                    | -0.622154593 | -0.480037101 | 1.493187875  | -0.390996181 |
| PHENYLALANINE_METABOLISM                               | -0.842616366 | 1.214288529  | 0.425077549  | -0.796749713 |
| TRYPTOPHAN_METABOLISM                                  | -0.924005774 | 0.462728739  | 1.186072239  | -0.724795204 |
| BETA_ALANINE_METABOLISM                                | -0.49448818  | -0.583550782 | -0.418546685 | 1.496585647  |
| TAURINE_AND_HYPOTAURINE_META<br>BOLISM                 | 0.002878292  | 0.36845834   | -1.367887568 | 0.996550936  |
| SELENOAMINO_ACID_METABOLISM                            | 1.109627873  | 0.404819687  | -1.235800471 | -0.27864709  |
| GLUTATHIONE_METABOLISM                                 | -0.528627157 | 1.273720984  | 0.268001984  | -1.01309581  |
| STARCH_AND_SUCROSE_METABOLIS<br>M                      | -0.489426631 | 0.046229936  | 1.37487904   | -0.931682345 |
| AMINO_SUGAR_AND_NUCLEOTIDE_SU<br>GAR_METABOLISM        | 0.619786023  | -0.122246606 | 0.864142758  | -1.361682175 |
| GLYCOSAMINOGLYCAN_BIOSYNTHES<br>IS_CHONDROITIN_SULFATE | 0.313262933  | 0.620719043  | 0.552914164  | -1.48689614  |
| GLYCOSAMINOGLYCAN_BIOSYNTHES<br>IS_HEPARAN_SULFATE     | 1.008447893  | -1.161324892 | 0.634413255  | -0.481536255 |
| INOSITOL_PHOSPHATE_METABOLISM                          | 0.654871142  | -1.489399355 | 0.369229328  | 0.465298884  |
| PYRUVATE_METABOLISM                                    | 0.159035873  | 0.672784369  | -1.45900799  | 0.627187748  |
| GLYOXYLATE_AND_DICARBOXYLATE<br>_METABOLISM            | 1.4114758    | -0.532858741 | -0.850291291 | -0.028325768 |

|                                                  |              |              |              |              |
|--------------------------------------------------|--------------|--------------|--------------|--------------|
| PROPANOATE_METABOLISM                            | 1.390872252  | -0.520387983 | -0.891202273 | 0.020718004  |
| BUTANOATE_METABOLISM                             | 0.86467464   | -0.335944815 | -1.264290218 | 0.735560394  |
| ONE_CARBON_POOL_BY_FOLATE                        | 0.075565674  | 1.1145528    | -1.317510237 | 0.127391763  |
| FOLATE_BIOSYNTHESIS                              | 0.659596739  | -1.450043457 | 0.668996173  | 0.121450545  |
| RETINOL_METABOLISM                               | -0.40005026  | -0.348121883 | 1.478370946  | -0.730198802 |
| PORPHYRIN_AND_CHLOROPHYLL_ME<br>TABOLISM         | -0.555946963 | 0.11622094   | 1.355806712  | -0.916080688 |
| TERPENOID_BACKBONE_BIOSYNTHES<br>IS              | 0.149095649  | 0.875871251  | -1.430454437 | 0.405487537  |
| LIMONENE_AND_PINENE_DEGRADATI<br>ON              | -1.34378239  | 0.96074394   | -0.123012762 | 0.506051212  |
| NITROGEN_METABOLISM                              | 1.115410275  | -0.91094323  | -0.774966368 | 0.570499323  |
| SULFUR_METABOLISM                                | -0.356473229 | 0.558994659  | 1.025669705  | -1.228191135 |
| METABOLISM_OF_XENOBIOTICS_BY_<br>CYTOCHROME_P450 | -0.551637168 | -0.080324149 | 1.431677058  | -0.799715741 |
| DRUG_METABOLISM_CYTOCHROME_P<br>450              | -0.401264737 | -0.101007491 | 1.413600178  | -0.91132795  |
| DRUG_METABOLISM_OTHER_ENZYME<br>S                | -0.418610854 | -0.149598056 | 1.433224704  | -0.865015793 |
| BIOSYNTHESIS_OF_UNSATURATED_FA<br>TTY_ACIDS      | 0.886755378  | 0.577019145  | -1.368045999 | -0.095728523 |
| ABC_TRANSPORTERS                                 | 1.418526216  | -0.930258063 | -0.204131473 | -0.28413668  |
| RIBOSOME                                         | -1.166945585 | 0.45922198   | 1.120972233  | -0.413248627 |
| RNA_DEGRADATION                                  | -0.106739471 | 0.4578519    | -1.341175868 | 0.990063439  |
| RNA_POLYMERASE                                   | 1.020243495  | -0.685188447 | -1.014135184 | 0.679080136  |
| DNA_REPLICATION                                  | -0.10409618  | 0.786681442  | -1.375056379 | 0.692471117  |
| SPLICEOSOME                                      | -0.303043324 | 0.761218626  | -1.283542165 | 0.825366863  |
| PROTEASOME                                       | 0.119592033  | 1.364622169  | -0.637087618 | -0.847126583 |
| PROTEIN_EXPORT                                   | 0.932846871  | 0.425987883  | -1.395348622 | 0.036513868  |
| PPAR_SIGNALING_PATHWAY                           | -0.312585618 | -0.117864093 | 1.397543512  | -0.967093801 |
| BASE_EXCISION_REPAIR                             | -0.038516298 | 0.937460876  | -1.375656105 | 0.476711527  |
| NUCLEOTIDE_EXCISION_REPAIR                       | -0.112498953 | 0.942653075  | -1.351605553 | 0.521451431  |
| MISMATCH_REPAIR                                  | 0.123222837  | 0.607722776  | -1.449065999 | 0.718120386  |
| HOMOLOGOUS_RECOMBINATION                         | 0.203186025  | 0.640092258  | -1.468882716 | 0.625604433  |
| MAPK_SIGNALING_PATHWAY                           | -0.481881891 | 0.164777578  | 1.318371241  | -1.001266929 |
| ERBB_SIGNALING_PATHWAY                           | 0.280191199  | -1.478079771 | 0.697190323  | 0.500698248  |
| CALCIUM_SIGNALING_PATHWAY                        | 0.371691361  | -1.35779269  | 1.008825144  | -0.022723815 |
| CYTOKINE_CYTOKINE_RECEPTOR_INT<br>ERACTION       | -0.566683501 | 0.180792644  | 1.326904853  | -0.941013996 |
| CHEMOKINE_SIGNALING_PATHWAY                      | -0.615449076 | 0.035672004  | 1.397110108  | -0.817333035 |
| PHOSPHATIDYLINOSITOL_SIGNALING<br>_SYSTEM        | 1.14338741   | -1.184383654 | 0.400669297  | -0.359673053 |
| NEUROACTIVE_LIGAND_RECEPTOR_I<br>NTERACTION      | -0.110064399 | -1.360840688 | 0.570805098  | 0.900099989  |
| CELL_CYCLE                                       | -0.171595535 | 0.596380118  | -1.335927951 | 0.911143368  |
| OOCYTE_MEIOSIS                                   | -0.253106099 | 0.790570795  | -1.309525548 | 0.772060852  |
| P53_SIGNALING_PATHWAY                            | -1.011252676 | 0.62599804   | -0.676649368 | 1.061904004  |
| UBIQUITIN_MEDIATED_PROTEOLYSIS                   | -0.598660893 | 0.419050534  | -1.016963054 | 1.196573413  |
| REGULATION_OF_AUTOPHAGY                          | -0.937901217 | 0.577726841  | 1.107909966  | -0.74773559  |
| ENDOCYTOSIS                                      | -0.001527888 | -0.813599092 | 1.409021973  | -0.593894993 |
| PEROXISOME                                       | 0.687315796  | 0.709987612  | 0.024980171  | -1.422283579 |
| MTOR_SIGNALING_PATHWAY                           | -1.064694913 | 0.508149747  | 1.130721208  | -0.574176042 |

|                                              |              |              |              |              |
|----------------------------------------------|--------------|--------------|--------------|--------------|
| APOPTOSIS                                    | -0.403177734 | 0.045145891  | 1.35615571   | -0.998123867 |
| VASCULAR_SMOOTH_MUSCLE_CONTRACTION           | -0.59077067  | 0.071623384  | 1.380087622  | -0.860940336 |
| WNT_SIGNALING_PATHWAY                        | -1.18444026  | 0.933601696  | 0.714498713  | -0.463660148 |
| DORSO_VENTRAL_AXIS_FORMATION                 | 0.083889114  | -1.113215538 | 1.296953868  | -0.267627444 |
| NOTCH_SIGNALING_PATHWAY                      | 0.518047112  | -1.306122224 | -0.203934323 | 0.992009435  |
| HEDGEHOG_SIGNALING_PATHWAY                   | -0.030239825 | 0.218088318  | -1.30509713  | 1.117248638  |
| TGF_BETA_SIGNALING_PATHWAY                   | -0.926182445 | -0.155963339 | 1.41638477   | -0.334238986 |
| AXON_GUIDANCE                                | 0.221411079  | -0.98895265  | 1.29984659   | -0.532305019 |
| VEGF_SIGNALING_PATHWAY                       | -0.020432105 | 0.11596032   | 1.173213557  | -1.268741772 |
| FOCAL_ADHESION                               | -0.230878637 | 0.304160673  | 1.157405927  | -1.230687963 |
| ECM_RECEPTOR_INTERACTION                     | -0.276988094 | 0.648421501  | 0.917425573  | -1.28885898  |
| CELL_ADHESION_MOLECULES_CAMS                 | -0.144801638 | -0.425297397 | 1.433014708  | -0.862915672 |
| ADHERENS_JUNCTION                            | -0.071077522 | -0.356142002 | 1.391924788  | -0.964705264 |
| TIGHT_JUNCTION                               | -0.912688742 | 0.907693682  | 0.821972656  | -0.816977596 |
| GAP_JUNCTION                                 | -0.418608482 | -0.91499536  | 1.407848757  | -0.074244914 |
| COMPLEMENT_AND_COAGULATION_CASCADES          | -0.2062586   | -0.219217053 | 1.39993758   | -0.974461927 |
| ANTIGEN_PROCESSING_AND_PRESENTATION          | -0.124325456 | 0.018893954  | 1.273090345  | -1.167658843 |
| TOLL_LIKE_RECEPTOR_SIGNALING_PATHWAY         | -0.138802556 | 0.111974206  | 1.231575853  | -1.204747503 |
| NOD_LIKE_RECEPTOR_SIGNALING_PATHWAY          | -0.207314427 | -0.078621504 | 1.349193423  | -1.063257492 |
| RIG_I_LIKE_RECEPTOR_SIGNALING_PATHWAY        | -0.155607542 | 0.27089918   | 1.145631756  | -1.260923394 |
| CYTOSOLIC_DNA_SENSING_PATHWAY                | 0.135327037  | -0.354264834 | 1.29947229   | -1.080534493 |
| JAK_STAT_SIGNALING_PATHWAY                   | -0.507669086 | 0.070238079  | 1.367990442  | -0.930559435 |
| HEMATOPOIETIC_CELL_LINEAGE                   | -0.550919364 | 0.168600777  | 1.330233014  | -0.947914427 |
| NATURAL_KILLER_CELL_MEDIATED_CYTOTOXICITY    | -0.382662515 | -0.063914609 | 1.3958432    | -0.949266076 |
| T_CELL_RECEPTOR_SIGNALING_PATHWAY            | -0.789051319 | 0.321198883  | 1.27430748   | -0.806455045 |
| B_CELL_RECEPTOR_SIGNALING_PATHWAY            | -0.027948041 | -0.217312022 | 1.33133143   | -1.086071368 |
| FC_EPSILON_RI_SIGNALING_PATHWAY              | -0.337091564 | 0.416558718  | 1.124244644  | -1.203711798 |
| FC_GAMMA_R_MEDIATED_PHAGOCYTOSIS             | 0.00998236   | -0.426193775 | 1.376789422  | -0.960578006 |
| LEUKOCYTE_TRANSENDOTHELIAL_MIGRATION         | -0.030077588 | -0.171183278 | 1.315031243  | -1.113770377 |
| INTESTINAL_IMMUNE_NETWORK_FOR_IGA_PRODUCTION | -0.104291667 | 0.163321679  | 1.18718278   | -1.246212792 |
| LONG_TERM_POTENTIATION                       | 0.283858874  | -1.365159092 | 0.055284415  | 1.026015803  |
| NEUROTROPHIN_SIGNALING_PATHWAY               | -0.402266619 | -0.28228617  | 1.465706371  | -0.781153583 |
| LONG_TERM_DEPRESSION                         | 0.318687133  | -1.461812893 | 0.338997484  | 0.804128276  |
| OLFACTORY_TRANSDUCTION                       | 0.374687179  | -1.356476584 | 1.009366291  | -0.027576885 |
| REGULATION_OF_ACTIN_CYTOSKELETON             | -0.377154266 | -0.048253566 | 1.388488833  | -0.963081001 |
| INSULIN_SIGNALING_PATHWAY                    | 0.413649766  | 0.690848383  | 0.380934805  | -1.485432953 |
| GNRH_SIGNALING_PATHWAY                       | -0.710893743 | 0.942019053  | 0.773403243  | -1.004528553 |

|                                                            |              |              |              |              |
|------------------------------------------------------------|--------------|--------------|--------------|--------------|
| PROGESTERONE_MEDIATED_OOCYTE_MATURATION                    | -0.709300295 | 0.561265811  | -0.967836077 | 1.115870561  |
| MELANOGENESIS                                              | -1.125098755 | 0.50227884   | 1.11388003   | -0.491060115 |
| ADIPOCYTOKINE_SIGNALING_PATHWAY                            | 0.341531899  | -0.027676686 | 1.033311323  | -1.347166535 |
| TYPE_II_DIABETES_MELLITUS                                  | -0.822087475 | -0.902961584 | 0.760212674  | 0.964836386  |
| TYPE_I_DIABETES_MELLITUS                                   | -0.086758667 | 0.822600952  | 0.643283256  | -1.379125542 |
| MATURITY_ONSET_DIABETES_OF_THE_YOUNG                       | 0.078252968  | -1.415026623 | 0.446921001  | 0.889852655  |
| ALDOSTERONE_REGULATED_SODIUM_REABSORPTION                  | -0.88372673  | 0.055966879  | 1.381687135  | -0.553927284 |
| VASOPRESSIN_REGULATED_WATER_REABSORPTION                   | 0.38913634   | -1.278540063 | 1.084384878  | -0.194981155 |
| ALZHEIMERS_DISEASE                                         | 0.508268966  | 0.255362945  | 0.710174333  | -1.473806243 |
| PARKINSONS_DISEASE                                         | 0.502165132  | 1.055090295  | -0.319230053 | -1.238025373 |
| AMYOTROPHIC_LATERAL_SCLEROSIS_ALS                          | 0.066802896  | -0.916373991 | 1.372126711  | -0.522555616 |
| HUNTINGTONS_DISEASE                                        | 0.114075855  | 1.371458131  | -0.779398144 | -0.706135842 |
| PRION_DISEASES                                             | -0.360804174 | -0.655154819 | 1.488924493  | -0.4729655   |
| VIBRIO_CHOLERAЕ_INFECTION                                  | 0.848217136  | -0.954245546 | 0.878944624  | -0.772916214 |
| EPITHELIAL_CELL_SIGNALING_IN_HELICOBACTER_PYLORI_INFECTION | 0.058441482  | -0.209150639 | 1.288096096  | -1.137386939 |
| LEISHMANIA_INFECTION                                       | 0.031522268  | 0.073832804  | 1.169616458  | -1.274971531 |
| PATHWAYS_IN_CANCER                                         | -0.593591357 | 0.230546303  | 1.305932783  | -0.942887729 |
| COLORECTAL_CANCER                                          | -1.138469405 | 1.291433438  | 0.033944638  | -0.186908671 |
| RENAL_CELL_CARCINOMA                                       | -0.504503364 | 0.042573274  | 1.379218973  | -0.917288884 |
| PANCREATIC_CANCER                                          | -1.215686328 | 1.067832717  | 0.504571494  | -0.356717883 |
| ENDOMETRIAL_CANCER                                         | 0.693594217  | -1.480940996 | 0.482508495  | 0.304838284  |
| GLIOMA                                                     | 0.805274854  | -1.411082445 | 0.005517411  | 0.600290181  |
| PROSTATE_CANCER                                            | -0.199160612 | -0.150954151 | 1.374277487  | -1.024162724 |
| THYROID_CANCER                                             | -0.555858107 | -0.303451163 | 1.48552701   | -0.626217741 |
| BASAL_CELL_CARCINOMA                                       | 0.367190297  | 1.055651598  | -1.319093335 | -0.10374856  |
| MELANOMA                                                   | -0.835450188 | -0.464973779 | 1.437698847  | -0.137274879 |
| BLADDER_CANCER                                             | -1.074286915 | 0.497647618  | 1.134486899  | -0.557847602 |
| CHRONIC_MYELOID_LEUKEMIA                                   | -0.983945564 | 0.331955072  | 1.250416999  | -0.598426507 |
| ACUTE_MYELOID_LEUKEMIA                                     | -0.353578166 | -0.24189878  | 1.446470614  | -0.850993668 |
| SMALL_CELL_LUNG_CANCER                                     | -0.560471941 | 0.815651021  | 0.869412575  | -1.124591654 |
| NON_SMALL_CELL_LUNG_CANCER                                 | -0.913781211 | 0.118441274  | -0.560112042 | 1.355451978  |
| ASTHMA                                                     | 0.103681206  | 0.388841627  | 0.919234835  | -1.411757668 |
| AUTOIMMUNE_THYROID_DISEASE                                 | -0.138450103 | 0.054663904  | 1.261387536  | -1.177601337 |
| ALLOGRAFT_REJECTION                                        | -0.027729161 | 0.681467694  | 0.750429634  | -1.404168167 |
| GRAFT_VERSUS_HOST_DISEASE                                  | -0.144256999 | 0.384136965  | 1.063879579  | -1.303759545 |
| VIRAL_MYOCARDITIS                                          | -0.417244488 | 0.889591754  | 0.744381715  | -1.21672898  |
| MAPK_SIGNALING_PATHWAY                                     | -0.24587582  | -0.122486808 | 1.379316568  | -1.01095394  |
| ERBB_SIGNALING_PATHWAY                                     | 0.037444441  | -1.379668605 | 0.982824771  | 0.359399393  |
| PI3KAKT_SIGNALING_PATHWAY                                  | -0.257816757 | -0.158080147 | 1.395815462  | -0.979918559 |
| HERPES_SIMPLEX_VIRUS_1_INFECTION                           | -0.202612444 | 0.601807728  | 0.922252886  | -1.321448171 |
| PROTEIN_DIGESTION_AND_ABSORPTION                           | -0.827646482 | 0.059224558  | 1.388267142  | -0.619845218 |
| STAPHYLOCOCCUS_AUREUS_INFECTION                            | -0.355348728 | 0.144314438  | 1.295187874  | -1.084153584 |

HUMAN\_PAPILLOMAVIRUS\_INFECTION

-0.064583518 0.479861077 0.949801196 -1.365078754
