# Supplementary material for: Patient-Derived Tumor Organoids for Guidance of Personalized Drug Therapies in Recurrent Glioblastoma
Source: MDPI journal article supplement (doi:10.3390/ijms23126572), 2022-06-12
Supplement: s1 [file s1]

**Table S4. AUCs from a comparative response analysis of calcein-AM- and ATP-based measurements.**

|               | Calcein AM | ATP-based measurement |
|---------------|------------|-----------------------|
| MK2206        | 986,6      | 835,5                 |
| Enzalutamide  | 1063       | 1071                  |
| Flutamide     | 1095       | 1034                  |
| KU-55933      | 1134       | 1067                  |
| KU-60019      | 1095       | 978,8                 |
| AZ32          | 1135       | 1108                  |
| Berzosertib   | 941,8      | 762,2                 |
| AZD6738       | 1014       | 834                   |
| Alisertib     | 1030       | 820,3                 |
| ENMD-2076     | 1020       | 820,3                 |
| Navitoclax    | 892,3      | 702,8                 |
| AZD5153       | 955,2      | 733,3                 |
| I-BET-762     | 1009       | 930,6                 |
| Acalabrutinib | 1001       | 950,9                 |
| Tasisulam     | 963,5      | 871,1                 |
| Alvocidib     | 789,2      | 566,8                 |
| Palbociclib   | 906        | 720,5                 |
| Ribociclib    | 948,9      | 806,6                 |
| Abemaciclib   | 873        | 743,9                 |
| THZ1          | 756,4      | 495,6                 |
| Prexasertib   | 921,7      | 532,2                 |
| Rabusertib    | 971,4      | 670,4                 |
| MK-8776       | 1038       | 776                   |
| PF-477736     | 966        | 714                   |
| Selinexor     | 891,9      | 497,6                 |
| Carboplatin   | 1152       | 1024                  |
| Oxaliplatin   | 1111       | 1058                  |
| NU7441        | 1254       | 1142                  |
| Thalidomide   | 1157       | 1078                  |
| Gefitinib     | 1108       | 1017                  |
| Lapatinib     | 1125       | 969,4                 |
| Afatinib      | 943        | 661,1                 |
| Zibotentan    | 1100       | 915,9                 |
| Tazemetostat  | 1108       | 921,1                 |
| LNT1          | 1047       | 866,1                 |
| AZD4547       | 968,1      | 702,2                 |
| RRx-001       | 929,8      | 732,4                 |
| RO4929097     | 1055       | 799,6                 |
| Belinostat    | 986,1      | 699,7                 |
| Entinostat    | 986,5      | 642,9                 |
| Romidepsin    | 611,8      | 49,29                 |
| Tasquinimod   | 1097       | 1023                  |

|              |       |       |
|--------------|-------|-------|
| Itraconazole | 1120  | 1020  |
| Lonafarnib   | 1018  | 832,1 |
| Ispinesib    | 862,8 | 543,1 |
| Imatinib     | 1093  | 919,1 |
| Masitinib    | 987,4 | 824,9 |
| Nutlin-3     | 1046  | 854,7 |
| Binimetinib  | 931,7 | 758,5 |
| Pimasertib   | 908,1 | 679,6 |
| SU11274      | 1139  | 986,1 |
| Crizotinib   | 940,2 | 659,1 |
| Patupilone   | 868,8 | 475,1 |
| Vinorelbine  | 800,8 | 352,9 |
| Paclitaxel   | 906   | 542   |
| Mirin        | 1077  | 897,9 |
| Everolimus   | 908,3 | 568,8 |
| Temsirolimus | 916,7 | 584,9 |
| Regorafenib  | 1063  | 893,8 |
| APR-246      | 999,4 | 913,1 |
| ICG-001      | 1186  | 925,8 |
| PHA-665752   | 1133  | 817,3 |
| Tivantinib   | 1153  | 874,6 |
| Decitabine   | 1210  | 1033  |
| Doxorubicin  | 1045  | 543,7 |
| BLU-9931     | 1108  | 820,6 |
| Resminostat  | 1184  | 1008  |
| Tanespimycin | 943,7 | 341,2 |
| Alvespimycin | 898,7 | 176,7 |
| Linsitinib   | 1202  | 1065  |
| Selumetinib  | 1249  | 880,7 |
| Refametinib  | 1149  | 751,3 |
| Trametinib   | 1119  | 629,3 |
| Vinblastine  | 1024  | 411,1 |
| Paclitaxel   | 1128  | 602,8 |
| Rapamycin    | 1099  | 669,8 |
| PF-04691502  | 1071  | 601,4 |
| Dasatinib    | 1231  | 1028  |
| Brivanib     | 1312  | 1149  |
| Lenvatinib   | 1317  | 1121  |

---
