# Supplementary material for: Patient-Derived Tumor Organoids for Guidance of Personalized Drug Therapies in Recurrent Glioblastoma
Source: Int J Mol Sci. 2022 Jun 12;23(12):6572. doi: 10.3390/ijms23126572 (PMC9223608; doi:10.3390/ijms23126572)
Supplement: Supplementary file 1 [file ijms-23-06572-s001.zip]

Archive with 6 entries (6 files):
- IJMS_Movie S1.mp4
- Supplementary materials.pdf
- Table S2.pdf
- TableS1.pdf
- TableS3.pdf
- TableS4.pdf
